# Supplementary material for: Total synthesis and biological evaluation of simplified aplyronine analogues as synthetically tractable anticancer agents
Source: Royal Society of Chemistry journal article supplement (doi:10.1039/c9cc09050a), 2020-01-01

# Total synthesis and biological evaluation of simplified aplyronine analogues as synthetically tractable anticancer agents

Talia R. Pettigrew<sup>†</sup>, Rachel J. Porter<sup>†</sup>, Stephen J. Walsh, Michael P. Housden, Nelson Y. S. Lam, Jason S. Carroll, Jeremy S. Parker, David R. Spring and Ian Paterson\*

## Table of Contents

|                                                                                                                  |           |
|------------------------------------------------------------------------------------------------------------------|-----------|
| <b>Detailed rationale for the simplification of the aplyronines.....</b>                                         | <b>2</b>  |
| 1.1. Summary of SAR studies conducted to date.....                                                               | 2         |
| 1.2. Analysis of the bound Aplyronine A-actin crystal structure .....                                            | 2         |
| <b>Experimental .....</b>                                                                                        | <b>4</b>  |
| 2. General comments .....                                                                                        | 4         |
| 2.1. General experimental procedures .....                                                                       | 4         |
| 2.2. General analytical procedures.....                                                                          | 5         |
| 2.3. Compound numbering nomenclature.....                                                                        | 6         |
| 3. Experimental Procedures for the Synthesis of Aplyrologues <b>7</b> , <i>R/S</i> - <b>8</b> and <b>9</b> ..... | 7         |
| 3.1. Synthesis of the C15-C27 aldehyde <b>12</b> .....                                                           | 7         |
| 3.2. Synthesis of the C28-C34 side chain <i>E</i> - <b>11</b> .....                                              | 14        |
| 3.3. Fragment assembly and synthesis of the macrocycle <b>25</b> .....                                           | 19        |
| 3.4. Completion of synthesis of the aplyrologues .....                                                           | 26        |
| 4. Experimental Procedures for Cell Viability Studies.....                                                       | 39        |
| 4.1. Cell viability studies .....                                                                                | 39        |
| 4.2. Cytotoxicity graphs.....                                                                                    | 40        |
| <b>References.....</b>                                                                                           | <b>41</b> |
| <b>NMR Spectra for All New Compounds .....</b>                                                                   | <b>41</b> |

# Detailed rationale for the simplification of the aplyronines

## 1.1. Summary of SAR studies conducted to date

A summary of structural features important for the bioactivity of the aplyronines is given below.<sup>1-5</sup>

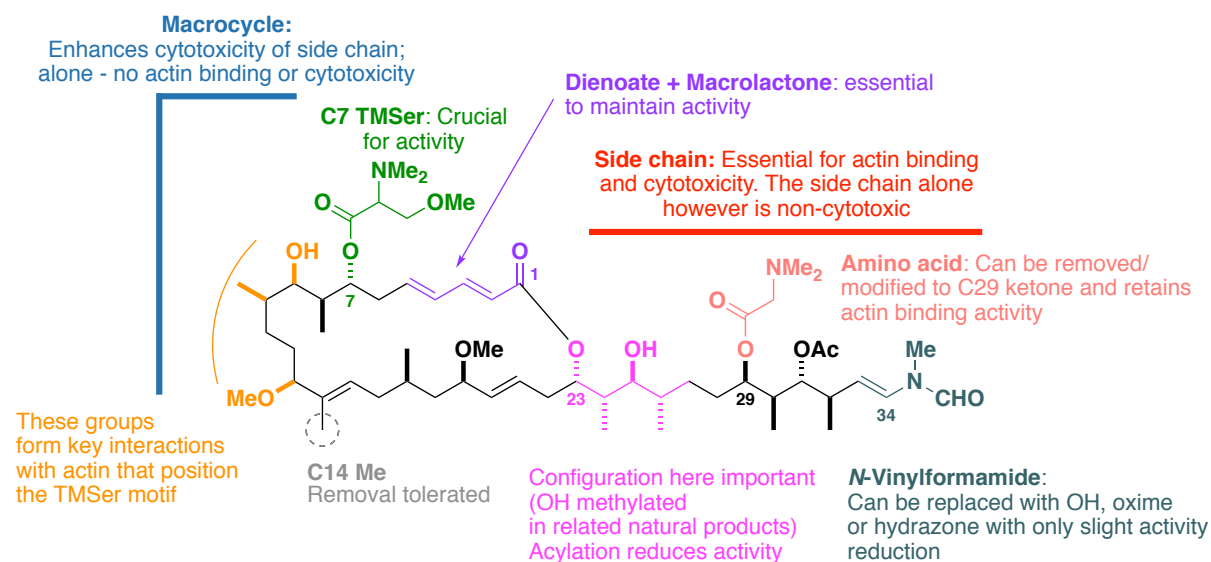

Figure 1. Summary of SAR studies conducted for the aplyronines as overlaid onto aplyronine D

## 1.2. Analysis of the bound Aplyronine A-actin crystal structure

The bound structure of aplyronine A in actin was visualised using Pymol using the Protein Databank (PDB) code: 1WUA.<sup>3</sup> The ATP binding site of actin is identified with the ATP ligand in **red**. Aplyronine A is denoted in **green**.

The aplyronine A bound crystal structure of actin verifies the importance of side chain in binding to a key binding pocket in actin. The C7 TMSer vital for the activity of aplyronines A/D points directly out into bulk solvent, presumably as a binding site to recruit tubulin. It is clear that the macrocycle is required to confer overall geometric control, with the northern hemisphere appearing to contribute to key contacts with actin. The southern hemisphere however did not appear to form relevant contacts as it projects *away* from both actin and where tubulin binds (TMSer) into bulk solvent. Alongside with the SAR study presented above, this observation forms the major rationale for our function-oriented simplification of the aplyronines (see below for annotated diagram).

**Crystal structure of actin with alyronine A bound**

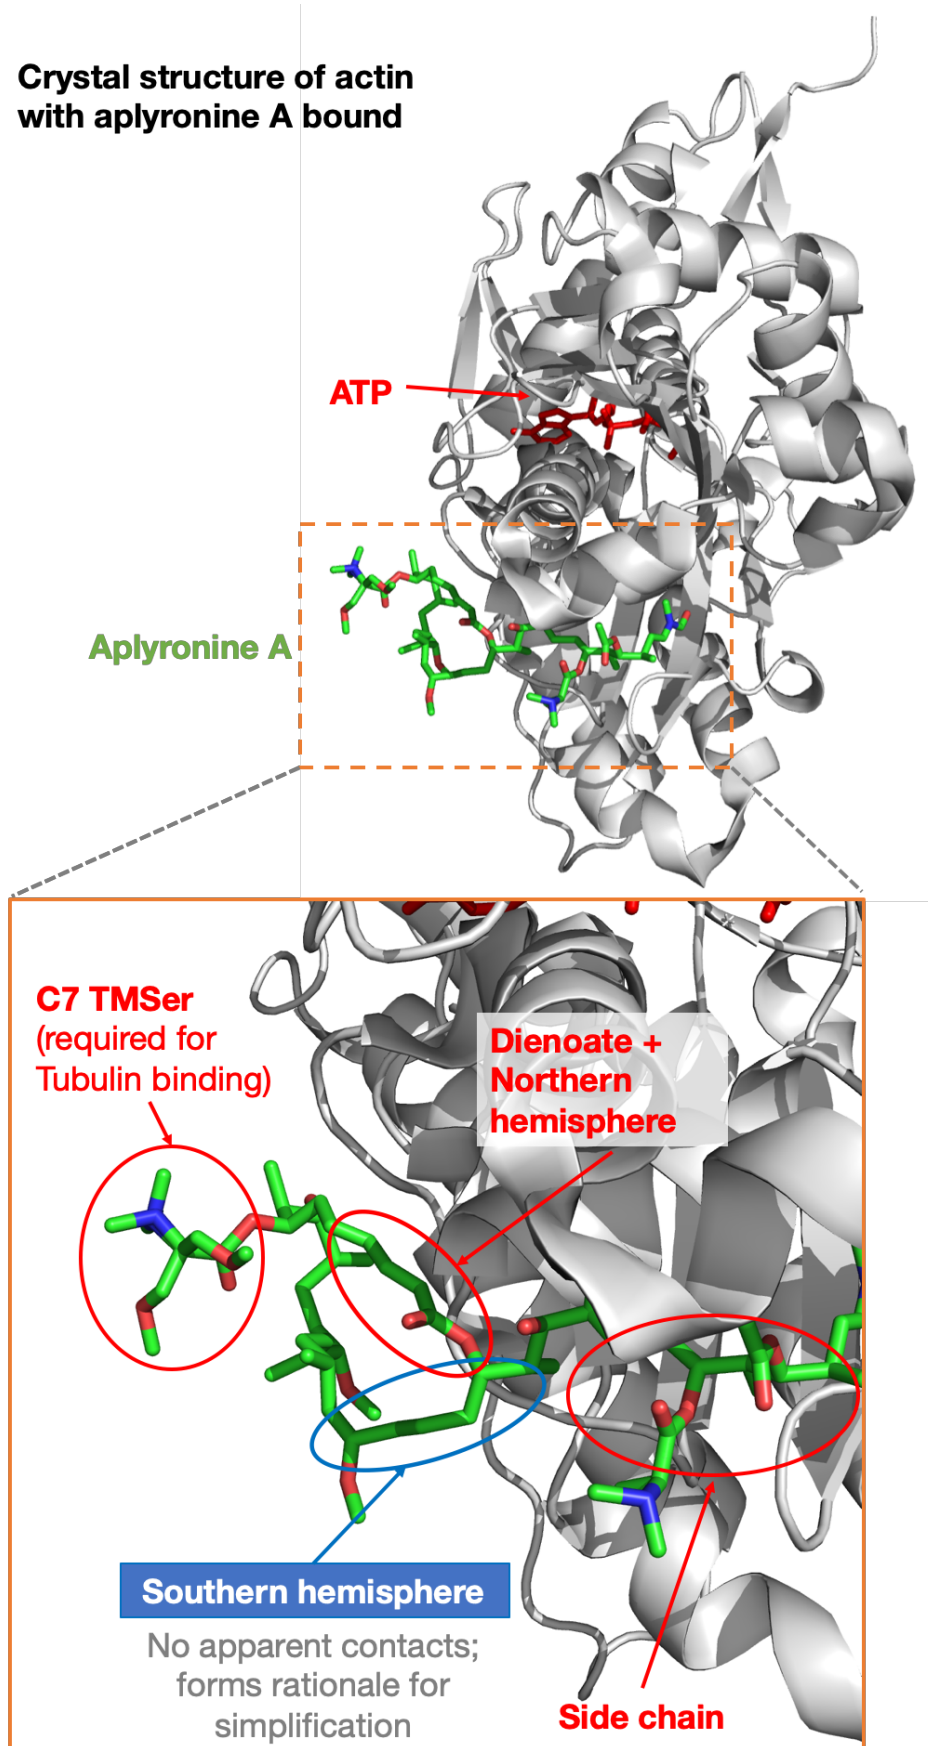

*Figure 2. Annotated figure of the alyronine-bound actin crystal structure, highlighting the key binding areas of alyronine to the relevant biomolecules, as well as the lack of apparent biological contacts of the southern hemisphere*

# Experimental

## 2. General comments

### 2.1. General experimental procedures

All experiments were performed under anhydrous conditions and under an inert atmosphere of argon, except where stated or when water or aqueous solutions were used, using oven-dried apparatus and employing standard techniques for handling air-sensitive materials.

Purification of reagents and solvents was carried out according to standard procedures. Acetonitrile (MeCN), benzene, dichloromethane (CH<sub>2</sub>Cl<sub>2</sub>), and dimethyl sulfoxide (DMSO) were distilled from calcium hydride (CaH<sub>2</sub>) and stored under an argon atmosphere. Tetrahydrofuran (THF) and diethyl ether (Et<sub>2</sub>O) were distilled from benzophenone ketyl radical and sodium or potassium wire, respectively, under an argon atmosphere. Solvents used in workup, extraction, recrystallisation and column chromatography were distilled prior to use.

Triethylamine (Et<sub>3</sub>N), pyridine (py), diethyl ethylphosphonate and hexamethyldisilazane (HMDS) were distilled from and stored over CaH<sub>2</sub>. 2,6-lutidine was distilled from CaH<sub>2</sub> and stored neat under argon. Diisopropylethylamine (*i*Pr<sub>2</sub>NEt) was first distilled from ninhydrin, then distilled from and stored over CaH<sub>2</sub>. Titanium tetrachloride (TiCl<sub>4</sub>), titanium tetraisopropoxide (Ti(O*i*Pr)<sub>4</sub>) and oxalyl chloride ((COCl)<sub>2</sub>) were distilled and stored at -20 °C under an argon atmosphere. Acetaldehyde and propionaldehyde were distilled from calcium chloride (CaCl<sub>2</sub>) immediately prior to use. Proton Sponge was recrystallised from methanol. DDQ was recrystallised from chloroform. Barium hydroxide (Ba(OH)<sub>2</sub>) was dried under high vacuum at 130 °C and stored under argon. All other chemicals were used as received, except where noted otherwise.

Sodium bicarbonate (NaHCO<sub>3</sub>), ammonium chloride (NH<sub>4</sub>Cl), sodium/potassium (Na<sup>+</sup>/K<sup>+</sup>) tartrate, brine (NaCl) and sodium thiosulfate (Na<sub>2</sub>S<sub>2</sub>O<sub>3</sub>) were used as saturated aqueous solutions, unless otherwise stated in the text. Buffer solutions were prepared as directed from stock tablets with deionised water.

Flash column chromatography was carried out on Merck Kieselgel 60 (230–400 mesh) silica gel under a positive pressure of regulated compressed air. Merck Kieselgel F254 plates were used for preparative thin layer chromatography. All solvent mixtures are reported as volume ratios. Solvents were subsequently evaporated *in vacuo*.

## 2.2. General analytical procedures

Analytical thin layer chromatography (TLC) was carried out using Merck Kieselgel 60 F<sub>254</sub> plates which were visualised using UV light (254 nm) and stained with potassium permanganate, vanillin, anisaldehyde or phosphomolybdic acid / cerium (III) sulfate Ce<sub>2</sub>(SO<sub>4</sub>)<sub>3</sub> dips.

Proton nuclear magnetic resonance (NMR) spectra were recorded using an internal deuterium lock at ambient probe temperature (298 K) on the following instruments: Bruker Avance BB, or Bruker Avance TCI (500 MHz and Bruker DPX400 (400 MHz). An internal reference of  $\delta_H = 7.26$  ppm was used for residual solvent protons in CDCl<sub>3</sub> and  $\delta_H = 7.26$  2.50 ppm for DMSO. All <sup>1</sup>H NMR data are represented as: chemical shift (in ppm on the  $\delta$  scale relative to  $\delta_{TMS} = 0$  ppm), integration, multiplicity (s = singlet, d = doublet, t = triplet, q = quartet, m = multiplet, br = broad, obs = obscured, app = apparent), coupling constant ( $J$  in Hz), and assignment. Assignments were determined on the basis of unambiguous chemical shift or coupling pattern, <sup>1</sup>H-<sup>1</sup>H COSY, HSQC and HMBC experiments, or by analogy to fully interpreted data for related compounds.

Proton-decoupled <sup>13</sup>C NMR spectra were recorded using an internal deuterium lock at ambient probe temperature (298K) on the following instruments: Bruker Avance BB and Bruker Avance TCI (125 MHz). An internal reference of  $\delta_C = 77.0$  ppm was used for carbons in CDCl<sub>3</sub> and  $\delta_C = 79.5$  ppm for DMSO. All chemical shift values are reported in ppm on the  $\delta$  scale relative to  $\delta_{TMS} = 0$  ppm.

Infrared spectra were recorded on a Perkin-Elmer Spectrum One FT-IR spectrometer. Absorbance frequencies ( $\nu_{max}$ ) are reported in cm<sup>-1</sup>.

Optical rotations were measured on an Anton Parr MCP100 polarimeter at 589 nm and are reported as follows:  $[\alpha]_D^{20}$  at 20 °C (unless otherwise noted), concentration ( $c$  in g dL<sup>-1</sup>) and solvent.

High resolution mass spectra (HRMS) were recorded at the EPSRC Mass Spectrometry Service (Swansea, UK) or at the departmental mass spectrometry service (University Chemical Laboratories, Cambridge) using electron impact (EI) and electrospray ionization (ESI) techniques. The parent ion is quoted with the indicated cation: [M+H]<sup>+</sup>, [M+Na]<sup>+</sup> or [M+NH<sub>4</sub>]<sup>+</sup>

### 2.3. Compound numbering nomenclature

The numbering system used for aplyronine intermediates and analogues follows that proposed by Yamada and co-workers in their original publication covering the isolation and characterisation of the aplyronines as shown below:

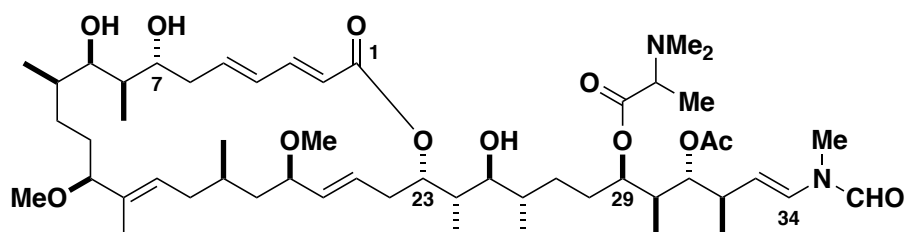

*Figure 3. Structure of aplyronine C, highlighting the compound numbering as proposed by Yamada et al.*

### 3. Experimental Procedures for the Synthesis of Aplyrologues 7, *R/S*-8 and 9

#### 3.1. Synthesis of the C15-C27 aldehyde 12

##### TBS ether 14a

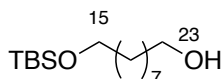

To a solution of 1,9-nonanediol (12.0 g, 74.9 mmol) and imidazole (2.04 g, 68.1 mmol) in THF (80 mL) at 0 °C was added a solution of TBSCl (3.77 g, 25.0 mmol) in THF (70 mL) dropwise over 40 min. The mixture was slowly warmed to rt and allowed to stir for 65 h, then quenched by addition of H<sub>2</sub>O. The phases were separated and the aqueous layer extracted with EtOAc (3 × 100 mL). The combined organics were washed with H<sub>2</sub>O (50 mL), dried over Na<sub>2</sub>SO<sub>4</sub> and concentrated *in vacuo*. Purification by flash chromatography (1:3 → 1:2 EtOAc/PE) gave alcohol **14a** as a colourless oil (5.69 g, 83%).

**R<sub>f</sub>** 0.27 (1:6 EtOAc/PE); **<sup>1</sup>H NMR** (400 MHz, CDCl<sub>3</sub>) δ<sub>H</sub> 3.64 (2H, t, *J* = 6.6 Hz, H<sub>23</sub>), 3.59 (2H, t, *J* = 6.6 Hz, H<sub>15</sub>), 1.61–1.45 (4H, m, H<sub>16</sub>,H<sub>22</sub>), 1.39–1.24 (10H, m, H<sub>17–21</sub>), 0.89 (9H, s, SiC(CH<sub>3</sub>)<sub>3</sub>), 0.04 (6H, s, Si(CH<sub>3</sub>)<sub>2</sub>); **<sup>13</sup>C NMR** (125 MHz, CDCl<sub>3</sub>) δ<sub>C</sub> 63.3, 63.0, 32.8, 32.8, 29.6, 29.3, 29.3, 26.0, 25.8, 25.7, 18.4, –5.3; **HRMS** calc. for C<sub>15</sub>H<sub>35</sub>O<sub>2</sub>Si [M+H]<sup>+</sup> 275.2401, found 275.2402.

These data are in agreement with those reported by Diab *et al.*<sup>6</sup>

##### Aldehyde 14

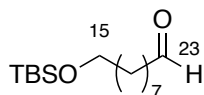

To a solution of oxalyl chloride (2.39 mL, 28.2 mmol) in CH<sub>2</sub>Cl<sub>2</sub> (50 mL) at –78 °C was added DMSO (2.67 mL, 37.6 mmol). The mixture was stirred for 30 min, then a solution of alcohol **14a** (5.16 g, 18.8 mmol) in CH<sub>2</sub>Cl<sub>2</sub> (25 mL) was added *via* cannula and stirred for a further 1 h. Addition of Et<sub>3</sub>N (7.86 mL, 56.4 mmol) dropwise at –78 °C caused the reaction mixture to seize. After warming to rt with stirring and addition of CH<sub>2</sub>Cl<sub>2</sub> (20 mL), the resulting yellow solution was allowed to stir for 16 h. The reaction was quenched carefully with NH<sub>4</sub>Cl (40 mL). The phases were separated and the aqueous layer extracted with CH<sub>2</sub>Cl<sub>2</sub> (2 × 80 mL).

The combined organics were washed with NaHCO<sub>3</sub> (50 mL), dried over MgSO<sub>4</sub> and concentrated *in vacuo*. The crude product was purified by flash chromatography (1:15 EtOAc/PE) to give aldehyde **14** as a colourless oil (4.68 g, 91%).

**R<sub>f</sub>** 0.50 (1:8 EtOAc/PE); **<sup>1</sup>H NMR** (400 MHz, CDCl<sub>3</sub>) δ<sub>H</sub> 9.76 (1H, t, *J* = 1.9 Hz, H<sub>23</sub>), 3.59 (2H, t, *J* = 6.6 Hz, H<sub>15</sub>), 2.41 (2H, td, *J* = 7.4, 1.9 Hz, H<sub>22</sub>), 1.68–1.57 (2H, m, H<sub>16</sub>), 1.55–1.43 (2H, m, H<sub>21</sub>), 1.37–1.24 (8H, m, H<sub>17–20</sub>), 0.89 (9H, s, SiC(CH<sub>3</sub>)<sub>3</sub>), 0.04 (6H, s, Si(CH<sub>3</sub>)<sub>2</sub>); **HRMS** calc. for C<sub>15</sub>H<sub>33</sub>O<sub>2</sub>Si [M+H]<sup>+</sup> 273.2244, found 273.2248.

These data are in agreement with those reported by Cryle *et al.*<sup>7</sup>

### Aldol adduct **15**

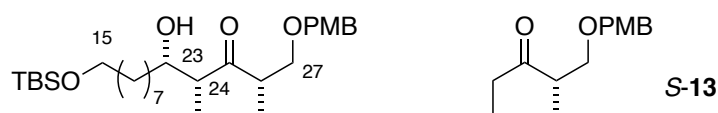

To a solution of TiCl<sub>4</sub> (1.37 mL, 12.5 mmol) in CH<sub>2</sub>Cl<sub>2</sub> (50 mL) at 0 °C was added Ti(O*i*-Pr)<sub>4</sub> (1.23 mL, 4.17 mmol). The mixture was stirred at 0 °C for 10 min, then at rt for 30 min. The resulting colourless solution was added dropwise to a solution of ketone **S-13** (3.52 g, 14.9 mmol, stirred over CaH<sub>2</sub> immediately before use) in CH<sub>2</sub>Cl<sub>2</sub> (150 mL) at –78 °C, during which the solution gradually turned through yellow to light orange. Dropwise addition of *i*-Pr<sub>2</sub>NEt (2.85 mL, 16.4 mmol) caused a further colour change to dark red. The reaction mixture was stirred at –78 °C for 30 min to allow full enolisation. Aldehyde **14** (4.46 g, 16.4 mmol, stirred over CaH<sub>2</sub> immediately before use) in CH<sub>2</sub>Cl<sub>2</sub> (100 mL) was then added *via* cannula down the side of the reaction flask over 10 min. Shortly thereafter the solution was observed to return to a light orange colour. The mixture was stirred at –78 °C for a further 40 min. Upon completion the reaction was quenched with NaHCO<sub>3</sub>/Na<sup>+</sup>/K<sup>+</sup> tartrate (1:1, 90 mL) and warmed to rt. The biphasic mixture was stirred vigorously for 2 h and then left to stand overnight. The layers were separated and the organic phase washed with brine (100 mL). The combined aqueous fractions were then extracted with EtOAc (2 × 100 mL). The organics were dried over Na<sub>2</sub>SO<sub>4</sub> and concentrated *in vacuo*. Purification by flash chromatography (1:10 → 1:5 EtOAc/PE) afforded aldol adduct **15** as a colourless oil (6.42 g, 85%, 18:1 *dr*).

**R<sub>f</sub>** 0.26 (1:5 EtOAc/PE); **<sup>1</sup>H NMR** (500 MHz, CDCl<sub>3</sub>) δ<sub>H</sub> 7.18 (2H, d, *J* = 8.7 Hz, ArH), 6.85 (2H, d, *J* = 8.7 Hz, ArH), 4.39 (1H, d, *J* = 11.4 Hz, ArCH<sub>a</sub>H<sub>b</sub>O), 4.36 (1H, d, *J* = 11.5 Hz, ArCH<sub>a</sub>H<sub>b</sub>O), 4.00–3.95 (1H, m, H<sub>23</sub>), 3.79 (3H, s, ArOMe), 3.61 (1H, app t, *J* = 8.7 Hz, H<sub>27a</sub>), 3.59 (2H, t, *J* = 6.7 Hz, H<sub>15</sub> × 2), 3.42 (1H, dd, *J* = 8.7, 4.7 Hz, H<sub>27b</sub>), 3.15 (1H, dqd, *J* = 9.3,



6.9, 4.9 Hz, H<sub>26</sub>), 2.88 (1H, d,  $J = 3.9$  Hz, C<sub>23</sub>OH), 2.72 (1H, qd,  $J = 7.1, 2.7$  Hz, H<sub>24</sub>), 1.50 (2H, app quint,  $J = 6.8$  Hz, H<sub>16</sub> × 2), 1.47–1.34 (2H, m, H<sub>22</sub> × 2), 1.34–1.18 (10H, m, H<sub>17–21</sub>), 1.05 (3H, d,  $J = 7.1$  Hz, Me<sub>24</sub>), 1.00 (3H, d,  $J = 6.9$  Hz, Me<sub>26</sub>), 0.89 (9H, s, SiC(CH<sub>3</sub>)<sub>3</sub>), 0.04 (6H, s, Si(CH<sub>3</sub>)<sub>2</sub>); <sup>13</sup>C NMR (125 MHz, CDCl<sub>3</sub>) δ<sub>C</sub> 218.1, 159.3, 129.6, 129.3, 113.8, 73.1, 72.9, 70.6, 63.3, 55.2, 50.9, 44.8, 33.6, 32.9, 29.6, 29.6, 29.4, 26.2, 25.9, 25.8, 18.3, 13.6, 8.8, –5.3; [α]<sub>D</sub><sup>20</sup> –2.0 (*c* 0.10, CHCl<sub>3</sub>); IR (thin film) ν<sub>max</sub> (cm<sup>-1</sup>) 3500, 2929, 2853, 1709, 1615, 1514, 1461, 1360, 1302, 1249, 1173, 1037, 1005, 991, 834, 777; HRMS calc. for C<sub>29</sub>H<sub>56</sub>NO<sub>5</sub>Si [M+NH<sub>4</sub>]<sup>+</sup> 526.3922, found 526.3909.

The configuration at C<sub>23</sub> was confirmed by synthesising the diastereomeric Mosher esters (*S/R*-MTPA-15) for analysis:

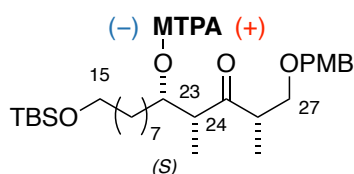

To a solution of alcohol **15** (10.1 mg, 19.8 μmol) and (*S*)-α-methoxy-α-trifluoromethylphenylacetic acid (13.9 mg, 59.4 μmol) in CH<sub>2</sub>Cl<sub>2</sub> (1 mL) was added DCC (60 μL, 1.0 M in CH<sub>2</sub>Cl<sub>2</sub>, 60.0 μmol) followed by DMAP (8.4 mg, 68.8 μmol). The reaction was stirred at rt for 19 h, then filtered and concentrated. Flash chromatography (1:30 → 1:20 EtOAc/PE) gave the (*S*)-MTPA ester *S*-MTPA-**15** as a colourless oil (10.6 mg, 74%). The analogous procedure gave the (*R*)-MTPA ester *R*-MTPA-**15** in 47% yield.

*S*-MTPA-**15**:

R<sub>f</sub> 0.65 (1:4 EtOAc/PE); <sup>1</sup>H NMR (500 MHz, CDCl<sub>3</sub>) δ<sub>H</sub> 7.58–7.53 (2H, m, PhH), 7.40–7.36 (3H, m, PhH), 7.19 (2H, d,  $J = 8.6$  Hz, PMB ArH), 6.85 (2H, d,  $J = 8.7$  Hz, PMB ArH), 5.44 (1H, app dt,  $J = 7.6, 5.2$  Hz, H<sub>23</sub>), 4.39 (1H, d,  $J = 11.6$  Hz, ArCH<sub>a</sub>H<sub>b</sub>O), 4.33 (1H, d,  $J = 11.6$  Hz, ArCH<sub>a</sub>H<sub>b</sub>O), 3.79 (3H, s, ArOMe), 3.59 (2H, t,  $J = 6.7$  Hz, H<sub>15</sub> × 2), 3.56 (1H, dd,  $J = 8.9, 8.2$  Hz, H<sub>27a</sub>), 3.52 (3H, s, OMe), 3.39 (1H, dd,  $J = 9.0, 5.4$  Hz, H<sub>27b</sub>), 3.08–2.99 (1H, m, H<sub>26</sub>), 2.93 (1H, dq,  $J = 7.1, 6.7$  Hz, H<sub>24</sub>), 1.60–1.53 (1H, m, H<sub>22a</sub>), 1.53–1.43 (3H, m, H<sub>16</sub> × 2, H<sub>22b</sub>), 1.31–1.10 (10H, m, H<sub>17–21</sub>), 1.09 (3H, d,  $J = 7.2$  Hz, Me<sub>24</sub>), 1.03 (3H, d,  $J = 7.0$  Hz, Me<sub>26</sub>), 0.89 (9H, s, SiC(CH<sub>3</sub>)<sub>3</sub>), 0.05 (6H, s, Si(CH<sub>3</sub>)<sub>2</sub>).

## R-MTPA-15:

**R<sub>f</sub>** 0.65 (1:4 EtOAc/PE); **<sup>1</sup>H NMR** (500 MHz, CDCl<sub>3</sub>) δ<sub>H</sub> 7.59–7.52 (2H, m, PhH), 7.41–7.35 (3H, m, PhH), 7.19 (2H, d, *J* = 8.7 Hz, PMB ArH), 6.85 (2H, d, *J* = 8.7 Hz, PMB ArH), 5.42 (1H, app q, *J* = 6.1 Hz, H<sub>23</sub>), 4.38 (1H, d, *J* = 11.5 Hz, ArCH<sub>a</sub>H<sub>b</sub>O), 4.34 (1H, d, *J* = 11.6 Hz, ArCH<sub>a</sub>H<sub>b</sub>O), 3.79 (3H, s, ArOMe), 3.58 (2H, t, *J* = 6.7 Hz, H<sub>15</sub> × 2), 3.56–3.51 (4H, m, OMe, H<sub>27a</sub>), 3.36 (1H, dd, *J* = 9.0, 5.4 Hz, H<sub>27b</sub>), 3.00–2.92 (1H, m, H<sub>26</sub>), 2.90 (1H, dq, *J* = 7.3, 6.9 Hz, H<sub>24</sub>), 1.62–1.52 (2H, m, H<sub>22</sub> × 2), 1.48 (2H, app quint, *J* = 7.1 Hz, H<sub>16</sub> × 2), 1.31–1.12 (10H, m, H<sub>17–21</sub>), 1.02 (3H, d, *J* = 7.2 Hz, Me<sub>24</sub>), 0.97 (3H, d, *J* = 7.0 Hz, Me<sub>26</sub>), 0.89 (9H, s, SiC(CH<sub>3</sub>)<sub>3</sub>), 0.04 (6H, s, Si(CH<sub>3</sub>)<sub>2</sub>).

Table 1. Diagnostic <sup>1</sup>H NMR signals for the configurational assignment of 23S

| Proton | δH ( <i>S</i> )-MTPA (ppm) | δH ( <i>R</i> )-MTPA (ppm) | Δδ <sub>S-R</sub> (ppm) |
|--------|----------------------------|----------------------------|-------------------------|
| H22a   | 1.57                       | 1.60                       | -0.03                   |
| H22b   | 1.51                       | 1.60                       | -0.09                   |
| H23    | 5.44                       | 5.42                       | +0.02                   |
| H24    | 2.93                       | 2.90                       | +0.03                   |
| Me24   | 1.09                       | 1.02                       | +0.07                   |
| H26    | 3.04                       | 2.96                       | +0.08                   |
| Me26   | 1.03                       | 0.97                       | +0.06                   |

## Alcohol 16

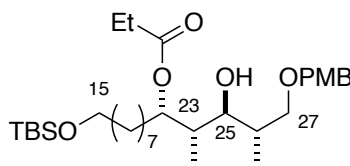

Freshly prepared SmI<sub>2</sub> (18.7 mL, *ca.* 0.1 M in THF, 1.87 mmol) was added dropwise to a solution of propionaldehyde (8.1 mL, 112 mmol, distilled from CaCl<sub>2</sub> immediately prior to use) in THF (120 mL) at 0 °C. The blue-green colour of SmI<sub>2</sub> faded upon addition to give a golden yellow solution, which was stirred at 0 °C for 15 min then cooled to -20 °C. Ketone **15** (9.34 g, 18.3 mmol) was dissolved in THF (70 mL) and added to the reaction mixture *via* cannula. The reaction was kept at -20 °C for 1 h, then quenched with NaHCO<sub>3</sub> (100 mL) and warmed

to rt. The aqueous fraction was extracted with Et<sub>2</sub>O (3 × 100 mL). The combined organics were dried over Na<sub>2</sub>SO<sub>4</sub>, concentrated *in vacuo*, and purified by flash chromatography (1:15 EtOAc/PE) to give alcohol **16** as a pale yellow oil (9.91 g, 95%, >20:1 *dr*).

**R<sub>f</sub>** 0.48 (1:5 EtOAc/PE); **<sup>1</sup>H NMR** (500 MHz, CDCl<sub>3</sub>) δ<sub>H</sub> 7.23 (2H, d, *J* = 8.6 Hz, ArH), 6.87 (2H, d, *J* = 8.6 Hz, ArH), 5.27 (1H, ddd, *J* = 8.7, 5.0, 1.5 Hz, H<sub>23</sub>), 4.43 (1H, d, *J* = 11.6 Hz, ArCH<sub>a</sub>H<sub>b</sub>O), 4.39 (1H, d, *J* = 11.6 Hz, ArCH<sub>a</sub>H<sub>b</sub>O), 3.80 (3H, s, ArOMe), 3.59 (2H, t, *J* = 6.6 Hz, H<sub>15</sub> × 2), 3.55 (1H, dd, *J* = 9.2, 5.1 Hz, H<sub>27a</sub>), 3.43 (1H, dd, *J* = 9.2, 5.8 Hz, H<sub>27b</sub>), 3.35 (1H, d, *J* = 5.7 Hz, C<sub>25</sub>OH), 3.10 (1H, ddd, *J* = 8.9, 5.7, 3.5 Hz, H<sub>25</sub>), 2.33 (2H, q, *J* = 7.6 Hz, H<sub>2</sub> × 2), 2.05–1.98 (1H, m, H<sub>26</sub>), 1.76 (1H, dqd, *J* = 8.5, 6.9, 1.3 Hz, H<sub>24</sub>), 1.72–1.63 (1H, m, H<sub>22a</sub>), 1.50 (2H, app quint, *J* = 6.9 Hz, H<sub>16</sub> × 2), 1.45–1.36 (1H, m, H<sub>22b</sub>), 1.34–1.20 (10H, m, H<sub>17–21</sub>), 1.14 (3H, t, *J* = 7.6 Hz, H<sub>3</sub> × 3), 1.06 (3H, d, *J* = 7.0 Hz, Me<sub>26</sub>), 0.89 (9H, s, Si(CH<sub>3</sub>)<sub>3</sub>), 0.87 (3H, d, *J* = 6.9 Hz, Me<sub>24</sub>), 0.04 (6H, s, Si(CH<sub>3</sub>)<sub>2</sub>); **<sup>13</sup>C NMR** (125 MHz, CDCl<sub>3</sub>) δ<sub>C</sub> 175.3, 159.1, 130.4, 129.1, 113.7, 76.3, 73.7, 72.9, 71.7, 63.3, 55.2, 40.2, 34.7, 32.8, 32.6, 29.5, 29.4, 29.3, 27.8, 26.0, 26.0, 25.7, 18.3, 16.3, 10.1, 9.3, –5.3; [ $\alpha$ ]<sub>D</sub><sup>20</sup> –3.5 (*c* 1.00, CHCl<sub>3</sub>); **IR** (thin film)  $\nu_{max}$  (cm<sup>–1</sup>) 3504, 2929, 2849, 1728, 1711, 1617, 1514, 1463, 1364, 1247, 1203, 1096, 1039, 1001, 832, 777; **HRMS** calc. for C<sub>32</sub>H<sub>62</sub>NO<sub>6</sub>Si [M+NH<sub>4</sub>]<sup>+</sup> 584.4341, found 584.4325.

### Methyl ether **16a**

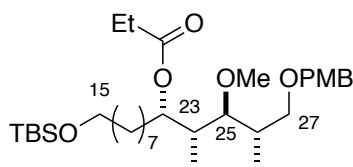

Proton Sponge (9.30 g, 43.4 mmol) and Me<sub>3</sub>O·BF<sub>4</sub> (4.28 g, 28.9 mmol) were charged to a flask in an argon-filled glove box, then a solution of alcohol **16** (8.17 g, 14.4 mmol) in CH<sub>2</sub>Cl<sub>2</sub> (300 mL) was added at rt. The reaction was stirred for 3 h, during which time it gradually turned yellow, then bright orange. The mixture was then quenched by addition of NH<sub>4</sub>Cl (150 mL) and stirred overnight. The aqueous layer was extracted with CH<sub>2</sub>Cl<sub>2</sub> (3 × 100 mL), then the combined organics were washed with citric acid (2 × 200 mL, 10% w/v aq.), dried over MgSO<sub>4</sub>, and concentrated *in vacuo*. Purification by flash chromatography (1:20 EtOAc/PE) provided the methyl ether **16a** as a colourless oil (7.42 g, 89%, 99% brsm).

**R<sub>f</sub>** 0.48 (1:8 EtOAc/PE); **<sup>1</sup>H NMR** (500 MHz, CDCl<sub>3</sub>) δ<sub>H</sub> 7.24 (2H, d, *J* = 8.7 Hz, ArH), 6.86 (2H, d, *J* = 8.7 Hz, ArH), 5.18 (1H, app td, *J* = 7.4, 2.0 Hz, H<sub>23</sub>), 4.43 (1H, d, *J* = 11.5 Hz, ArCH<sub>a</sub>H<sub>b</sub>O), 4.39 (1H, d, *J* = 11.6 Hz, ArCH<sub>a</sub>H<sub>b</sub>O), 3.80 (3H, s, ArOMe), 3.59 (2H, t, *J* = 6.7 Hz, H<sub>15</sub> × 2), 3.53 (1H, dd, *J* = 9.2, 4.9 Hz, H<sub>27a</sub>), 3.38 (3H, s, C<sub>25</sub>OMe), 3.32 (1H, dd, *J* = 9.1,

7.3 Hz, H<sub>27b</sub>), 2.87 (1H, dd,  $J = 8.5, 3.6$  Hz, H<sub>25</sub>), 2.31 (2H, q,  $J = 7.6$  Hz, H<sub>2</sub> × 2), 2.12–2.04 (1H, m, H<sub>26</sub>), 1.78 (1H, dqd,  $J = 8.9, 7.0, 2.0$  Hz, H<sub>24</sub>), 1.66–1.58 (1H, m, H<sub>22a</sub>), 1.49 (2H, app quint,  $J = 7.0$  Hz, H<sub>16</sub> × 2), 1.46–1.39 (1H, m, H<sub>22b</sub>), 1.33–1.19 (10H, m, H<sub>17–21</sub>), 1.14 (3H, t,  $J = 7.6$  Hz, H<sub>3</sub> × 3), 1.06 (3H, d,  $J = 7.1$  Hz, Me<sub>26</sub>), 0.92–0.88 (12H, m, Me<sub>24</sub>, SiC(CH<sub>3</sub>)<sub>3</sub>), 0.04 (6H, s, Si(CH<sub>3</sub>)<sub>2</sub>); <sup>13</sup>C NMR (125 MHz, CDCl<sub>3</sub>) δ<sub>C</sub> 174.1, 159.0, 130.8, 129.0, 113.7, 85.9, 73.2, 72.7, 71.6, 63.3, 61.3, 55.2, 38.8, 35.9, 32.9, 32.7, 29.5, 29.5, 29.4, 28.0, 26.0, 25.8, 25.7, 18.4, 16.3, 10.6, 9.4, –5.3; [α]<sub>D</sub><sup>20</sup> –4.4 (*c* 0.79, CHCl<sub>3</sub>); IR (thin film) ν<sub>max</sub> (cm<sup>–1</sup>) 2932, 2858, 1732, 1614, 1513, 1463, 1247, 1193, 1090, 1038, 834, 776; HRMS calc. for C<sub>33</sub>H<sub>64</sub>NO<sub>6</sub>Si [M+NH<sub>4</sub>]<sup>+</sup> 598.4497, found 598.4482.

### Alcohol 16b

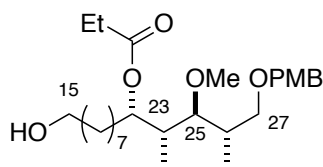

Methyl ether **16a** (2.03 g, 3.49 mmol) was dissolved in THF (50 mL) and cooled to 0 °C. HCl (30 mL, 1.0 M aq.) was added, then the reaction was stirred at rt. After 1 h the reaction was quenched by careful addition of NaHCO<sub>3</sub> (80 mL) with cooling in an ice bath. The resulting mixture was then diluted with H<sub>2</sub>O (100 mL) and Et<sub>2</sub>O (50 mL) and extracted with Et<sub>2</sub>O (3 × 100 mL). The combined organics were dried over Na<sub>2</sub>SO<sub>4</sub>, concentrated *in vacuo*, and purified by flash chromatography (1:3 EtOAc/PE) to give alcohol **16b** as a colourless oil (1.62 g, 99%).

R<sub>f</sub> 0.15 (1:3 EtOAc/PE); <sup>1</sup>H NMR (500 MHz, CDCl<sub>3</sub>) δ<sub>H</sub> 7.24 (2H, d,  $J = 8.5$  Hz, ArH), 6.86 (2H, d,  $J = 8.5$  Hz, ArH), 5.18 (1H, app td,  $J = 7.0, 1.6$  Hz, H<sub>23</sub>), 4.42 (1H, d,  $J = 11.6$  Hz, ArCH<sub>a</sub>H<sub>b</sub>O), 4.39 (1H, d,  $J = 11.5$  Hz, ArCH<sub>a</sub>H<sub>b</sub>O), 3.80 (3H, s, ArOMe), 3.62 (2H, t,  $J = 6.6$  Hz, H<sub>15</sub> × 2), 3.53 (1H, dd,  $J = 9.2, 4.8$  Hz, H<sub>27a</sub>), 3.37 (3H, s, C<sub>25</sub>OMe), 3.32 (1H, dd,  $J = 9.0, 7.4$  Hz, H<sub>27b</sub>), 2.86 (1H, dd,  $J = 8.5, 3.5$  Hz, H<sub>25</sub>), 2.31 (2H, q,  $J = 7.6$  Hz, H<sub>2</sub> × 2), 2.12–2.04 (1H, m, H<sub>26</sub>), 1.78 (1H, dqd,  $J = 8.6, 7.1, 1.6$  Hz, H<sub>24</sub>), 1.69–1.59 (1H, m, H<sub>22a</sub>), 1.55 (2H, app quint,  $J = 6.9$  Hz, H<sub>16</sub> × 2), 1.47–1.39 (1H, m, H<sub>22b</sub>), 1.39–1.19 (10H, m, H<sub>17–21</sub>), 1.14 (3H, t,  $J = 7.6$  Hz, H<sub>3</sub> × 3), 1.05 (3H, d,  $J = 7.0$  Hz, Me<sub>26</sub>), 0.90 (3H, d,  $J = 7.0$  Hz, Me<sub>24</sub>); <sup>13</sup>C NMR (125 MHz, CDCl<sub>3</sub>) δ<sub>C</sub> 174.1, 159.0, 130.8, 129.0, 113.7, 85.9, 73.1, 72.7, 71.6, 63.0, 61.4, 55.2, 38.8, 35.9, 32.7, 32.7, 29.4, 29.3, 29.2, 28.0, 25.6, 25.6, 16.3, 10.6, 9.4; [α]<sub>D</sub><sup>20</sup> –8.0 (*c* 0.10, D CHCl<sub>3</sub>); IR (thin film) ν<sub>max</sub> (cm<sup>–1</sup>) 3452, 2972, 2933, 2857, 1730, 1613, 1588, 1514, 1463, 1423, 1364, 1300, 1247, 1195, 1086, 1037, 1003, 820; HRMS calc. for C<sub>27</sub>H<sub>47</sub>O<sub>6</sub> [M+H]<sup>+</sup> 467.3367, found 467.3359.

## Aldehyde 12

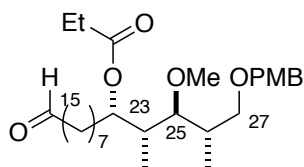

Oxalyl chloride (381  $\mu\text{L}$ , 4.50 mmol) and  $\text{CH}_2\text{Cl}_2$  (40 mL) were charged to a flask and cooled to  $-78\text{ }^\circ\text{C}$ . DMSO (426  $\mu\text{L}$ , 6.00 mmol) was added dropwise, and the mixture was stirred for 30 min. A solution of alcohol **16b** (1.41 g, 3.03 mmol) in  $\text{CH}_2\text{Cl}_2$  (20 mL) was added and stirring continued for 20 min. After addition of  $\text{Et}_3\text{N}$  (1.25 mL, 9.00 mmol), the reaction was warmed to rt and stirred for 1.5 h. Addition of  $\text{NH}_4\text{Cl}$  (60 mL) to quench was followed by extraction with  $\text{Et}_2\text{O}$  ( $3 \times 50\text{ mL}$ ). The combined organics were washed with HCl (100 mL, 0.5 M aq.), brine (100 mL), and  $\text{NaHCO}_3$  (100 mL), then dried over  $\text{MgSO}_4$  and concentrated *in vacuo*. The product could be used crude or purified by flash chromatography (1:8 EtOAc/PE) to yield the aldehyde **12** as a colourless oil (1.32 g, 94%).

**R<sub>f</sub>** 0.45 (1:3 EtOAc/PE); **<sup>1</sup>H NMR** (500 MHz,  $\text{CDCl}_3$ )  $\delta_{\text{H}}$  9.75 (1H, t,  $J = 1.8\text{ Hz}$ , H<sub>15</sub>), 7.24 (2H, d,  $J = 8.6\text{ Hz}$ , ArH), 6.86 (2H, d,  $J = 8.7\text{ Hz}$ , ArH), 5.17 (1H, app td,  $J = 7.0, 1.9\text{ Hz}$ , H<sub>23</sub>), 4.43 (1H, d,  $J = 11.5\text{ Hz}$ , ArCH<sub>2</sub>O), 4.39 (1H, d,  $J = 11.6\text{ Hz}$ , ArCH<sub>2</sub>O), 3.80 (3H, s, ArOMe), 3.53 (1H, dd,  $J = 9.2, 4.9\text{ Hz}$ , H<sub>27a</sub>), 3.38 (3H, s, C<sub>25</sub>OMe), 3.32 (1H, dd,  $J = 9.1, 7.4\text{ Hz}$ , H<sub>27b</sub>), 2.86 (1H, dd,  $J = 8.5, 3.5\text{ Hz}$ , H<sub>25</sub>), 2.40 (2H, td,  $J = 7.4, 1.8\text{ Hz}$ , H<sub>16</sub>  $\times 2$ ), 2.31 (2H, q,  $J = 7.6\text{ Hz}$ , H<sub>2</sub>  $\times 2$ ), 2.12–2.04 (1H, m, H<sub>26</sub>), 1.78 (1H, dqd,  $J = 8.9, 7.0, 1.9\text{ Hz}$ , H<sub>24</sub>), 1.66–1.58 (3H, m, H<sub>17</sub>  $\times 2$ , H<sub>22a</sub>), 1.47–1.38 (1H, m, H<sub>22b</sub>), 1.33–1.20 (8H, m, H<sub>18-21</sub>), 1.14 (3H, t,  $J = 7.6\text{ Hz}$ , H<sub>3</sub>  $\times 3$ ), 1.05 (3H, d,  $J = 7.0\text{ Hz}$ , Me<sub>26</sub>), 0.90 (3H, d,  $J = 7.0\text{ Hz}$ , Me<sub>24</sub>); **<sup>13</sup>C NMR** (125 MHz,  $\text{CDCl}_3$ )  $\delta_{\text{C}}$  202.9, 174.1, 159.0, 130.8, 129.0, 113.7, 85.9, 73.1, 72.7, 71.6, 61.4, 55.3, 43.9, 38.8, 35.9, 32.7, 29.3, 29.2, 29.0, 28.0, 25.6, 22.0, 16.3, 10.6, 9.4;  $[\alpha]_{\text{D}}^{20} -5.6$  ( $c$  0.65,  $\text{CHCl}_3$ ); **IR** (thin film)  $\nu_{\text{max}}$  ( $\text{cm}^{-1}$ ) 2936, 2858, 1726, 1614, 1511, 1461, 1364, 1247, 1195, 1088, 1038, 822; **HRMS** calc. for  $\text{C}_{27}\text{H}_{48}\text{O}_6\text{N}$   $[\text{M}+\text{NH}_4]^+$  482.3476, found 482.3471.

### 3.2. Synthesis of the C28-C34 side chain *E*-11

#### Aldol adduct **17**

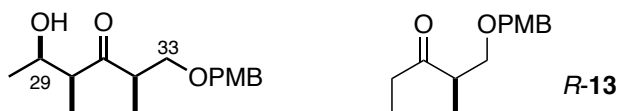

To a solution of  $\text{TiCl}_4$  (175  $\mu\text{L}$ , 1.78 mmol) in  $\text{CH}_2\text{Cl}_2$  (8.4 mL) at 0 °C was added  $\text{Ti}(\text{O}-i\text{Pr})_4$  (175  $\mu\text{L}$ , 0.59 mmol). The mixture was stirred at 0 °C for 10 min, then at rt for 20 min. The resulting colourless solution was added dropwise to a solution of ketone **R-13** (500 mg, 2.12 mmol, dried under vacuum for 2 h and stirred over  $\text{CaH}_2$  immediately prior to use) in  $\text{CH}_2\text{Cl}_2$  (13 mL) at  $-78$  °C. To the yellow solution was added  $i\text{-PrNEt}_2$  (0.41 mL) dropwise and the reaction mixture was allowed to enolise at  $-78$  °C for 30 min. Acetaldehyde (1.12 mL, 21.2 mmol, distilled from  $\text{CaCl}_2$  immediately prior to use) was dissolved in  $\text{CH}_2\text{Cl}_2$  (10 mL) and added to the reaction mixture dropwise, causing the deep red solution to gradually turn pale orange. The mixture was stirred at  $-78$  °C for 30 min before MeOH (8 mL) was added. After warming to rt  $\text{Na}^+/\text{K}^+$  tartrate was added (20 mL) and the biphasic mixture was vigorously stirred overnight. The layers were separated, and the organic phase washed with brine (20 mL) and the combined aqueous layers were extracted with  $\text{CH}_2\text{Cl}_2$  ( $3 \times 20$  mL). The combined organics were dried ( $\text{Na}_2\text{SO}_4$ ) and concentrated *in vacuo* and purified by flash column chromatography (1:3 EtOAc/PE) to give aldol adduct **17** as a colourless oil (456 mg, 77%, 17:1 *dr*).

$R_f$  0.24 (3:1EtOAc/PE);  $^1\text{H NMR}$  (400 MHz,  $\text{CDCl}_3$ )  $\delta_{\text{H}}$  7.18 (2H, d,  $J = 8.6$  Hz, ArH), 6.87 (2H, d,  $J = 8.9$  Hz, ArH), 4.39 (2H, ABq,  $J = 8.6$  Hz,  $\text{OCH}_2\text{Ar}$ ), 4.19 (1H, qdd,  $J = 6.6, 4.1, 3.2$  Hz,  $\text{H}_{29}$ ), 3.80 (3H, s, OMe), 3.61 (1H, t,  $J = 9.1$  Hz,  $\text{H}_{33a}$ ), 3.42 (1H, dd,  $J = 8.7, 4.6$  Hz,  $\text{H}_{33b}$ ), 3.15 (1H, dqd,  $J = 9.4, 7.0, 4.7$  Hz,  $\text{H}_{32}$ ), 2.94 (1H, d,  $J = 4.2$  Hz, OH), 2.73 (1H, qd,  $J = 7.1, 3.0$  Hz,  $\text{H}_{30}$ ), 1.12 (3H, d,  $J = 6.7$  Hz,  $\text{Me}_{28}$ ), 1.08 (3H, d,  $J = 7.1$  Hz,  $\text{Me}_{30}$ ), 1.00 (3H, d,  $J = 6.7$  Hz,  $\text{Me}_{32}$ ).

These data are in agreement with those reported by Fink *et al.*<sup>8</sup>

## Alcohol 18

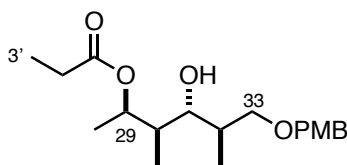

To a solution of propionaldehyde (freshly distilled from  $\text{CaCl}_2$ , 1.54 mL, 21.4 mmol) in THF (20 mL) at 0 °C was added freshly prepared  $\text{SmI}_2$  (2.56 mL, 0.1 M in THF, 0.256 mmol). The solution was stirred for 5 min until the deep blue colouration had subsided. A solution of aldol adduct **17** (1.00 g, 3.57 mmol) in THF (10 mL) was then added *via* cannula. The reaction was stirred at 0 °C for 1 h, before being quenched with  $\text{NaHCO}_3$  (10 mL) and extracted with  $\text{Et}_2\text{O}$  ( $3 \times 10$  mL). The combined organic layers were dried ( $\text{MgSO}_4$ ), concentrated *in vacuo* and purified by flash column chromatography (1:4 EtOAc/PE) to give alcohol **18** as a colourless oil (1.17 g, 97%, >95:5 *dr*).

$R_f$  0.31 (1:4 EtOAc/PE);  $^1\text{H NMR}$  (400 MHz,  $\text{CDCl}_3$ )  $\delta_{\text{H}}$  7.23 (2H, d,  $J = 8.4$  Hz, ArH), 6.87 (2H, d,  $J = 8.7$  Hz, ArH), 5.40 (1H, qd,  $J = 6.6, 2.1$  Hz,  $\text{H}_{29}$ ), 4.41 (2H, ABq,  $J = 11.6$  Hz,  $\text{OCH}_2\text{Ar}$ ), 3.80 (3H, s, OMe), 3.54-3.48 (2H, m,  $\text{H}_{33} \times 2$ ), 3.21-3.15 (2H, m,  $\text{H}_{31}$ , OH), 2.30 (2H, q,  $J = 7.7$  Hz,  $\text{H}_2 \times 2$ ), 2.03-1.94 (1H, m,  $\text{H}_{32}$ ), 1.70-1.59 (1H, m,  $\text{H}_{30}$ ), 1.22 (3H, d,  $J = 6.7$  Hz,  $\text{Me}_{28}$ ), 1.12 (3H, t,  $J = 7.5$  Hz,  $\text{H}_3 \times 3$ ), 1.08 (3H, d,  $J = 7.0$  Hz,  $\text{Me}_{32}$ ), 0.89 (3H, t,  $J = 6.9$  Hz,  $\text{Me}_{30}$ ).

These data are in agreement with those reported by Fink *et al.*<sup>8</sup>

## Methyl ether 18a

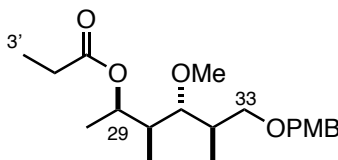

To a solution of Meerwein salt ( $\text{Me}_3\text{OBF}_4$ , 874 mg, 5.92 mmol) and Proton Sponge® (1.90 g, 8.88 mmol) in  $\text{CH}_2\text{Cl}_2$  (50 mL) was added alcohol **18** (1.00 g, 2.96 mmol). The reaction was stirred for 4 h before being quenched with  $\text{NH}_4\text{Cl}$  (100 mL). The layers were separated, and the aqueous phase extracted with  $\text{CH}_2\text{Cl}_2$  ( $3 \times 50$  mL). The combined organic layers were dried ( $\text{MgSO}_4$ ), concentrated *in vacuo* and purified by flash column chromatography (1:4 EtOAc/PE) to give methyl ether **18a** as a colourless oil (0.939 g, 90%).

$R_f$  0.29 (1:3 EtOAc/PE);  $^1\text{H NMR}$  (400 MHz,  $\text{CDCl}_3$ )  $\delta_{\text{H}}$  7.24 (2H, d,  $J = 8.6$  Hz, ArH), 6.87 (2H, d,  $J = 8.6$  Hz, ArH), 5.27-5.20 (1H, m,  $\text{H}_{29}$ ), 4.41 (2H, ABq,  $J = 11.7$  Hz,  $\text{OCH}_2\text{Ar}$ ), 3.80 (3H, s, OMe), 3.54 (1H, dd,  $J = 9.1, 4.9$  Hz,  $\text{H}_{33a}$ ), 3.36 (3H, s,  $\text{OMeAr}$ ), 3.31 (1H, dd,  $J = 8.7,$

2.3 Hz, H<sub>33b</sub>), 2.89 (1H, dd,  $J = 8.8, 3.2$  Hz, H<sub>31</sub>), 2.30 (2H, q,  $J = 7.8$  Hz, H<sub>2'</sub> × 2), 2.12-2.03 (1H, m, H<sub>32</sub>), 1.74-1.66 (1H, m, H<sub>30</sub>), 1.21 (3H, d,  $J = 6.0$  Hz, Me<sub>28</sub>), 1.21 (3H, t,  $J = 7.6$  Hz, H<sub>3'</sub> × 3), 1.10 (3H, d,  $J = 6.7$  Hz, Me<sub>32</sub>), 0.94 (3H, t,  $J = 7.4$  Hz, Me<sub>30</sub>). <sup>13</sup>C NMR (125 MHz, CDCl<sub>3</sub>)  $\delta_C$  173.8, 158.9, 130.7, 128.9, 113.6, 85.9, 72.6, 71.3, 69.6, 61.3, 55.1, 40.8, 35.8, 27.9, 18.2, 16.2, 10.3, 9.2;  $[\alpha]_D^{20} +2.3$  (c 0.98, CHCl<sub>3</sub>); IR (thin film)  $\nu_{max}$  (cm<sup>-1</sup>) 2974, 2937, 1731, 1613, D 1513, 1462, 1367, 1302, 1246, 1195, 1172, 1083, 1036, 1011, 819; HRMS calc. for C<sub>20</sub>H<sub>36</sub>O<sub>5</sub>N [M+NH<sub>4</sub>]<sup>+</sup> 370.2588, found 370.2589.

### Alcohol 18b

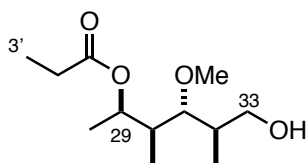

To a solution of PMB ether **18a** (380 mg, 1.08 mmol) in CH<sub>2</sub>Cl<sub>2</sub> (12 mL) was added pH 7.0 buffer (6 mL) and DDQ (490 mg, 2.16 mmol) at 0 °C. The reaction was warmed to rt and stirred for 1 h before being quenched with NaHCO<sub>3</sub> (15 mL). The layers were separated, and the aqueous phase was extracted with EtOAc (3 × 15 mL). The combined organics were dried (Na<sub>2</sub>SO<sub>4</sub>) and concentrated *in vacuo*. The crude material was purified by flash column chromatography (1:3 EtOAc/PE) to yield alcohol **18b** as a colourless oil (245 mg, 93%).

R<sub>f</sub> 0.21 (1:3 EtOAc/PE); <sup>1</sup>H NMR (500 MHz, CDCl<sub>3</sub>)  $\delta_H$  5.24 (1H, dq,  $J = 6.5, 2.5$  Hz, H<sub>29</sub>), 3.84-3.78 (1H, m, H<sub>33a</sub>), 3.58-3.52 (1H, m, H<sub>33b</sub>), 3.47 (3H, s, OMe), 2.98 (1H, dd,  $J = 8.8, 3.2$  Hz, H<sub>31</sub>), 2.78 (1H, br s, OH), 2.32 (2H, q,  $J = 7.8$  Hz, H<sub>2'</sub> × 2), 1.92-1.85 (1H, m, H<sub>32</sub>), 1.82-1.75 (1H, m, H<sub>30</sub>), 1.24 (3H, d,  $J = 6.5$  Hz, Me<sub>28</sub>), 1.15 (3H, d,  $J = 7.2$  Hz, Me<sub>32</sub>), 1.14 (3H, t,  $J = 7.5$  Hz, H<sub>3'</sub> × 3), 0.92 (3H, d,  $J = 7.0$  Hz, Me<sub>30</sub>). <sup>13</sup>C NMR (125 MHz, CDCl<sub>3</sub>)  $\delta_C$  173.9, 88.6, 69.6, 64.5, 61.7, 41.3, 36.0, 28.0, 18.3, 16.0, 10.3, 9.2;;  $[\alpha]_D^{20} 8.8$  (c 1.00, CHCl<sub>3</sub>); IR (thin film)  $\nu_{max}$  (cm<sup>-1</sup>) 3425, 2977, 2938, 2881, 2829, 1731, 1462, 1376, 1276, 1194, 1158, 1123, 1083, 1032, 966, 936, 870, 807; HRMS calc. for C<sub>12</sub>H<sub>25</sub>O<sub>4</sub> [M+H]<sup>+</sup> 233.1747, found 233.1749.

### Diol 19

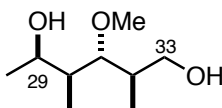

To a solution of ester **18b** (233 mg, 1.00 mmol) in CH<sub>2</sub>Cl<sub>2</sub> (10 mL) was added DIBAL (4 mL, 4.00 mmol, 1.0 M in CH<sub>2</sub>Cl<sub>2</sub>) at -78 °C. Upon completion, the reaction was quenched with



Na<sup>+</sup>/K<sup>+</sup> tartrate (20 mL) and allowed to warm to rt. The layers were separated and the aqueous was extracted with CH<sub>2</sub>Cl<sub>2</sub> (4 × 30 mL) and the combined organics were dried (Na<sub>2</sub>SO<sub>4</sub>) and concentrated *in vacuo*. The crude was purified by flash column chromatography (1:1 EtOAc/PE) to afford diol **19** as a colourless oil (153 mg, 87%).

**R<sub>f</sub>** 0.20 (1:1 EtOAc/PE); **<sup>1</sup>H NMR** (500 MHz, CDCl<sub>3</sub>)  $\delta_{\text{H}}$  4.19 (1H, q,  $J = 6.7$  Hz, H<sub>29</sub>), 3.76-3.64 (2H, m, H<sub>33</sub> × 2), 3.56 (3H, s, OMe), 3.18 (1H, dd,  $J = 7.7, 4.5$  Hz, H<sub>31</sub>), 2.95 (1H, br s, OH), 2.27 (1H, br s, OH), 2.02-1.95 (1H, m, H<sub>32</sub>), 1.71-1.64 (1H, m, H<sub>30</sub>), 1.56 (3H, d,  $J = 6.4$  Hz, Me<sub>28</sub>), 1.03 (3H, d,  $J = 7.2$  Hz, Me<sub>32</sub>), 0.96 (3H, d,  $J = 6.7$  Hz, Me<sub>30</sub>); **<sup>13</sup>C NMR** (125 MHz, CDCl<sub>3</sub>)  $\delta_{\text{C}}$  90.6, 66.6, 65.3, 61.8, 39.7, 37.6, 20.7, 14.9, 11.0;  $[\alpha]_{\text{D}}^{20} +8.5$  ( $c$  1.00, CHCl<sub>3</sub>); **IR** (thin film)  $\nu_{\text{max}}$  (cm<sup>-1</sup>) 3217, 2972, 2930, 1456, 1370, 1076, 1032, 1010, 998, 937, 900; **HRMS** calc. for C<sub>9</sub>H<sub>20</sub>O<sub>3</sub>Na [M+Na]<sup>+</sup> 199.1305, found 199.1299.

### Enamide *E/Z*-**11**

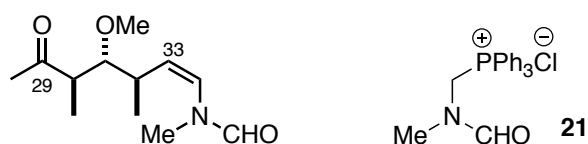

To a solution of DMSO (0.52 mL, 7.38 mmol) in CH<sub>2</sub>Cl<sub>2</sub> (10 mL) at -78 °C was added oxalyl chloride (0.31 mL, 3.69 mmol). After stirring for 30 min, a solution of diol **19** (216 mg, 1.23 mmol) in CH<sub>2</sub>Cl<sub>2</sub> (10 mL) was added. The mixture was stirred for 30 min and then triethylamine (2.06 mL, 14.7 mmol) was added. The reaction mixture was stirred at -78 °C for 30 min, then warmed to rt for 1 h before being quenched with NH<sub>4</sub>Cl solution (15 mL). The layers were separated, and the aqueous phase was extracted with Et<sub>2</sub>O (3 × 15 mL). The combined organics were dried over MgSO<sub>4</sub> and concentrated *in vacuo* to afford aldehyde **20** (180 mg, 85%) which was used immediately crude in the subsequent Wittig reaction.

To a suspension of phosphonium salt **21** (4.48 g, 11.3 mmol) in THF (25 mL) at -78 °C was added freshly prepared LiHMDS (12.5 mL, 1.0 M in THF, 12.5 mmol). The ylide solution was stirred at -78 °C for 30 min, warmed to -40 °C and stirred for 30 min, warmed to -20 °C and stirred for 30 min and finally warmed to 0 °C for 20 min after which the yellow suspension was cooled back down to -78 °C. A solution of ketoaldehyde **20** (976 mg, 5.67 mmol, pre-dried over CaH<sub>2</sub> for 1 h) in THF (25 mL) was added slowly. The reaction mixture was stirred at -78 °C for 2 h before being quenched with pH 7.0 buffer (50 mL) and diluted with Et<sub>2</sub>O (10 mL). The layers were separated and the aqueous layer extracted with EtOAc (3 × 50 mL). The combined organics were dried over MgSO<sub>4</sub> and concentrated *in vacuo*. The crude material was purified by flash column chromatography (1:1 EtOAc/PE) to afford enamide *E/Z*-**11** as a pale

yellow oil as an inseparable mixture of geometric isomers (800 mg, 62% over 2 steps, 3:1 *Z/E*).

While a full characterisation has been carried out for enamide *E/Z*-**11**, an analytically pure sample for spectroscopic characterisation was obtained, and a spectroscopically pure sample was only obtained for *E*-**11** after the I<sub>2</sub>-mediated isomerisation, described below.

**R<sub>f</sub>** 0.27 (1:1 EtOAc/PE); **<sup>1</sup>H NMR** (500 MHz, CDCl<sub>3</sub>)  $\delta_{\text{H}}$  8.10 (0.85H, s, NCHO), [8.01] (0.1H, s, NCHO\*), [6.19] (0.12H, d, *J* = 9.1 Hz, H<sub>34</sub>\*), 5.92 (0.81H, d, *J* = 8.7 Hz, H<sub>34</sub>), 5.27 (0.84H, dd, *J* = 10.8, 8.7 Hz, H<sub>33</sub>), [5.24-5.19] (0.13H, m, H<sub>33</sub>\*), 3.32 (3H, s, OMe), 3.20 (1H, dd, *J* = 9.4, 3.1 Hz, H<sub>31</sub>), [2.98] (0.15H, s, NMe\*), 2.95 (2.45H, s, NMe), [2.74-2.68] (0.16H, m, H<sub>32</sub>\*), 2.67-2.57 (2H, m, H<sub>32</sub>, H<sub>30</sub>), 2.14 (3H, s, Me<sub>28</sub>), 1.09 (3H, d, *J* = 7.0 Hz, Me<sub>30</sub>), [0.88] (0.67H, d, *J* = 7.0 Hz, Me<sub>32</sub>\*), 0.84 (2.40H, d, *J* = 7.0 Hz, Me<sub>32</sub>); **<sup>13</sup>C NMR** (125 MHz, CDCl<sub>3</sub>)  $\delta_{\text{C}}$  [212.4], 211.8, 162.5, [162.4], 127.7, 125.1, [124.5], [124.1], [87.2], 86.9, [61.2], 61.3, [49.7], 49.8, 36.2, [34.9], 33.8, 31.5, [31.1], 30.9, 19.0, [18.3], [13.4], 13.2;  $[\alpha]_{\text{D}}^{20}$  +11.0 (*c* 1.00, CHCl<sub>3</sub>); **IR** (thin film)  $\nu_{\text{max}}$  (cm<sup>-1</sup>) 2972, 2929, 1682, 1653, 1457, 1355, 1088, 1054; **HRMS** calc. for C<sub>12</sub>H<sub>21</sub>NO<sub>3</sub>Na [M+Na]<sup>+</sup> 250.1414, found 250.1412.

Distinguishable resonances of the minor rotamer (3:1 ratio) are given in brackets and assignments denoted with an asterisk.

### C28-C34 fragment *E*-**11**

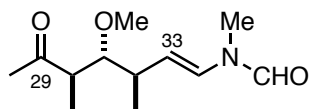

Enamide *E/Z*-**86** (810 mg, 3.56 mmol) was dissolved in CH<sub>2</sub>Cl<sub>2</sub> (100 mL) and a solution of iodine (45 mg, 0.18 mmol) in CH<sub>2</sub>Cl<sub>2</sub> (20 mL) was added. The reaction mixture was stirred in the dark at room temperature for 16 h before being quenched with sodium thiosulfate (100 mL, sat. aq.). The biphasic mixture was stirred rapidly for 2 h and the organic layer separated. The aqueous phase was extracted with CH<sub>2</sub>Cl<sub>2</sub> (3 × 50 mL) and the combined organics dried (MgSO<sub>4</sub>) and concentrated *in vacuo*. The crude was purified by flash column chromatography (1:1 EtOAc/PE) to afford (*E*)-enamide **11** as a pale-yellow oil (700 mg, 86%, >20:1 *E/Z*).

**R<sub>f</sub>** 0.27 (1:1 EtOAc/PE); **<sup>1</sup>H NMR** (500 MHz, CDCl<sub>3</sub>)  $\delta_{\text{H}}$  8.25 (0.59H, s, NCHO), [8.04] (0.33H, s, NCHO\*), [7.09] (0.32H, d, *J* = 14.5 Hz, H<sub>34</sub>\*), 6.44 (0.59H, d, *J* = 14.5 Hz, H<sub>34</sub>), 5.09 (1H, dd, *J* = 14.5, 8.5 Hz, H<sub>33</sub>), 3.34 (3H, s, OMe), 3.26 (1H, dd, *J* = 10.5, 2.7 Hz, H<sub>31</sub>), [3.04] (1H, s, NMe\*), 3.00 (2H, s, NMe), 2.72-2.61 (1H, m, H<sub>32</sub>), 2.44-2.31 (1H, m, H<sub>30</sub>), 2.16 (3H, s, Me<sub>28</sub>), 1.12 (3H, d, *J* = 6.7 Hz, Me<sub>32</sub>), 0.92 (3H, d, *J* = 7.1 Hz, Me<sub>30</sub>); **<sup>13</sup>C NMR** (125 MHz, CDCl<sub>3</sub>)  $\delta_{\text{C}}$  [212.4], 212.3, 162.1, 160.8, 128.7, 124.7, [113.1], 111.3, [87.4], 87.3, 61.2, 61.2, [49.7], 49.6, 37.6, 37.5, 33.0, [31.0], 30.9, 29.6, 27.5, 19.3, [13.4], 13.3;  $[\alpha]_{\text{D}}^{20}$  -74.4 (*c*

0.84, CHCl<sub>3</sub>); **IR** (thin film)  $\nu_{max}$  (cm<sup>-1</sup>) 2964, 2928, 1691, 1651, 1457, 1353, 1318, 1275, 1193, 1170, 1092, 1068, 956, 725; **HRMS** calc. for C<sub>12</sub>H<sub>21</sub>NO<sub>3</sub>Na [M+Na]<sup>+</sup> 250.1414, found 250.1412.

Distinguishable resonances of the minor rotamer (2:1 ratio) are given in brackets and assignments denoted with an asterisk.

### 3.3. Fragment assembly and synthesis of the macrocycle 25

#### Enone 22

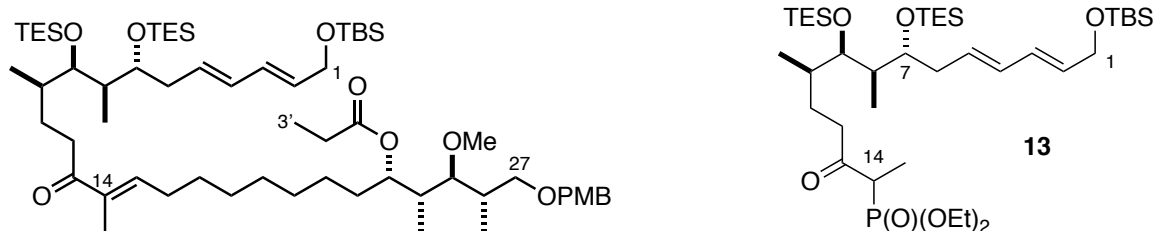

To Ba(OH)<sub>2</sub> (592 mg, 3.46 mmol) was added a solution of phosphonate **13** (2.24 g, 2.88 mmol, 3:1 mixture with regioisomer **77**) in THF (40 mL) and the suspension was stirred for 1 h at rt. Aldehyde **12** (1.10 g, 2.37 mmol) in THF/H<sub>2</sub>O (40:1, 25 mL) was added and the reaction was stirred for 72 h. The reaction was quenched by the addition of NH<sub>4</sub>Cl (75 mL) and the layers separated. The aqueous phase was extracted with EtOAc (3 × 100 mL) and the combined organics were dried (MgSO<sub>4</sub>) and concentrated *in vacuo*. The crude material was purified by flash column chromatography (1:5 → 1:4 EtOAc/PE) to yield enone **22** (1.96 g, 85% >20:1) as a colourless oil.

**R<sub>f</sub>** 0.76 (1:3 EtOAc/PE); **<sup>1</sup>H NMR** (500 MHz, CDCl<sub>3</sub>)  $\delta_{\text{H}}$  7.24 (2H, d,  $J = 8.5$  Hz, ArH), 6.86 (2H, d,  $J = 8.5$  Hz, ArH), 6.59 (1H, t,  $J = 7.1$  Hz, H<sub>15</sub>), 6.18 (1H, dd,  $J = 14.9, 10.5$  Hz, H<sub>3</sub>), 6.04 (1H, dd,  $J = 15.2, 10.5$  Hz, H<sub>4</sub>), 5.68 (1H, dt,  $J = 14.7, 7.5$  Hz, H<sub>5</sub>), 5.64 (1H, dt,  $J = 14.7, 5.7$  Hz, H<sub>2</sub>), 5.18 (1H, td,  $J = 6.7, 2.0$  Hz, H<sub>23</sub>), 4.41 (2H, ABq,  $J = 11.0$  Hz, OCH<sub>2</sub>Ar), 4.20 (2H, d,  $J = 5.1$  Hz, H<sub>1</sub> × 2), 3.80 (3H, s, OMe), 3.66-3.60 (1H, m, H<sub>7</sub>), 3.56-3.51 (2H, m, H<sub>9</sub>, H<sub>27a</sub>), 3.38 (3H, s, OMe), 3.32 (1H, dd,  $J = 8.9, 7.2$  Hz, H<sub>27b</sub>), 2.87 (1H, dd,  $J = 8.8, 3.8$  Hz, H<sub>25</sub>), 2.73 (1H, ddd,  $J = 15.7, 9.7, 6.0$  Hz, H<sub>12a</sub>), 2.56 (1H, ddd,  $J = 15.7, 9.7, 6.0$  Hz, H<sub>12b</sub>), 2.31 (2H, q,  $J = 7.6$  Hz, H<sub>2</sub> × 2), 2.21 (2H, q,  $J = 7.4$  Hz, H<sub>16</sub> × 2), 2.18-2.14 (2H, m, H<sub>6</sub> × 2), 2.11-2.06 (1H, m, H<sub>26</sub>), 1.81-1.70 (3H, m, H<sub>8</sub>, H<sub>11a</sub>, H<sub>24</sub>), 1.76 (3H, s, Me<sub>14</sub>), 1.67-1.58 (1H, m, H<sub>22a</sub>), 1.48-1.37 (4H, m, H<sub>11b</sub>, H<sub>22b</sub>, H<sub>17</sub> × 2), 1.34-1.20 (8H, m, H<sub>18-21</sub>), 1.14 (3H, t,  $J = 7.6$  Hz, H<sub>3</sub> × 3), 1.06 (3H, d,  $J = 7.1$  Hz, Me<sub>26</sub>), 0.95 (9H, t,  $J = 8.2$  Hz, Si(CH<sub>2</sub>CH<sub>3</sub>)<sub>3</sub>), 0.93 (9H, t,  $J =$

8.2 Hz, Si(CH<sub>2</sub>CH<sub>3</sub>)<sub>3</sub>), 0.92-0.89 (15H, m, SiC(CH<sub>3</sub>)<sub>3</sub>, Me<sub>24</sub>, Me<sub>10</sub>), 0.86 (3H, d, *J* = 6.9 Hz, Me<sub>8</sub>), 0.61 (6H, q, *J* = 7.8 Hz, Si(CH<sub>2</sub>CH<sub>3</sub>)<sub>3</sub>), 0.56 (6H, q, *J* = 7.5 Hz, Si(CH<sub>2</sub>CH<sub>3</sub>)<sub>3</sub>), 0.07 (6H, s, Si(CH<sub>3</sub>)<sub>2</sub>). <sup>13</sup>C NMR (125 MHz, CDCl<sub>3</sub>) δ<sub>C</sub> 202.1, 174.1, 159.0, 142.1, 137.1, 131.5, 131.4, 130.9, 130.3, 130.3, 129.0, 113.7, 85.9, 77.5, 74.5, 73.1, 72.8, 71.6, 63.7, 61.4, 55.2, 41.8, 38.9, 38.2, 36.0, 35.9, 35.4, 32.8, 29.5, 29.5, 29.4, 29.1, 28.7, 28.0, 26.9, 26.0, 25.8, 18.4, 16.3, 16.3, 11.4, 10.6, 10.5, 9.4, 7.2, 7.0, 5.6, 5.3, -5.2; [α]<sub>D</sub><sup>20</sup> -2.6 (*c* 1.01, CHCl<sub>3</sub>); IR (thin film) ν<sub>max</sub> (cm<sup>-1</sup>) 2952, 2931, 2876, 2857, 1732, 1670, 1614, 1513, 1461, 1378, 1247, 1192, 1083, 1040, 1005, 990, 835, 775, 738, 725; HRMS calc. for C<sub>62</sub>H<sub>118</sub>O<sub>9</sub>Si<sub>3</sub>N [M+NH<sub>4</sub>]<sup>+</sup> 1104.8109, found 1104.8091.

### Alcohol 22a

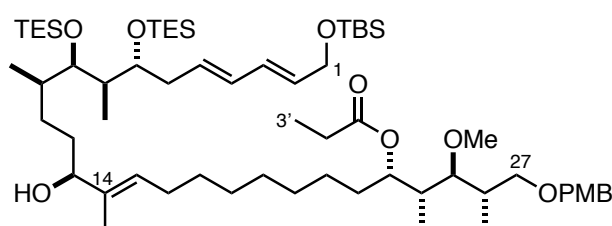

To a solution of enone **22** (1.96 g, 1.80 mmol) in THF (47 mL) was added (*R*)-Me-CBS catalyst (2.16 mL, 1 M in PhMe, 2.16 mmol) at -10 °C and the solution stirred for 5 min before dropwise addition of BH<sub>3</sub>·SMe<sub>2</sub> (188 μL, 1.98 mmol). The solution was stirred at -10 °C for 1.5 h then carefully quenched by the addition of MeOH (50 mL). The solution was warmed to rt and concentrated *in vacuo*. The residue was re-dissolved in MeOH (40 mL) and was again concentrated *in vacuo*. This process was repeated twice further. Purification *via* flash column chromatography (1:6 EtOAc/PE) gave alcohol **22a** (1.79 g, 93%, >20:1 *dr*) as a colourless oil.

**R<sub>f</sub>** 0.72 (1:3 EtOAc/PE); <sup>1</sup>H NMR (500 MHz, CDCl<sub>3</sub>) δ<sub>H</sub> 7.24 (2H, d, *J* = 8.5 Hz, ArH), 6.86 (2H, d, *J* = 8.5 Hz, ArH), 6.18 (1H, dd, *J* = 15.2, 10.4 Hz, H<sub>3</sub>), 6.04 (1H, dd, *J* = 15.3, 10.2 Hz, H<sub>4</sub>), 5.68 (1H, dt, *J* = 14.7, 7.4 Hz, H<sub>5</sub>), 5.64 (1H, dt, *J* = 15.3, 5.6 Hz, H<sub>2</sub>), 5.36 (1H, t, *J* = 6.4 Hz, H<sub>15</sub>), 5.18 (1H, td, *J* = 7.2, 1.8 Hz, H<sub>23</sub>), 4.41 (2H, ABq, *J* = 11.1 Hz, OCH<sub>2</sub>Ar), 4.20 (2H, d, *J* = 5.2 Hz, H<sub>1</sub> × 2), 3.94 (1H, td, *J* = 6.6, 2.5 Hz, H<sub>13</sub>), 3.80 (3H, s, OMe), 3.62-3.58 (1H, m, H<sub>7</sub>), 3.53 (1H, dd, *J* = 9.2, 4.8 Hz, H<sub>27a</sub>), 3.50 (1H, dd, *J* = 5.1, 3.5 Hz, H<sub>9</sub>), 3.38 (3H, s, OMe), 3.32 (1H, dd, *J* = 9.1, 7.4 Hz, H<sub>27b</sub>), 2.87 (1H, dd, *J* = 8.6, 3.4 Hz, H<sub>25</sub>), 2.31 (2H, q, *J* = 7.7 Hz, H<sub>2</sub> × 2), 2.18-2.12 (2H, m, H<sub>6</sub> × 2), 2.12-2.06 (1H, m, H<sub>26</sub>), 2.03-1.94 (2H, m, H<sub>16</sub> × 2), 1.82-1.70 (2H, m, H<sub>8</sub>, H<sub>24</sub>), 1.66-1.60 (2H, m, H<sub>12a</sub>, H<sub>22a</sub>), 1.58 (3H, br s, Me<sub>14</sub>), 1.54-1.48 (1H, m, H<sub>10</sub>), 1.48-1.37 (4H, m, H<sub>11</sub> × 2, H<sub>12b</sub>, H<sub>22b</sub>), 1.35-1.29 (2H, m, H<sub>17</sub> × 2), 1.29-1.24 (8H, m, H<sub>18-21</sub>), 1.14 (3H, t, *J* = 7.6 Hz, H<sub>3</sub> × 3), 1.05 (3H, d, *J* = 7.0 Hz, Me<sub>26</sub>), 0.96 (9H, t, *J* = 8.0 Hz, Si(CH<sub>2</sub>CH<sub>3</sub>)<sub>3</sub>), 0.93 (9H, t, *J* = 7.9 Hz, Si(CH<sub>2</sub>CH<sub>3</sub>)<sub>3</sub>), 0.91 (9H, s, Si(CH<sub>3</sub>)<sub>3</sub>), 0.90-0.84 (9H, m, Me<sub>8</sub>, Me<sub>24</sub>, Me<sub>10</sub>), 0.60 (6H, q, *J* = 8.0 Hz, Si(CH<sub>2</sub>CH<sub>3</sub>)<sub>3</sub>), 0.57 (6H, q, *J* = 7.8 Hz,

Si(CH<sub>2</sub>CH<sub>3</sub>)<sub>3</sub>), 0.07 (6H, s, Si(CH<sub>3</sub>)<sub>2</sub>). <sup>13</sup>C NMR (125 MHz, CDCl<sub>3</sub>) δ<sub>C</sub> 174.1, 159.0, 136.7, 131.6, 131.4, 130.8, 130.3, 130.3, 129.0, 127.5, 113.7, 85.9, 78.7, 77.6, 74.6, 73.1, 72.7, 71.6, 63.7, 61.3, 55.2, 41.7, 38.8, 38.5, 35.9, 35.9, 33.0, 32.7, 29.5, 29.5, 29.4, 29.3, 28.0, 27.8, 27.5, 25.9, 25.7, 18.4, 16.3, 16.2, 10.8, 10.6, 10.3, 9.4, 7.1, 7.0, 5.6, 5.2, -5.2; [α]<sub>D</sub><sup>20</sup> +1.9 (c 1.01, CHCl<sub>3</sub>); IR (thin film) ν<sub>max</sub> (cm<sup>-1</sup>) 2952, 2930, 2876, 2856, 1733, 1614, 1514, 1462, 1378, 1362, 1248, 1193, 1084, 1041, 1005, 990, 835, 776, 737, 725; HRMS calc. for C<sub>62</sub>H<sub>120</sub>O<sub>9</sub>Si<sub>3</sub>N [M+NH<sub>4</sub>]<sup>+</sup> 1106.8265, found 1106.8257.

### Methyl ether **23**

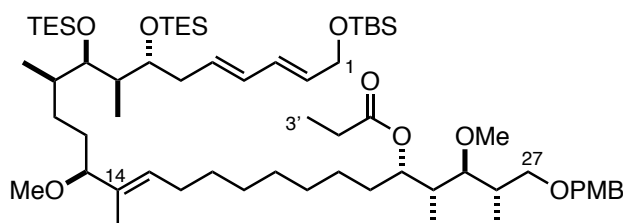

To a solution of Meerwein salt (143 mg, 0.96 mmol) and proton sponge (309 mg, 1.44 mmol) in CH<sub>2</sub>Cl<sub>2</sub> (30 mL) was added alcohol **22a** (525 mg, 0.48 mmol). The reaction was stirred for 4 h at rt before being quenched with NH<sub>4</sub>Cl (50 mL). The layers were separated, and the aqueous phase extracted with CH<sub>2</sub>Cl<sub>2</sub> (3 × 50 mL). The combined organic layers were dried (MgSO<sub>4</sub>), concentrated *in vacuo* and purified by flash column chromatography (1:20 → 1:9 EtOAc/PE) to give methyl ether **23** as a colourless oil (445 mg, 87%).

R<sub>f</sub> 0.79 (1:3 EtOAc/PE); <sup>1</sup>H NMR (400 MHz, CDCl<sub>3</sub>) δ<sub>H</sub> 7.24 (2H, d, *J* = 8.7 Hz, ArH), 6.86 (2H, d, *J* = 8.7 Hz, ArH), 6.18 (1H, dd, *J* = 14.9, 10.6 Hz, H<sub>3</sub>), 6.03 (1H, dd, *J* = 15.3, 10.6 Hz, H<sub>4</sub>), 5.68 (1H, dt, *J* = 14.8, 7.1 Hz, H<sub>5</sub>), 5.64 (1H, dt, *J* = 14.8, 5.9 Hz, H<sub>2</sub>), 5.31 (1H, t, *J* = 7.2 Hz, H<sub>15</sub>), 5.18 (1H, td, *J* = 7.2, 1.7 Hz, H<sub>23</sub>), 4.41 (2H, ABq, *J* = 11.6 Hz, OCH<sub>2</sub>Ar), 4.20 (2H, d, *J* = 5.0 Hz, H<sub>1</sub> × 2), 3.80 (3H, s, OMe), 3.62-3.56 (1H, m, H<sub>7</sub>), 3.53 (1H, dd, *J* = 8.9, 4.5 Hz, H<sub>27a</sub>), 3.48 (1H, dd, *J* = 5.0, 3.2 Hz, H<sub>9</sub>), 3.38 (3H, s, OMe), 3.36-3.30 (2H, m, H<sub>13</sub>, H<sub>27b</sub>), 3.14 (3H, s, OMe), 2.87 (1H, dd, *J* = 8.2, 3.9 Hz, H<sub>25</sub>), 2.31 (2H, q, *J* = 7.6 Hz, H<sub>2</sub> × 2), 2.19-2.12 (2H, m, H<sub>6</sub> × 2), 2.12-1.93 (3H, m, H<sub>16</sub> × 2, H<sub>26</sub>), 1.83-1.68 (2H, m, H<sub>8</sub>, H<sub>24</sub>), 1.68-1.57 (2H, m, H<sub>12a</sub>, H<sub>22a</sub>), 1.54-1.40 (4H, m, H<sub>10</sub>, H<sub>12</sub> × 2, H<sub>22b</sub>), 1.49 (3H, s, Me<sub>14</sub>), 1.39-1.31 (4H, m, H<sub>11</sub> × 2, H<sub>17</sub> × 2), 1.31-1.24 (8H, m, H<sub>18-21</sub>), 1.14 (3H, t, *J* = 7.4 Hz, H<sub>3</sub> × 3), 1.06 (3H, d, *J* = 7.1 Hz, Me<sub>26</sub>), 0.94 (9H, t, *J* = 8.1 Hz, Si(CH<sub>2</sub>CH<sub>3</sub>)<sub>3</sub>), 0.93 (9H, t, *J* = 8.1 Hz, Si(CH<sub>2</sub>CH<sub>3</sub>)<sub>3</sub>), 0.91 (9H, s, Si(CH<sub>3</sub>)<sub>3</sub>), 0.90-0.83 (9H, m, Me<sub>8</sub>, Me<sub>10</sub>, Me<sub>24</sub>), 0.60 (6H, q, *J* = 7.6 Hz, Si(CH<sub>2</sub>CH<sub>3</sub>)<sub>3</sub>), 0.57 (6H, q, *J* = 7.6 Hz, Si(CH<sub>2</sub>CH<sub>3</sub>)<sub>3</sub>), 0.07 (6H, s, Si(CH<sub>3</sub>)<sub>2</sub>). <sup>13</sup>C NMR (125 MHz, CDCl<sub>3</sub>) δ<sub>C</sub> 174.1, 159.0, 133.8, 131.7, 131.3, 130.9, 130.3, 130.3, 129.6, 129.0, 113.7, 88.3, 85.9, 77.6, 74.7, 73.1, 72.8, 71.6, 63.7, 61.4, 55.5, 55.2, 41.7, 38.9, 38.6, 35.9, 35.8, 32.8, 31.8, 29.6, 29.6, 29.5, 29.4, 28.0, 27.9, 27.6, 26.0, 25.8, 18.4, 16.3, 16.1, 10.6, 10.3, 10.1, 9.4, 7.2, 7.0, 5.6, 5.2,

5.2;  $[\alpha]_D^{20} +1.5$  (c 0.89, CHCl<sub>3</sub>); **IR** (thin film)  $\nu_{\max}$  (cm<sup>-1</sup>) 2952, 2926, 2876, 2855, 1734, 1615, 1514, 1462, 1378, 1362, 1248, 1192, 1171, 1093, 1043, 1006, 990, 836, 776, 739, 725; **HRMS** calc. for C<sub>63</sub>H<sub>122</sub>O<sub>9</sub>Si<sub>3</sub>N [M+NH<sub>4</sub>]<sup>+</sup> 1120.8422, found 1120.8420.

### Alcohol **23a**

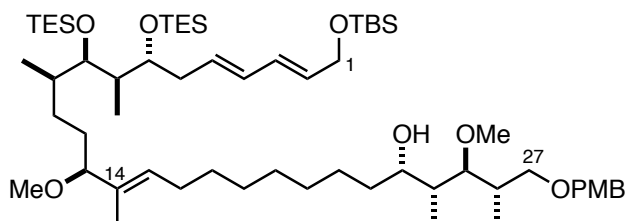

To a solution of ester **23** (1.58 g, 1.43 mmol) in CH<sub>2</sub>Cl<sub>2</sub> (28 mL) was added DIBAL (2.86 mL, 2.86 mmol, 1.0 M in hexanes) at -78 °C. After 1.5 h, the reaction was quenched with NH<sub>4</sub>Cl (25 mL) and Na<sup>+</sup>/K<sup>+</sup> tartrate (25 mL) and allowed to warm to rt. The layers were separated and the aqueous was extracted with CH<sub>2</sub>Cl<sub>2</sub> (3 × 25 mL) and the combined organics were dried (Na<sub>2</sub>SO<sub>4</sub>) and concentrated *in vacuo*. The crude was purified by flash column chromatography (1:4 EtOAc/PE) to afford alcohol **23a** as a colourless oil (1.51 g, 99%).

**R<sub>f</sub>** 0.62 (1:3 EtOAc/PE); **<sup>1</sup>H NMR** (400 MHz, CDCl<sub>3</sub>)  $\delta_{\text{H}}$  7.26 (2H, d,  $J = 8.9$  Hz, ArH), 6.88 (2H, d,  $J = 8.6$  Hz, ArH), 6.18 (1H, dd,  $J = 15.2, 10.7$  Hz, H<sub>3</sub>), 6.04 (1H, dd,  $J = 15.2, 10.7$  Hz, H<sub>4</sub>), 5.68 (1H, dt,  $J = 14.4, 7.0$  Hz, H<sub>5</sub>), 5.64 (1H, dt,  $J = 15.2, 5.0$  Hz, H<sub>2</sub>), 5.31 (1H, t,  $J = 7.0$  Hz, H<sub>15</sub>), 4.44 (2H, s, OCH<sub>2</sub>Ar), 4.20 (2H, d,  $J = 5.4$  Hz, H<sub>1</sub> × 2), 3.89 (1H, t,  $J = 6.6$  Hz, H<sub>23</sub>), 3.80 (3H, s, OMe), 3.62-3.56 (1H, m, H<sub>7</sub>), 3.54-3.50 (1H, m, H<sub>27a</sub>), 3.50-3.46 (3H, m, H<sub>9</sub>, H<sub>27b</sub>, OH), 3.44 (3H, s, OMe), 3.34 (1H, t,  $J = 7.1$  Hz, H<sub>13</sub>), 3.19 (1H, dd,  $J = 9.0, 3.0$  Hz, H<sub>25</sub>), 3.14 (3H, s, OMe), 2.19-2.10 (2H, m, H<sub>6</sub> × 2), 2.10-1.97 (3H, m, H<sub>26</sub>, H<sub>16</sub> × 2), 1.76-1.70 (2H, m, H<sub>8</sub>, H<sub>24</sub>), 1.55-1.44 (4H, m, H<sub>10</sub>, H<sub>12</sub> × 2, H<sub>22a</sub>), 1.49 (3H, s, Me<sub>14</sub>), 1.41-1.31 (5H, m, H<sub>11</sub> × 2, H<sub>17</sub> × 2, H<sub>22b</sub>), 1.31-1.26 (8H, m, H<sub>18-21</sub>), 1.04 (3H, d,  $J = 6.9$  Hz, Me<sub>24</sub>), 0.95 (9H, t,  $J = 8.1$  Hz, Si(CH<sub>2</sub>CH<sub>3</sub>)<sub>3</sub>), 0.94 (9H, t,  $J = 8.1$  Hz, Si(CH<sub>2</sub>CH<sub>3</sub>)<sub>3</sub>), 0.94-0.91 (3H, obs m, Me<sub>26</sub>), 0.91 (9H, s, Si(CH<sub>3</sub>)<sub>3</sub>), 0.87 (3H, d,  $J = 7.5$  Hz, Me<sub>10</sub>), 0.85 (3H, d,  $J = 7.6$  Hz, Me<sub>8</sub>), 0.60 (6H, q,  $J = 8.0$  Hz, Si(CH<sub>2</sub>CH<sub>3</sub>)<sub>3</sub>), 0.57 (6H, q,  $J = 8.1$  Hz, Si(CH<sub>2</sub>CH<sub>3</sub>)<sub>3</sub>), 0.07 (6H, s, Si(CH<sub>3</sub>)<sub>2</sub>). **<sup>13</sup>C NMR** (125 MHz, CDCl<sub>3</sub>)  $\delta_{\text{C}}$  159.1, 133.7, 131.7, 131.3, 130.6, 130.3, 130.2, 129.6, 129.1, 113.7, 89.0, 88.2, 77.6, 74.7, 72.7, 72.0, 70.6, 63.7, 61.7, 55.5, 55.2, 41.6, 38.6, 37.1, 36.7, 35.8, 34.7, 31.7, 29.8, 29.6, 29.5, 29.4, 27.9, 28.5, 26.2, 25.9, 18.4, 16.0, 14.9, 11.4, 10.2, 10.0, 7.1, 7.0, 5.6, 5.2, 5.2;  $[\alpha]_D^{20} 1.8$  (c 1.01, CHCl<sub>3</sub>); **IR** (thin film)  $\nu_{\max}$  (cm<sup>-1</sup>) 3507, 2952, 2928, 2876, 2853, 1613, 1514, 1460, 1413, 1377, 1359, 1300, 1246, 1169, 1084, 1042, 1006, 990, 965, 834, 776, 739, 725, 675; **HRMS** calc. for C<sub>60</sub>H<sub>118</sub>O<sub>8</sub>Si<sub>3</sub>N [M+NH<sub>4</sub>]<sup>+</sup> 1064.8160, found 1064.8128.

## Aldehyde **23b**

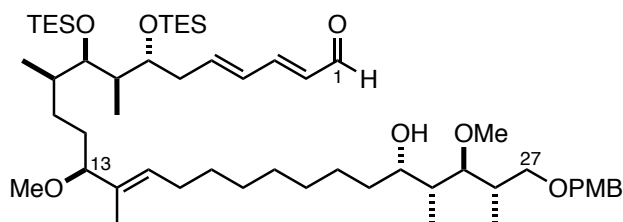

To a solution of TBS ether **23a** (836 mg, 0.80 mmol) in CH<sub>2</sub>Cl<sub>2</sub> (12 mL) and pH 9.2 buffer (3 mL) at 0 °C was added DDQ (200 mg, 0.88 mmol). The solution was stirred at this temperature for 15 min, then quenched with NaHCO<sub>3</sub> (60 mL) and warmed to rt. The mixture was extracted with CH<sub>2</sub>Cl<sub>2</sub> (3 × 50 mL) and the combined organics were dried (Na<sub>2</sub>SO<sub>4</sub>) and concentrated *in vacuo*. Purification *via* flash column chromatography (1:6 EtOAc/PE) gave aldehyde **23b** (560 mg, 75%, 91% brsm) as a colourless oil.

**R<sub>f</sub>** 0.62 (1:3 EtOAc/PE); **<sup>1</sup>H NMR** (500 MHz, CDCl<sub>3</sub>)  $\delta_{\text{H}}$  9.55 (1H, d,  $J = 7.9$  Hz, H<sub>1</sub>), 7.25 (2H, d,  $J = 7.8$  Hz, ArH), 7.08 (1H, dd,  $J = 15.3, 10.1$  Hz, H<sub>3</sub>), 6.88 (2H, d,  $J = 8.5$  Hz, ArH), 6.34-6.28 (2H, m, H<sub>4</sub>, H<sub>5</sub>), 6.08 (1H, dd,  $J = 15.4, 8.2$  Hz, H<sub>2</sub>), 5.31 (1H, t,  $J = 7.0$  Hz, H<sub>15</sub>), 4.43 (2H, s, OCH<sub>2</sub>Ar), 3.90 (1H, app t,  $J = 6.6$  Hz, H<sub>23</sub>), 3.81 (3H, s, OMe), 3.70-3.63 (1H, m, H<sub>7</sub>), 3.55-3.45 (4H, m, H<sub>9</sub>, H<sub>27</sub> × 2, OH), 3.44 (3H, s, OMe), 3.34 (1H, t,  $J = 6.1$  Hz, H<sub>13</sub>), 3.18 (1H, dd,  $J = 9.3, 3.7$  Hz, H<sub>25</sub>), 3.14 (3H, s, OMe), 2.37-2.24 (2H, m, H<sub>6</sub> × 2), 2.11-1.93 (3H, m, H<sub>16</sub> × 2, H<sub>26</sub>), 1.80-1.71 (1H, m, H<sub>8</sub>), 1.71-1.64 (1H, m, H<sub>24</sub>), 1.57-1.51 (4H, m, H<sub>10</sub>, H<sub>22a</sub>, H<sub>12</sub> × 2), 1.49 (3H, s, Me<sub>14</sub>), 1.45-1.33 (5H, m, H<sub>17</sub> × 2, H<sub>11</sub> × 2, H<sub>22b</sub>), 1.33-1.25 (8H, m, H<sub>18-21</sub>), 1.04 (3H, d,  $J = 7.1$  Hz, Me<sub>24</sub>), 0.95 (9H, t,  $J = 7.9$  Hz, Si(CH<sub>2</sub>CH<sub>3</sub>)<sub>3</sub>), 0.94 (9H, t,  $J = 7.9$  Hz, Si(CH<sub>2</sub>CH<sub>3</sub>)<sub>3</sub>), 0.93 (3H, obs d,  $J = 7.8$  Hz, Me<sub>26</sub>), 0.88 (3H, d,  $J = 6.8$  Hz, Me<sub>10</sub>), 0.87 (3H, d,  $J = 6.8$  Hz, Me<sub>8</sub>), 0.60 (6H, q,  $J = 7.8$  Hz, Si(CH<sub>2</sub>CH<sub>3</sub>)<sub>3</sub>), 0.57 (6H, q,  $J = 7.8$  Hz, Si(CH<sub>2</sub>CH<sub>3</sub>)<sub>3</sub>); **<sup>13</sup>C NMR** (125 MHz, CDCl<sub>3</sub>)  $\delta_{\text{C}}$  193.9, 159.1, 152.5, 144.8, 133.7, 130.6, 130.3, 130.2, 129.6, 129.2, 113.7, 89.0, 88.2, 77.4, 74.3, 72.7, 72.0, 70.6, 61.7, 55.5, 55.2, 41.5, 38.9, 37.1, 36.7, 36.4, 34.7, 31.8, 29.8, 29.6, 29.5, 29.4, 28.3, 27.5, 26.2, 15.9, 14.9, 11.4, 10.1, 10.0, 7.1, 6.9, 5.6, 5.1;  $[\alpha]_{\text{D}}^{20}$  2.4 (c 1.01, CHCl<sub>3</sub>); **IR** (thin film)  $\nu_{\text{max}}$  (cm<sup>-1</sup>) 3486, 2952, 2931, 2876, 2853, 1685, 1640, 1613, 1514, 1459, 1416, 1378, 1367, 1302, 1247, 1171, 1159, 1087, 1038, 1009, 988, 820, 739, 725; **HRMS** calc. for C<sub>54</sub>H<sub>102</sub>NO<sub>8</sub>Si<sub>2</sub> [M+NH<sub>4</sub>]<sup>+</sup> 948.7138, found 948.7133.

## Seco acid 24

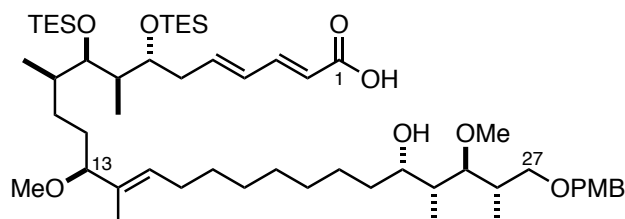

To aldehyde **23b** (510 mg, 0.55 mmol) was added 2-methyl-2-butene (8.71 mL, 82.6 mmol) and the solution was cooled to 0 °C. NaClO<sub>2</sub> (1.86 g, 80% technical grade, 16.4 mmol) and NaH<sub>2</sub>PO<sub>4</sub>·H<sub>2</sub>O (3.43 g, 22 mmol) were dissolved in H<sub>2</sub>O/*t*-BuOH (34 mL, 1:1) and added to the reaction mixture. The reaction was warmed to rt and stirred for 16 h before being diluted with EtOAc (50 mL) and brine (50 mL). The mixture was extracted with EtOAc (3 × 10 mL) and the combined organics were dried (Na<sub>2</sub>SO<sub>4</sub>) and concentrated *in vacuo* to give *seco*-acid **24** (*ca.* 521 mg) as a pale-yellow oil. The crude material was used directly in the next reaction without further purification.

**R<sub>f</sub>** 0.21 (1:4:1 EtOAc/PE/AcOH); **<sup>1</sup>H NMR** (500 MHz, CDCl<sub>3</sub>)  $\delta_{\text{H}}$  7.32 (1H, dd,  $J = 15.2, 9.9$  Hz, H<sub>3</sub>), 7.25 (2H, d,  $J = 8.5$  Hz, ArH), 6.88 (2H, d,  $J = 8.5$  Hz, ArH), 6.27-6.12 (2H, m, H<sub>4</sub>, H<sub>5</sub>), 5.79 (1H, d,  $J = 15.5$  Hz, H<sub>2</sub>), 5.31 (1H, t,  $J = 7.0$  Hz, H<sub>15</sub>), 4.44 (2H, s, OCH<sub>2</sub>Ar), 3.98-3.91 (1H, t,  $J = 7.1$  Hz, H<sub>23</sub>), 3.81 (3H, s, OMe), 3.67-3.60 (1H, m, H<sub>7</sub>), 3.55-3.40 (2H, m, H<sub>9</sub>, H<sub>27b</sub>), 3.49-3.45 (1H, m, H<sub>27b</sub>), 3.45 (3H, s, OMe), 3.35 (1H, t,  $J = 6.9$  Hz, H<sub>13</sub>), 3.19 (1H, dd,  $J = 8.8, 3.1$  Hz, H<sub>25</sub>), 3.14 (3H, s, OMe), 2.31-2.22 (2H, m, H<sub>6</sub> × 2), 2.12-2.06 (2H, m, H<sub>16a</sub>, H<sub>26</sub>), 2.01-1.93 (1H, m, H<sub>16b</sub>), 1.76-1.70 (2H, m, H<sub>8</sub>, H<sub>24</sub>), 1.65-1.54 (4H, m, H<sub>10</sub>, H<sub>12</sub> × 2, H<sub>22a</sub>), 1.50 (3H, s, Me<sub>14</sub>), 1.40-1.20 (13H, m, H<sub>11</sub> × 2, H<sub>17-21</sub>, H<sub>22b</sub>), 1.04 (3H, d,  $J = 7.3$  Hz, Me<sub>24</sub>), 0.95 (9H, t,  $J = 7.9$  Hz, Si(CH<sub>2</sub>CH<sub>3</sub>)<sub>3</sub>), 0.94 (9H, t,  $J = 7.9$  Hz, Si(CH<sub>2</sub>CH<sub>3</sub>)<sub>3</sub>), 0.94 (3H, obs d,  $J = 8.0$  Hz, Me<sub>26</sub>), 0.88 (3H, d,  $J = 6.8$  Hz, Me<sub>10</sub>), 0.84 (3H, d,  $J = 7.1$  Hz, Me<sub>8</sub>), 0.59 (6H, q,  $J = 7.1$  Hz, Si(CH<sub>2</sub>CH<sub>3</sub>)<sub>3</sub>), 0.57 (6H, q,  $J = 7.8$  Hz, Si(CH<sub>2</sub>CH<sub>3</sub>)<sub>3</sub>); **<sup>13</sup>C NMR** (125 MHz, CDCl<sub>3</sub>)  $\delta_{\text{C}}$  170.9, 159.1, 146.5, 142.7, 133.6, 130.6, 130.0, 129.8, 129.2, 118.9, 113.7, 89.1, 88.1, 77.2, 74.2, 72.8, 72.0, 70.8, 61.7, 55.5, 55.3, 41.3, 39.1, 37.1, 36.6, 36.3, 34.6, 31.7, 29.7, 29.7, 29.4, 29.3, 28.3, 27.6, 26.1, 15.6, 14.9, 11.5, 10.2, 10.0, 7.1, 7.0, 5.6, 5.2;  **$[\alpha]_{\text{D}}^{20}$**  6.0 (c 0.99, CHCl<sub>3</sub>); IR (thin film)  $\nu_{\text{max}}$  (cm<sup>-1</sup>) 2948, 2931, 2876, 2853, 1712, 1690, 1643, 1614, 1513, 1459, 1415, 1377, 1302, 1246, 1173, 1084, 1038, 1009, 820, 739, 727; **HRMS** calc. for C<sub>54</sub>H<sub>102</sub>NO<sub>9</sub>Si<sub>2</sub> [M+NH<sub>4</sub>]<sup>+</sup> 964.7081, found 964.7088.



## Macrocycle 25

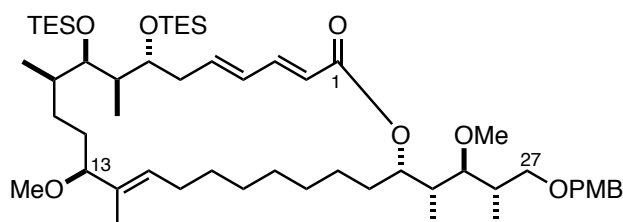

Crude *seco*-acid **24** (ca. 568 mg, 0.60 mmol) was dissolved in THF (15 mL) and NEt<sub>3</sub> (836 μL, 6.00 mmol) and TCBC (656 μL, 4.20 mmol) were added. The mixture was stirred at rt for 1 h, then diluted with PhMe (100 mL) and the resulting cloudy orange solution added to a solution of DMAP (733 mg, 6.00 mmol) in PhMe (50 mL) *via* syringe pump at a rate of 4.6 mL/h. Once complete the reaction was stirred for a further 16 h before being quenched with NH<sub>4</sub>Cl (100 mL). The layers were separated, and the aqueous phase was extracted with EtOAc (3 × 100 mL) and the combined organics were dried (Na<sub>2</sub>SO<sub>4</sub>) and concentrated *in vacuo*. Flash column chromatography (1:50 → 1:9 EtOAc/PE) yielded macrocycle **25** (386 mg, 70% over two steps) as a colourless oil.

**R<sub>f</sub>** 0.52 (1:5 EtOAc/PE); **<sup>1</sup>H NMR** (500 MHz, CDCl<sub>3</sub>)  $\delta$ <sub>H</sub> 7.28 (1H, dd, *J* = 15.3, 10.0 Hz, H<sub>3</sub>), 7.24 (2H, d, *J* = 8.9 Hz, ArH), 6.86 (2H, d, *J* = 8.5 Hz, ArH), 6.25-6.15 (2H, m, H<sub>4</sub>, H<sub>5</sub>), 5.83 (1H, d, *J* = 15.7 Hz, H<sub>2</sub>), 5.38 (1H, dt, *J* = 10.8, 2.3 Hz, H<sub>23</sub>), 5.24 (1H, dd, *J* = 8.0, 6.0 Hz, H<sub>15</sub>), 4.41 (2H, ABq, *J* = 11.4 Hz, OCH<sub>2</sub>Ar), 3.80 (3H, s, OMe), 3.67-3.61 (1H, m, H<sub>7</sub>), 3.56-3.50 (2H, m, H<sub>9</sub>, H<sub>27a</sub>), 3.45 (3H, s, OMe), 3.32 (1H, dd, *J* = 9.2, 7.2 Hz, H<sub>27b</sub>), 3.31 (1H, t, *J* = 8.7 Hz, H<sub>13</sub>), 3.13 (3H, s, OMe), 2.90 (1H, dd, *J* = 8.3, 3.8 Hz, H<sub>25</sub>), 2.35-2.26 (1H, m, H<sub>6a</sub>), 2.18-2.03 (3H, m, H<sub>6b</sub>, H<sub>16a</sub>, H<sub>26</sub>), 1.88-1.80 (1H, m, H<sub>16b</sub>), 1.78-1.73 (1H, m, H<sub>24</sub>), 1.73-1.64 (2H, m, H<sub>8</sub>, H<sub>22a</sub>), 1.62-1.57 (2H, m, H<sub>10</sub>, H<sub>12a</sub>), 1.53-1.48 (1H, m, H<sub>12b</sub>), 1.48 (3H, s, Me<sub>14</sub>), 1.43-1.33 (3H, m, H<sub>11a</sub>, H<sub>21a</sub>, H<sub>22b</sub>), 1.33-1.20 (10H, m, H<sub>11b</sub>, H<sub>17-20</sub>, H<sub>21b</sub>), 1.06 (3H, d, *J* = 7.1 Hz, Me<sub>26</sub>), 0.96 (9H, t, *J* = 8.2 Hz, Si(CH<sub>2</sub>CH<sub>3</sub>)<sub>3</sub>), 0.95 (9H, t, *J* = 8.2 Hz, Si(CH<sub>2</sub>CH<sub>3</sub>)<sub>3</sub>), 0.94 (9H, m, Me<sub>8</sub>, Me<sub>10</sub>, Me<sub>24</sub>), 0.61 (6H, q, *J* = 7.8 Hz, Si(CH<sub>2</sub>CH<sub>3</sub>)<sub>3</sub>), 0.58 (6H, q, *J* = 7.8 Hz, Si(CH<sub>2</sub>CH<sub>3</sub>)<sub>3</sub>); **<sup>13</sup>C NMR** (125 MHz, CDCl<sub>3</sub>)  $\delta$ <sub>C</sub> 167.1, 158.9, 144.8, 141.8, 133.2, 130.8, 130.0, 129.9, 119.7, 113.6, 88.0, 85.6, 73.1, 72.6, 71.5, 61.0, 55.5, 55.1, 40.9, 40.7, 36.4, 35.9, 33.8, 31.3, 28.9, 28.5, 28.4, 28.2, 27.8, 27.7, 27.6, 24.5, 23.8, 20.7, 17.4, 17.2, 16.1, 14.6, 11.7, 11.1, 9.7, 7.0, 6.9, 5.3, 5.1; [ $\alpha$ ]<sub>D</sub><sup>20</sup> +10.9 (*c* 1.00, CHCl<sub>3</sub>); **IR** (thin film)  $\nu$ <sub>max</sub> (cm<sup>-1</sup>) 2930, 2876, 1711, 1643, 1614, 1580, 1513, 1458, 1367, 1300, 1245, 1171, 1134, 1091, 1038, 1001; **HRMS** calc. for C<sub>54</sub>H<sub>96</sub>O<sub>8</sub>Si<sub>2</sub>Na [M+Na]<sup>+</sup> 951.6536, found 951.6541.

### 3.4. Completion of synthesis of the aplyologues

#### Alcohol **25a**

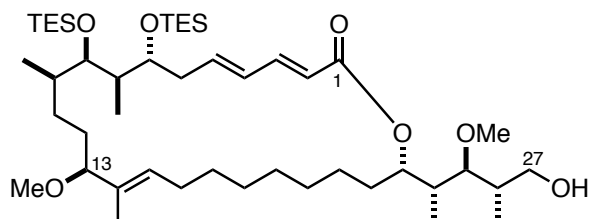

To a solution of PMB ether **25** (335 mg, 0.36 mmol) in CH<sub>2</sub>Cl<sub>2</sub> (20 mL) and pH 7.0 buffer (10 mL) was added DDQ (164 mg, 0.72 mmol). The reaction was stirred for 2 h before being quenched with NaHCO<sub>3</sub> (50 mL). The solution was diluted with H<sub>2</sub>O (100 mL) and the layers were separated. The aqueous phase was extracted with CH<sub>2</sub>Cl<sub>2</sub> (3 × 100 mL) and the combined organics dried (Na<sub>2</sub>SO<sub>4</sub>) and concentrated *in vacuo*. The crude residue was purified by flash column chromatography (1:50 EtOAc/PhMe → 1:2 EtOAc/PE) to give alcohol **25a** (238 mg, 82%) as a colourless oil.

**R<sub>f</sub>** 0.21 (1:5 EtOAc/PE); **<sup>1</sup>H NMR** (500 MHz, CDCl<sub>3</sub>)  $\delta_{\text{H}}$  7.28 (1H, dd,  $J = 15.1, 10.3$  Hz, H<sub>3</sub>), 6.23-6.18 (2H, m, H<sub>4</sub>, H<sub>5</sub>), 5.84 (1H, d,  $J = 14.8$  Hz, H<sub>2</sub>), 5.38 (1H, dt,  $J = 10.9, 2.6$  Hz, H<sub>23</sub>), 5.25 (1H, dd,  $J = 8.4, 5.7$  Hz, H<sub>15</sub>), 3.80 (1H, dd,  $J = 10.9, 3.5$  Hz, H<sub>27a</sub>), 3.68-3.62 (1H, m, H<sub>7</sub>), 3.59-3.55 (2H, m, H<sub>9</sub>, H<sub>27b</sub>), 3.53 (3H, s, OMe), 3.31 (1H, dd,  $J = 8.4, 5.8$  Hz, H<sub>13</sub>), 3.14 (3H, s, OMe), 3.00 (1H, dd,  $J = 8.1, 3.5$  Hz, H<sub>25</sub>), 2.87 (1H, br s, OH), 2.35-2.27 (1H, m, H<sub>6a</sub>), 2.23-2.06 (2H, m, H<sub>6b</sub>, H<sub>16a</sub>), 1.94-1.80 (3H, m, H<sub>16b</sub>, H<sub>24</sub>, H<sub>26</sub>), 1.77-1.64 (2H, m, H<sub>8</sub>, H<sub>22a</sub>), 1.64-1.49 (4H, m, H<sub>10</sub>, H<sub>12</sub> × 2, H<sub>22b</sub>), 1.47 (3H, s, Me<sub>14</sub>), 1.45-1.36 (2H, m, H<sub>11a</sub>, H<sub>21a</sub>), 1.35-1.18 (10H, m, H<sub>11b</sub>, H<sub>17-20</sub>, H<sub>21b</sub>), 1.13 (3H, d,  $J = 7.2$  Hz, Me<sub>26</sub>), 0.96 (9H, t,  $J = 7.9$  Hz, Si(CH<sub>2</sub>CH<sub>3</sub>)<sub>3</sub>), 0.95 (9H, t,  $J = 7.9$  Hz, Si(CH<sub>2</sub>CH<sub>3</sub>)<sub>3</sub>), 0.93 (3H, obs d, Me<sub>24</sub>), 0.91 (3H, d,  $J = 7.6$  Hz, Me<sub>10</sub>), 0.89 (3H, d,  $J = 7.0$  Hz, Me<sub>8</sub>), 0.60 (6H, q,  $J = 7.8$  Hz, Si(CH<sub>2</sub>CH<sub>3</sub>)<sub>3</sub>), 0.58 (6H, q,  $J = 7.8$  Hz, Si(CH<sub>2</sub>CH<sub>3</sub>)<sub>3</sub>); **<sup>13</sup>C NMR** (125 MHz, CDCl<sub>3</sub>)  $\delta_{\text{C}}$  167.3, 145.1, 141.8, 133.3, 130.1, 129.9, 129.1, 128.7, 119.6, 88.7, 88.1, 77.2, 73.4, 73.1, 65.1, 61.5, 41.7, 41.1, 39.6, 36.2, 36.2, 33.6, 31.4, 29.0, 28.6, 28.3, 27.9, 27.8, 27.7, 24.5, 16.2, 14.5, 11.7, 11.2, 9.8, 7.1, 7.0, 5.4, 5.2; **[ $\alpha$ ]<sub>D</sub><sup>20</sup>** +19.2 (*c* 1.00, CHCl<sub>3</sub>); **IR** (thin film)  $\nu_{\text{max}}$  (cm<sup>-1</sup>) 3452, 2935, 2876, 1712, 1642, 1458, 1415, 1367, 1300, 1238, 1134, 1092, 842, 739; **HRMS** calc. for C<sub>46</sub>H<sub>88</sub>O<sub>7</sub>Si<sub>2</sub>Na [M+Na]<sup>+</sup> 831.5961, found 831.5957.

## Aldehyde 26

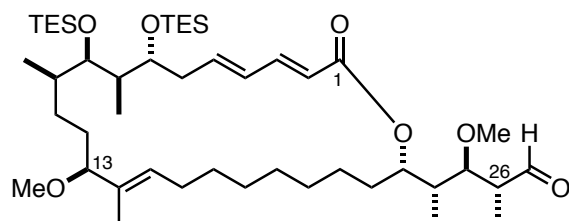

To a solution of alcohol **25a** (144 mg, 0.18 mmol) in  $\text{CH}_2\text{Cl}_2$  (17 ml) was added DMP (377 mg, 0.89 mmol) and  $\text{NaHCO}_3$  (74 mg, 0.89 mmol). The mixture was stirred for 2 h before being quenched with  $\text{Na}_2\text{S}_2\text{O}_3$  (50 mL). The quenching mixture was stirred for 1 h and the layers were separated. The aqueous phase was extracted with  $\text{CH}_2\text{Cl}_2$  ( $3 \times 50$  mL) and the combined organics were dried ( $\text{Na}_2\text{SO}_4$ ) and concentrated *in vacuo*. Aldehyde **26** was used immediately and crude subsequent aldol reaction.

**R<sub>f</sub>** 0.68 (1:1 EtOAc/PE); **<sup>1</sup>H NMR** (500 MHz,  $\text{CDCl}_3$ )  $\delta_{\text{H}}$  9.74 (1H, d,  $J = 1.4$  Hz, CHO), 7.29 (1H, dd,  $J = 15.0, 10.0$  Hz, H<sub>3</sub>), 6.27-6.15 (2H, m, H<sub>4</sub>, H<sub>5</sub>), 5.84 (1H, d,  $J = 14.4$  Hz, H<sub>2</sub>), 5.45 (1H, dt,  $J = 10.8, 2.2$  Hz, H<sub>23</sub>), 5.25 (1H, dd,  $J = 8.4, 5.7$  Hz, H<sub>15</sub>), 3.68-3.61 (1H, m, H<sub>7</sub>), 3.56-3.49 (1H, m, H<sub>9</sub>), 3.44 (3H, s, OMe), 3.34-3.26 (2H, m, H<sub>13</sub>, H<sub>25</sub>), 3.13 (3H, s, OMe), 2.74-2.64 (1H, m, H<sub>26</sub>), 2.37-2.25 (1H, m, H<sub>6a</sub>), 2.25-2.04 (2H, m, H<sub>6b</sub>, H<sub>16a</sub>), 1.90-1.78 (2H, m, H<sub>16b</sub>, H<sub>24</sub>), 1.78-1.65 (2H, m, H<sub>8</sub>, H<sub>22a</sub>), 1.65-1.49 (3H, m, H<sub>10</sub>, H<sub>12</sub>  $\times$  2), 1.47 (3H, s, Me<sub>14</sub>), 1.45-1.35 (3H, m, H<sub>11a</sub>, H<sub>21a</sub>, H<sub>22b</sub>), 1.35-1.19 (10H, m, H<sub>11b</sub>, H<sub>17-20</sub>, H<sub>21b</sub>), 1.16 (3H, d,  $J = 7.0$  Hz, Me<sub>26</sub>), 0.96 (18H, t,  $J = 7.6$  Hz,  $\text{Si}(\text{CH}_2\text{CH}_3)_3 \times 2$ ), 0.93 (3H, d,  $J = 7.2$  Hz, Me<sub>10</sub>), 0.89 (3H, d,  $J = 7.0$  Hz, Me<sub>8</sub>), 0.83 (3H, d,  $J = 7.0$  Hz, Me<sub>24</sub>), 0.61 (6H, q,  $J = 7.9$  Hz,  $\text{Si}(\text{CH}_2\text{CH}_3)_3$ ), 0.57 (6H, q,  $J = 7.9$  Hz,  $\text{Si}(\text{CH}_2\text{CH}_3)_3$ ). **<sup>13</sup>C NMR** (125 MHz,  $\text{CDCl}_3$ )  $\delta_{\text{C}}$  203.9, 167.2, 145.2, 141.9, 133.3, 130.1, 129.9, 119.4, 88.0, 83.4, 77.2, 73.4, 72.6, 59.2, 55.4, 48.1, 40.8, 39.5, 36.4, 33.2, 31.4, 29.7, 29.0, 28.6, 28.3, 27.8, 27.8, 27.6, 24.6, 14.5, 11.6, 10.4, 9.9, 9.8, 7.0, 7.0, 5.4, 5.2;  **$[\alpha]_{\text{D}}^{20}$**  1.9 (c 1.00,  $\text{CHCl}_3$ ); **IR** (thin film)  $\nu_{\text{max}}$  ( $\text{cm}^{-1}$ ) 2948, 2932, 2876, 1714, 1641, 1615, 1458, 1413, 1361, 1300, 1260, 1236, 1171, 1133, 1096, 1058, 1002, 739, 725; **HRMS** calc. for  $\text{C}_{46}\text{H}_{90}\text{O}_7\text{Si}_2\text{N}$   $[\text{M}+\text{NH}_4]^+$  824.6250, found 824.6250.

## Enone 26a

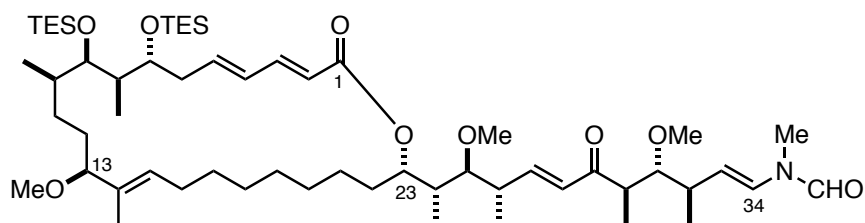

Ketone *E*-**11** was azeotropically dried with benzene and placed under vacuum for 16 h. To a solution of ketone *E*-**11** (125 mg, 0.55 mmol) in Et<sub>2</sub>O (5 mL) at 0 °C was added a freshly prepared solution of BCy<sub>2</sub>Cl·NEt<sub>3</sub> (275 μL, 0.55 mmol, 2.0 M in Et<sub>2</sub>O). The resulting cloudy yellow solution of enolate was stirred at 0 °C for 1 h before being cooled to –78 °C. A solution of crude aldehyde **26** (ca. 140 mg) in Et<sub>2</sub>O (3 mL) was added and the reaction mixture was stirred at –78 °C for 2 h, then warmed to –10 °C over 1 h before being quenched with SiO<sub>2</sub> (ca. 1 g). The slurry was stirred for 1 h then filtered and rinsed with Et<sub>2</sub>O (10 mL) before being concentrated *in vacuo*. The crude material was purified by flash column chromatography (3:1→1:1 EtOAc/PE). As the aldol adduct and ketone *E*-**11** were inseparable by chromatography, all fractions containing the intermediary aldol adduct and ketone *E*-**11** were combined and used subsequently in the elimination reaction.

To a solution of the crude aldol adduct and ketone *E*-**11** (ca. 184 mg) in THF (6 mL) was added Burgess reagent (83 mg, 0.36 mmol). The reaction mixture was stirred at room temperature for 16 h then quenched with NH<sub>4</sub>Cl (10 mL) and extracted with EtOAc (3 × 10 mL). The combined organic layers were washed with brine (15 mL), dried (MgSO<sub>4</sub>) and concentrated *in vacuo*. The crude product was purified by flash column chromatography (2:1→1:1 EtOAc/PE) yielding enone **26a** (117 mg, 65% over three steps) and recovered ketone *E*-**11** (75 mg).

R<sub>f</sub> 0.89 (1:1 EtOAc/PE); <sup>1</sup>H NMR (500 MHz, CDCl<sub>3</sub>) δ<sub>H</sub> 8.30 (0.60H, s, NCHO), [8.08] (0.30H, s, NCHO\*), 7.30 (1H, dd, *J* = 15.4, 9.1 Hz, H<sub>3</sub>), [7.15] (0.33H, d, *J* = 14.6 Hz, H<sub>34</sub>\*), 6.91 (1H, dd, *J* = 15.1, 8.1 Hz, H<sub>27</sub>), 6.48 (0.67H, d, *J* = 14.3 Hz, H<sub>34</sub>), 6.25-6.10 (3H, m, H<sub>4</sub>, H<sub>5</sub>, H<sub>28</sub>), 5.83 (1H, d, *J* = 15.2 Hz, H<sub>2</sub>), 5.40 (1H, br d, *J* = 10.7 Hz, H<sub>23</sub>), 5.24 (1H, t, *J* = 6.0 Hz, H<sub>15</sub>), 5.15 (1H, dd, *J* = 13.5, 9.9 Hz, H<sub>33</sub>), 3.68-3.61 (1H, m, H<sub>7</sub>), 3.56-3.51 (1H, m, H<sub>9</sub>), 3.49 (3H, s, OMe), 3.33-3.27 (5H, m, H<sub>13</sub>, H<sub>31</sub>, OMe), 3.13 (3H, s, OMe), [3.10] (1H, s, NMe\*), 3.06 (2H, s, NMe), 3.03-2.95 (1H, m, H<sub>30</sub>), 2.95-2.89 (1H, m, H<sub>25</sub>), 2.66-2.57 (1H, m, H<sub>26</sub>), 2.50-2.37 (1H, m, H<sub>32</sub>), 2.36-2.24 (1H, m, H<sub>6a</sub>), 2.22-2.07 (2H, m, H<sub>6b</sub>, H<sub>16a</sub>), 1.89-1.79 (1H, m, H<sub>16b</sub>), 1.74-1.65 (2H, m, H<sub>8</sub>, H<sub>22a</sub>), 1.64-1.57 (3H, m, H<sub>10</sub>, H<sub>12a</sub>, H<sub>24</sub>), 1.47 (3H, s, Me<sub>14</sub>), 1.44-1.33 (2H, m, H<sub>11a</sub>, H<sub>22b</sub>), 1.32-1.19 (11H, m, H<sub>11b</sub>, H<sub>17-21</sub>), 1.18-1.12 (6H, m, Me<sub>26</sub>, Me<sub>32</sub>), 0.96 (18H, t, *J* = 7.7 Hz, Si(CH<sub>2</sub>CH<sub>3</sub>)<sub>3</sub> × 2), 0.95 (3H, d, Me<sub>30</sub>), 0.92 (3H, d, *J* = 7.1 Hz, Me<sub>10</sub>),

0.89 (3H, d,  $J = 7.1$  Hz, Me<sub>8</sub>), 0.83 (3H, d,  $J = 7.4$  Hz, Me<sub>24</sub>), 0.60 (6H, q,  $J = 7.4$  Hz, Si(CH<sub>2</sub>CH<sub>3</sub>)<sub>3</sub>), 0.58 (6H, q,  $J = 7.4$  Hz, Si(CH<sub>2</sub>CH<sub>3</sub>)<sub>3</sub>); <sup>13</sup>C NMR (125 MHz, CDCl<sub>3</sub>) δ<sub>C</sub> [203.5], 203.4, [167.2], 162.2, [160.9], 149.3, [149.2], 145.1, 141.9, 133.2, [130.5], 130.1, 129.9, 128.8, [124.7], 119.5, [113.3], 111.4, 88.0, [87.6], 87.5, 86.0, 77.1, 73.4, 72.9, 61.2, 61.1, 55.4, [46.1], 46.0, 41.4, 39.6, 39.5, [37.9], 37.7, 36.5, 33.5, [33.0], 31.4, 29.0, 28.6, 28.3, 27.9, 27.8, 27.7, 27.5, 24.6, 19.5, 17.4, 14.5, 13.8, [13.7], 11.7, 10.4, [10.3], 9.8, 7.1, 7.0, 5.4, 5.2; [α]<sub>D</sub><sup>20</sup> -39.7 (c 1.00, CHCl<sub>3</sub>); IR (thin film) ν<sub>max</sub> (cm<sup>-1</sup>) 2924, 2875, 1696, 1656, 1458, 1370, 1237, 1134, 1095, 1069, 1003, 913; HRMS calc. for C<sub>58</sub>H<sub>105</sub>NO<sub>9</sub>Si<sub>2</sub>Na [M+Na]<sup>+</sup> 1038.7220, found 1038.7230.

Distinguishable resonances of the minor rotamer (2:1 ratio) are given in brackets and assignments denoted with an asterisk.

### Ketone 10

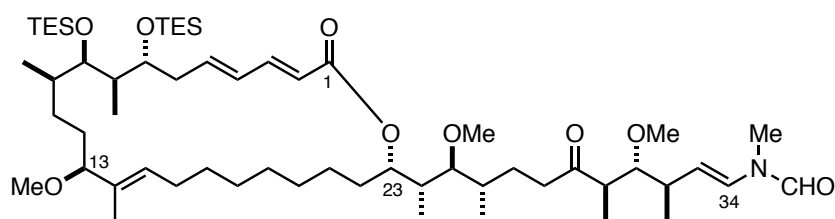

Stryker's reagent solution (104 μL, 0.0026 mmol, 0.025 M in PhMe) was added to enone **26a** (54 mg, 0.052 mmol) and the reaction mixture stirred at room temperature for 1 h. Further aliquots of Stryker's reagent solution (100 μL) were added every hour for a further 4 h. The solution was applied directly to a silica gel column and the product eluted with EtOAc/CH<sub>2</sub>Cl<sub>2</sub> (1:4) to afford ketone **10** (48 mg, 89%) as a colourless oil.

R<sub>f</sub> 0.88 (1:1 EtOAc/PE); <sup>1</sup>H NMR (500 MHz, CDCl<sub>3</sub>) δ<sub>H</sub> 8.29 (0.67H, s, NCHO), [8.08] (0.33H, s, NCHO\*), 7.28 (1H, dd,  $J = 15.4, 10.6$  Hz, H<sub>3</sub>), [7.15] (0.33H, d,  $J = 14.6$  Hz, H<sub>34</sub>\*), 6.46 (0.67H, d,  $J = 14.6$  Hz, H<sub>34</sub>), 6.24-6.12 (2H, m, H<sub>4</sub>, H<sub>5</sub>), 5.83 (1H, d,  $J = 15.3$  Hz, H<sub>2</sub>), 5.42 (1H, d,  $J = 11.5$  Hz, H<sub>23</sub>), 5.23 (1H, t,  $J = 8.4$  Hz, H<sub>15</sub>), 5.15 (1H, dd,  $J = 14.6, 9.8$  Hz, H<sub>33</sub>), 3.67-3.59 (1H, m, H<sub>7</sub>), 3.55-3.49 (1H, m, H<sub>9</sub>), 3.47 (3H, s, OMe), 3.33 (3H, s, OMe), 3.23-3.27 (2H, m, H<sub>13</sub>, H<sub>31</sub>), 3.14 (3H, s, OMe), [3.07] (1H, s, NMe\*), 3.03 (2H, s, NMe), 2.82-2.74 (1H, m, H<sub>25</sub>), 2.72-2.62 (1H, m, H<sub>30</sub>), 2.61-2.50 (1H, m, H<sub>28a</sub>), 2.50-2.35 (2H, m, H<sub>28b</sub>, H<sub>32</sub>), 2.35-2.26 (1H, m, H<sub>6a</sub>), 2.16-1.97 (2H, m, H<sub>6b</sub>, H<sub>16a</sub>), 1.88-1.79 (1H, m, H<sub>16b</sub>), 1.78-1.49 (8H, m, H<sub>8</sub>, H<sub>10</sub>, H<sub>12</sub> × 2, H<sub>22a</sub>, H<sub>24</sub>, H<sub>26</sub>, H<sub>27a</sub>), 1.47 (3H, s, Me<sub>14</sub>), 1.43-1.33 (3H, m, H<sub>11a</sub>, H<sub>22b</sub>, H<sub>27b</sub>), 1.32-1.19 (11H, m, H<sub>17-21</sub>, H<sub>11b</sub>), 1.15 (3H, d,  $J = 7.5$  Hz, Me<sub>32</sub>), 0.96-0.87 (33H, m, Me<sub>8</sub>, Me<sub>10</sub>, Me<sub>24</sub>, Me<sub>26</sub>, Me<sub>30</sub>, Si(CH<sub>2</sub>CH<sub>3</sub>)<sub>3</sub>), 0.60 (6H, q,  $J = 7.7$  Hz, Si(CH<sub>2</sub>CH<sub>3</sub>)<sub>3</sub>), 0.58 (6H, q,  $J$

= 7.7 Hz, Si(CH<sub>2</sub>CH<sub>3</sub>)<sub>3</sub>); <sup>13</sup>C NMR (125 MHz, CDCl<sub>3</sub>) δ<sub>C</sub> [214.3], 214.2, 167.2, 162.1, [160.8], 144.9, 134.9, 133.2, 130.2, 130.0, 128.9, [124.5], 119.8, [113.2], 111.3, 88.0, 87.4, 87.3, 74.4, 73.4, 73.2, 61.4, 61.3, 55.5, [49.2], 49.1, 42.0, 41.0, 40.4, [37.7], 37.5, 36.5, 34.4, 33.7, [33.1], 31.4, 29.7, 29.0, 28.6, 28.3, 28.0, 27.8, 27.7, [27.4], 24.6, 23.4, [19.4], 19.3, 17.4, 14.5, 13.6, 13.5, 10.8, 9.8, 7.1, 7.0, 5.4, 5.2; [α]<sub>D</sub><sup>20</sup> -22.5 (c 1.00, CHCl<sub>3</sub>); IR (thin film) ν<sub>max</sub> (cm<sup>-1</sup>) 2934, 2869, 1706, 1657, 1458, 1369, 1238, 1068, 1004, 725; HRMS calc. for C<sub>58</sub>H<sub>107</sub>NO<sub>9</sub>Si<sub>2</sub>Na [M+Na]<sup>+</sup> 1040.7377, found 1040.7353.

Distinguishable resonances of the minor rotamer (2:1 ratio) are given in brackets and assignments denoted with an asterisk.

### Diol (Aplyronine C/scytophycin hybrid) **9**

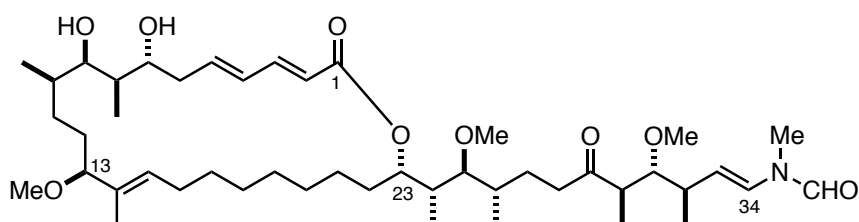

A stock solution of HF·pyridine was prepared by adding HF·pyridine (100 μL) to a solution of pyridine (200 μL) in THF (1 mL) at 0 °C before warming to rt and stirring for 30 min. This solution was added to *bis*-TES ether **10** (8 mg, 7.9 μmol) in a plastic reaction vessel at 0 °C and the reaction stirred at rt overnight. The reaction was quenched at 0 °C with NaHCO<sub>3</sub> solution (5 mL), stirred vigorously at rt for 30 min and the aqueous phase extracted with EtOAc (3 × 5 mL). The combined organics were dried (Na<sub>2</sub>SO<sub>4</sub>) and concentrated *in vacuo*. Purification *via* flash column chromatography (1:1:0 → 10:10:1 EtOAc/CH<sub>2</sub>Cl<sub>2</sub>/MeOH) yielded diol **9** (5.3 mg, 85%) as a colourless oil.

**R<sub>f</sub>** 0.52 (5:5:1 EtOAc/CH<sub>2</sub>Cl<sub>2</sub>/MeOH); <sup>1</sup>H NMR (500 MHz, CDCl<sub>3</sub>) δ<sub>H</sub> 8.29 (0.67H, s, NCHO), [8.07] (0.33H, s, NCHO\*), 7.27 (1H, obs dd, H<sub>3</sub>), [7.13] (0.33H, d, *J* = 14.8 Hz, H<sub>34</sub>\*), 6.46 (0.67H, d, *J* = 13.6 Hz, H<sub>34</sub>), 6.28 (1H, dd, *J* = 15.4, 11.1 Hz, H<sub>4</sub>), 6.11 (1H, dt, *J* = 15.1, 7.4 Hz, H<sub>5</sub>), 5.84 (1H, d, *J* = 15.0 Hz, H<sub>2</sub>), 5.35 (1H, td, *J* = 10.2, 2.6 Hz, H<sub>23</sub>), 5.30 (1H, t, *J* = 7.9 Hz, H<sub>15</sub>), 5.11 (1H, dd, *J* = 14.3, 9.5 Hz, H<sub>33</sub>), 3.89-3.82 (1H, m, H<sub>7</sub>), 3.70-3.64 (1H, m, H<sub>9</sub>), 3.46 (3H, s, OMe), 3.38-3.35 (1H, m, H<sub>13</sub>), 3.34 (3H, s, OMe), 3.31 (1H, br d, *J* = 9.3 Hz, H<sub>31</sub>), 3.15 (3H, s, OMe), [3.08] (1H, s, NMe\*), 3.04 (2H, s, NMe), 2.82-2.74 (2H, m, H<sub>25</sub>, OH), 2.71-2.62 (1H, m, H<sub>30</sub>), 2.59-2.52 (3H, m, H<sub>6</sub> × 2, H<sub>28a</sub>), 2.49-2.32 (3H, m, H<sub>28b</sub>, H<sub>32</sub>, OH), 2.09-1.94 (2H, m, H<sub>16</sub> × 2), 1.80-1.54 (8H, m, H<sub>8</sub>, H<sub>10</sub>, H<sub>12</sub> × 2, H<sub>22a</sub>, H<sub>24</sub>, H<sub>26</sub>, H<sub>27a</sub>), 1.53-1.47 (1H, m, H<sub>11a</sub>), 1.47 (3H, s, Me<sub>14</sub>), 1.47-1.33 (2H, m, H<sub>22b</sub>, H<sub>27b</sub>), 1.32-1.19 (11H, m, H<sub>11b</sub>, H<sub>17-21</sub>),

1.16 (3H, d,  $J = 6.8$  Hz, Me<sub>32</sub>), 1.04 (3H, d,  $J = 7.1$  Hz, Me<sub>24</sub>), 0.97 (3H, d,  $J = 6.8$  Hz, Me<sub>8</sub>), 0.90 (3H, d,  $J = 7.1$  Hz, Me<sub>30</sub>), 0.90 (3H, d,  $J = 7.1$  Hz, Me<sub>26</sub>), 0.79 (3H, d,  $J = 7.2$  Hz, Me<sub>10</sub>); <sup>13</sup>C NMR (125 MHz, CDCl<sub>3</sub>)  $\delta_c$  [214.3], 214.2, 167.0, 162.2, [160.9], 144.3, 138.9, 133.7, 131.0, 129.9, 128.8, [124.7], 120.6, [113.3], 111.4, 87.9, 87.5, 87.3, 75.3, 75.2, 73.8, 61.4, 61.3, 55.7, 49.1, 42.1, 40.7, 39.0, [37.7], 37.5, 37.0, 34.5, 33.7, [33.1], 30.9, 29.7, 28.8, 28.7, 28.5, 27.8, 27.6, 27.3, 25.1, 23.5, 19.5, 17.4, 15.8, 13.5, 11.6, 10.9, 10.3;  $[\alpha]_D^{20} -46.8$  ( $c$  0.21, CHCl<sub>3</sub>); IR (thin film)  $\nu_{max}$  (cm<sup>-1</sup>) 3349, 2939, 2853, 1703, 1655, 1461, 1360, 1277, 1134, 1065, 1002, 970, 800, 725; HRMS calc. for C<sub>46</sub>H<sub>79</sub>NO<sub>9</sub>Na [M+Na]<sup>+</sup> 812.5647, found 812.5643.

Distinguishable resonances of the minor rotamer (2:1 ratio) are given in brackets and assignments denoted with an asterisk.

### Aplyronine A,D/scytophycin hybrid (bearing *S*-TMSer) *S*-8

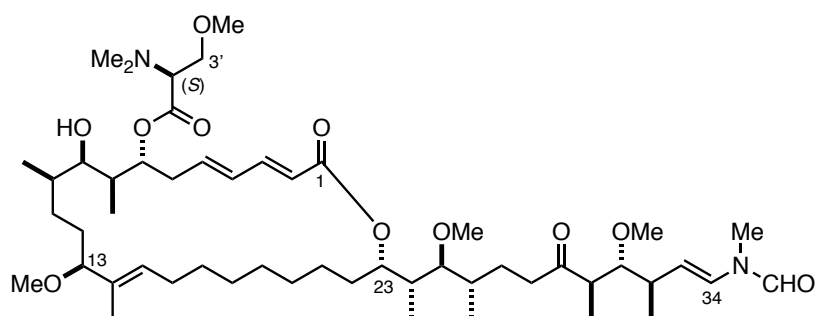

(*S*)-Trimethyl serine (3.9 mg, 26.5  $\mu$ mol) and DMAP (3.2 mg, 26.3  $\mu$ mol) were dissolved in CH<sub>2</sub>Cl<sub>2</sub> (3 mL), then TCBC (8  $\mu$ L, 51.1  $\mu$ mol) and NEt<sub>3</sub> (11  $\mu$ L, 78.9  $\mu$ mol) were added to form a stock solution of mixed anhydride. Diol **9** (2 mg, 2.65  $\mu$ mol) was dissolved in benzene (0.30 mL) and an aliquot of the stock solution (0.30 mL) was added at 0 °C. Further aliquots of stock solution (0.15 mL) were added hourly for 4 h. The reaction was then quenched with MeOH (0.5 mL) and concentrated *in vacuo*. The crude residue was purified by preparative thin layer chromatography (4:4:1 EtOAc/CH<sub>2</sub>Cl<sub>2</sub>/MeOH) to give ester *S*-**8** as a colourless oil (1.5 mg, 62%).

**R<sub>f</sub>** 0.57 (4:4:1 EtOAc/CH<sub>2</sub>Cl<sub>2</sub>/MeOH); <sup>1</sup>H NMR (500 MHz, CDCl<sub>3</sub>)  $\delta_H$  8.29 (0.67H, s, NCHO), [8.07] (0.33H, s, NCHO\*), 7.23 (1H, obs dd, H<sub>3</sub>), [7.12] (0.33H, d,  $J = 14.8$  Hz, H<sub>34</sub>\*), 6.45 (0.67H, d,  $J = 14.2$  Hz, H<sub>34</sub>), 6.26 (1H, dd,  $J = 14.7, 11.2$  Hz, H<sub>4</sub>), 6.04 (1H, dt,  $J = 14.7, 6.7$  Hz, H<sub>5</sub>), 5.86 (1H, d,  $J = 15.1$  Hz, H<sub>2</sub>), 5.38 (1H, br d,  $J = 10.8$  Hz, H<sub>23</sub>), 5.28 (1H, t,  $J = 7.5$  Hz, H<sub>15</sub>), 5.11 (1H, dd,  $J = 14.5, 9.6$  Hz, H<sub>33</sub>), 5.00-4.95 (1H, m, H<sub>7</sub>), 3.67 (1H, dd,  $J = 9.9, 2.8$

Hz, H<sub>3'a</sub>), 3.64 (1H, dd,  $J = 8.3, 4.0$  Hz, H<sub>3'b</sub>), 3.61-3.58 (1H, m, H<sub>9</sub>), 3.46 (3H, s, OMe), 3.42-3.39 (1H, m, H<sub>2'</sub>), 3.38-3.35 (4H, m, H<sub>13</sub>, OMe), 3.34 (3H, s, OMe), 3.31 (1H, br d,  $J = 9.1$  Hz, H<sub>31</sub>), 3.14 (3H, s, OMe), [3.08] (1H, s, NMe\*), 3.04 (2H, s, NMe), 2.78 (1H, dt,  $J = 9.1, 2.5$  Hz, H<sub>25</sub>), 2.72-2.61 (1H, m, H<sub>30</sub>), 2.61-2.51 (2H, m, H<sub>6a</sub>, H<sub>28a</sub>), 2.50-2.40 (3H, m, H<sub>6b</sub>, H<sub>28b</sub>, H<sub>32</sub>), 2.40-2.35 (7H, m, OH, C<sub>2</sub>NMe<sub>2</sub>), 1.95-1.90 (2H, m, H<sub>16</sub> × 2), 1.80-1.70 (3H, m, H<sub>24</sub>, H<sub>26</sub>, H<sub>27a</sub>) 1.65-1.58 (3H, m, H<sub>10</sub>, H<sub>12</sub> × 2), 1.50 (3H, s, Me<sub>14</sub>), 1.46-1.35 (4H, m, H<sub>11a</sub>, H<sub>22</sub> × 2, H<sub>27b</sub>), 1.35-1.19 (11H, m, H<sub>11b</sub>, H<sub>17-21</sub>), 1.16 (3H, d,  $J = 6.9$  Hz, Me<sub>32</sub>), 0.99-0.95 (6H, m, Me<sub>8</sub>, Me<sub>10</sub>), 0.92 (3H, d,  $J = 6.5$  Hz, Me<sub>30</sub>), 0.90 (3H, d,  $J = 6.1$  Hz, Me<sub>24</sub>), 0.88 (3H, d,  $J = 6.9$  Hz, Me<sub>26</sub>); <sup>13</sup>C NMR (125 MHz, CDCl<sub>3</sub>)  $\delta_C$  [214.3], 214.2, 170.2, 167.0, 162.2, [160.9], 144.0, 137.8, 133.8, 131.4, 129.9, 128.7, 128.2, [124.7], 121.2, [113.2], 111.4, 87.8, 87.4, 87.4, 87.3, 74.0, 73.7, 70.5, 67.6, 67.4, 61.4, [61.3], 59.2, 55.6, [49.2], 49.1, 42.5, 42.4, 42.1, [40.8], 40.8, [37.7], 37.5, 36.7, 36.4, 34.6, 34.5, 33.8, [33.1], 31.6, 29.7, 29.4, 28.9, 28.4, 28.1, 27.7, 27.6, 27.4, 22.7, [22.7], [19.4], 19.4, 17.4, 15.5, 13.5, 11.8, 10.9, 10.1; [ $\alpha$ ]<sub>D</sub><sup>20</sup> -22.1 (*c* 0.032, CHCl<sub>3</sub>); IR (thin film)  $\nu_{max}$  (cm<sup>-1</sup>) 3390, 2451, 2896, 2853, 1711, 1678, 1651, 1462, 1360, 1272, 1220, 1079, 1002, 957, 891, 829, 701; HRMS calc. for C<sub>52</sub>H<sub>90</sub>N<sub>2</sub>O<sub>11</sub>K [M+K]<sup>+</sup> 957.6176, found 957.6189.

Distinguishable resonances of the minor rotamer (2:1 ratio) are given in brackets and assignments denoted with an asterisk.

### Aplyronine A,D/scytophycin hybrid (bearing *R*-TMSer) *R*-8

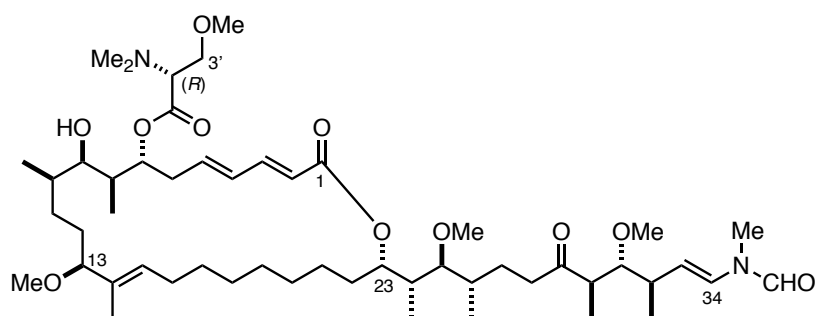

(*R*)-Trimethyl serine (3.9 mg, 26.5  $\mu$ mol) and DMAP (3.2 mg, 26.3  $\mu$ mol) were dissolved in CH<sub>2</sub>Cl<sub>2</sub> (3 mL), then TCBC (8  $\mu$ L, 51.1  $\mu$ mol) and NEt<sub>3</sub> (11  $\mu$ L, 78.9  $\mu$ mol) were added to form a stock solution of mixed anhydride. Diol **9** (2.1 mg, 2.67  $\mu$ mol) was dissolved in benzene (0.30 mL) and an aliquot of the stock solution (0.30 mL) was added at 0 °C. Further aliquots of stock solution (0.30 mL) were added every 30 min for 1.5 h. The reaction was then quenched with MeOH (1.00 mL) and concentrated *in vacuo*. The crude residue was purified by flash



column chromatography (1:1:0 → 4:4:1 EtOAc/CH<sub>2</sub>Cl<sub>2</sub>/MeOH) to give ester **R-8** as a colourless oil (1.8 mg, 73%).

**R<sub>f</sub>** 0.42 (5:5:1 EtOAc/CH<sub>2</sub>Cl<sub>2</sub>/MeOH); **<sup>1</sup>H NMR** (500 MHz, CDCl<sub>3</sub>)  $\delta_{\text{H}}$  8.29 (0.67H, s, NCHO), [8.07] (0.33H, s, NCHO\*), 7.26 (1H, obs dd, H<sub>3</sub>), [7.13] (0.33H, d,  $J = 14.0$  Hz, H<sub>34</sub>\*), 6.46 (0.67H, d,  $J = 14.1$  Hz, H<sub>34</sub>), 6.26 (1H, dd,  $J = 14.6, 11.9$  Hz, H<sub>4</sub>), 6.06-6.00 (1H, m, H<sub>5</sub>), 5.86 (1H, d,  $J = 15.5$  Hz, H<sub>2</sub>), 5.38 (1H, br d,  $J = 10.7$  Hz, H<sub>23</sub>), 5.32-5.26 (1H, m, H<sub>15</sub>), 5.09 (1H, dd,  $J = 14.3, 9.1$  Hz, H<sub>33</sub>), 4.99-4.95 (1H, m, H<sub>7</sub>), 3.69 (2H, app d,  $J = 6.4$  Hz, H<sub>3</sub>' × 2), 3.59-3.56 (1H, m, H<sub>9</sub>), 3.46 (3H, s, OMe), 3.46-3.40 (1H, m, H<sub>2</sub>'), 3.37-3.35 (4H, m, H<sub>13</sub>, OMe), 3.34 (3H, s, OMe), 3.31 (1H, br d,  $J = 10.9$  Hz, H<sub>31</sub>), 3.14 (2H, s, OMe), [3.12] (1H, s, OMe\*), [3.08] (1H, s, NMe\*), 3.04 (2H, s, NMe), 2.78 (1H, dt,  $J = 8.2, 3.1$  Hz, H<sub>25</sub>), 2.72-2.62 (1H, m, H<sub>30</sub>), 2.61-2.42 (5H, m, H<sub>6</sub> × 2, H<sub>28</sub> × 2, H<sub>32</sub>), 2.40-2.35 (7H, m, OH, C<sub>2</sub>'NMe<sub>2</sub>), 1.96-1.90 (2H, m, H<sub>16</sub> × 2), 1.82-1.71 (3H, m, H<sub>24</sub>, H<sub>26</sub>, H<sub>27a</sub>) 1.65-1.59 (3H, m, H<sub>10</sub>, H<sub>12</sub> × 2), 1.51 (3H, s, Me<sub>14</sub>), 1.43-1.35 (4H, m, H<sub>11a</sub>, H<sub>22</sub> × 2, H<sub>27b</sub>), 1.35-1.17 (11H, m, H<sub>11b</sub>, H<sub>17-21</sub>), 1.15 (3H, d,  $J = 7.0$  Hz, Me<sub>32</sub>), 0.99-0.95 (6H, m, Me<sub>8</sub>, Me<sub>10</sub>), 0.92 (3H, d,  $J = 6.6$  Hz, Me<sub>30</sub>), 0.90 (3H, d,  $J = 6.4$  Hz, Me<sub>24</sub>), 0.88 (3H, d,  $J = 7.0$  Hz, Me<sub>26</sub>); **<sup>13</sup>C NMR** (125 MHz, CDCl<sub>3</sub>)  $\delta_{\text{C}}$  [214.3], 214.2, 169.9, 166.9, 162.2, [160.8], 143.8, 138.8, 137.6, 133.8, 132.1, 131.5, 129.9, 128.7, 128.5, 127.7, 125.0, [124.7], 121.2, [113.2], 111.4, 87.8, 87.4, 87.4, 87.3, 74.0, 73.7, 71.3, 67.2, 61.4, [61.4], 61.3, 59.1, 55.6, [49.2], 49.1, 42.3, 42.1, 40.8, [37.7], 37.5, 36.6, 36.3, 34.6, 34.5, 33.8, [33.1], 30.5, 29.7, 29.4, 29.0, 28.4, 28.2, 27.7, 27.6, 27.5, 22.7, [19.4], 19.4, 17.4, 15.5, [13.6], 13.5, 11.6, 10.9, [10.9], 10.1;  $[\alpha]_{\text{D}}^{20} -7.1$  ( $c$  0.028, CHCl<sub>3</sub>); **IR** (thin film)  $\nu_{\text{max}}$  (cm<sup>-1</sup>) 3392, 2896, 2846, 1710, 1675, 1651, 1461, 1343, 1288, 1221, 1082, 1003, 960, 892, 829, 700; **HRMS** calc. for C<sub>52</sub>H<sub>90</sub>N<sub>2</sub>O<sub>11</sub>Na [M+Na]<sup>+</sup> 941.6442, found 941.6402.

Distinguishable resonances of the minor rotamer (2:1 ratio) are given in brackets and assignments denoted with an asterisk.

## Alcohol 27a

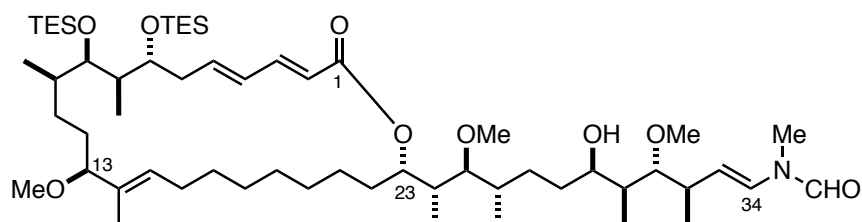

Zn(BH<sub>4</sub>)<sub>2</sub> solution (1.12 mL, 0.175 M in Et<sub>2</sub>O, 0.196 mmol) was added to ketone **10** (20 mg, 0.0196 mmol) at 0 °C and the reaction stirred at this temperature for 5 h before being quenched with NH<sub>4</sub>Cl (5 mL) and Na<sup>+</sup>/K<sup>+</sup> tartrate solution (10 mL). The quenching mixture was stirred vigorously for 3 h then extracted with CH<sub>2</sub>Cl<sub>2</sub> (3 × 10 mL). The combined organics were dried over Na<sub>2</sub>SO<sub>4</sub> and concentrated *in vacuo*. The crude product was purified by flash chromatography (1:0 → 4:1 → 1:1 CH<sub>2</sub>Cl<sub>2</sub>/EtOAc) to yield alcohol **27a** as a colourless oil (11.5 mg, 58%, 2:1 *dr*).

**R<sub>f</sub>** 0.45 (1:2 EtOAc/CH<sub>2</sub>Cl<sub>2</sub>); **<sup>1</sup>H NMR** (500 MHz, CDCl<sub>3</sub>)  $\delta_{\text{H}}$  8.29 (0.66H, s, NCHO), [8.07] (0.33H, s, NCHO\*), 7.28 (1H, dd, *J* = 15.2, 9.8 Hz, H<sub>3</sub>), [7.15] (0.33H, d, *J* = 14.7 Hz, H<sub>34</sub>\*), 6.49 (0.66H, d, *J* = 14.3 Hz, H<sub>34</sub>), 6.24-6.14 (2H, m, H<sub>4</sub>, H<sub>5</sub>), 5.84 (1H, d, *J* = 15.1 Hz, H<sub>2</sub>), 5.42 (1H, dd, *J* = 10.9, 2.0 Hz, H<sub>23</sub>), 5.24 (1H, t, *J* = 7.8 Hz, H<sub>15</sub>), [5.15] (0.37H, dd, *J* = 15.2, 8.8 Hz, H<sub>33</sub>\*), 5.07 (0.60H, dd, *J* = 14.2, 8.3 Hz, H<sub>33</sub>), 3.90-3.83 (1H, m, H<sub>29</sub>), 3.67-3.61 (1H, m, H<sub>7</sub>), 3.55-3.40 (1H, m, H<sub>9</sub>), 3.48 (3H, s, OMe), 3.46 (3H, s, OMe), 3.30 (1H, dd, *J* = 8.1, 5.9 Hz, H<sub>13</sub>), [3.06] (1H, s, NMe\*), 3.02 (2H, s, NMe), 3.01 (1H, obs dd, H<sub>31</sub>), 2.79 (1H, dd, *J* = 11.0, 2.1 Hz, H<sub>25</sub>), 2.60-2.46 (1H, m, H<sub>32</sub>), 2.38-2.27 (1H, m, H<sub>6a</sub>), 2.17-2.00 (3H, m, H<sub>6b</sub>, H<sub>16</sub> × 2), 1.88-1.77 (1H, m, H<sub>22a</sub>), 1.75-1.61 (4H, m, H<sub>8</sub>, H<sub>22b</sub>, H<sub>24</sub>, H<sub>26</sub>), 1.61-1.55 (4H, m, H<sub>10</sub>, H<sub>12</sub> × 2, H<sub>30</sub>), 1.51-1.48 (2H, m, H<sub>28</sub> × 2), 1.47 (3H, s, Me<sub>14</sub>), 1.43-1.33 (4H, m, H<sub>11</sub> × 2, H<sub>27</sub> × 2), 1.31-1.20 (10H, m, H<sub>17-21</sub>), [1.10] (1H, d, *J* = 6.7 Hz, Me<sub>32</sub>\*), 1.07 (2H, d, *J* = 6.7 Hz, Me<sub>32</sub>), 1.00 (3H, d, *J* = 6.7 Hz, Me<sub>26</sub>), 0.97 (3H, obs d, Me<sub>8</sub>), 0.96 (9H, t, *J* = 8.3 Hz, Si(CH<sub>2</sub>CH<sub>3</sub>)<sub>3</sub>), 0.95 (9H, t, *J* = 8.3 Hz, Si(CH<sub>2</sub>CH<sub>3</sub>)<sub>3</sub>), 0.92-0.86 (9H, m, Me<sub>10</sub>, Me<sub>24</sub>, Me<sub>30</sub>), 0.60 (6H, q, *J* = 8.0 Hz, Si(CH<sub>2</sub>CH<sub>3</sub>)<sub>3</sub>), 0.58 (6H, q, *J* = 8.0 Hz, Si(CH<sub>2</sub>CH<sub>3</sub>)<sub>3</sub>); **<sup>13</sup>C NMR** (125 MHz, CDCl<sub>3</sub>)  $\delta_{\text{C}}$  167.3, 162.2, [160.8], 144.9, 135.2, 134.5, 133.1, 132.1, 131.9, 130.1, 129.9, 128.5, 125.0, [124.5], 122.3, 119.8, 114.5, [113.0], 90.5, 90.1, 88.0, [87.6], 87.5, 74.3, 73.6, 73.3, 71.8, 71.5, 61.9, [61.2], 55.4, [40.9], 40.4, 40.1, 39.3, 38.8, 38.1, 35.5, 33.7, [33.1], 31.9, 31.4, 30.7, 29.7, 29.6, 29.1, 28.9, 28.7, 28.3, 27.9, 27.7, 27.5, 26.6, 25.7, 24.6, 23.4, 22.7, 18.8, 17.7, 14.5, 14.1, [10.9], 10.8, 9.8, 9.7, 7.1, 7.0, 5.4, 5.2;  **$[\alpha]_{\text{D}}^{20}$**  -15.1 (*c* 0.46, CHCl<sub>3</sub>); **IR** (thin film)  $\nu_{\text{max}}$  (cm<sup>-1</sup>)

3445, 2933, 2876, 1698, 1657, 1461, 1240, 1225, 1006, 727, 669; **HRMS** calc. for  $C_{58}H_{109}NO_9Si_2Na$   $[M+Na]^+$  1042.7533, found 1042.7539.

Distinguishable resonances of the minor rotamer (2:1 ratio) are given in brackets and assignments denoted with an asterisk.

*The configuration at C23 was confirmed by synthesising the diastereomeric Mosher esters for analysis:*

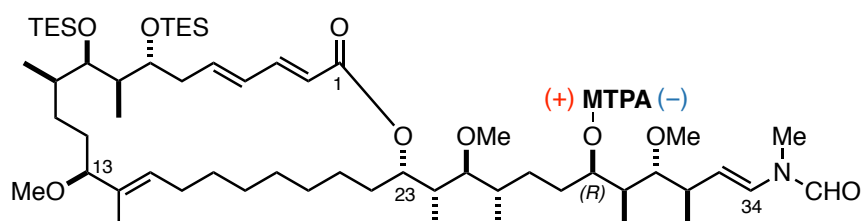

To a solution of alcohol **27** (2 mg, 1.96  $\mu$ mol) in  $CH_2Cl_2$  (0.10 mL) was added DMAP (1 crystal), DMAP hydrochloride (1 crystal), DCC (7  $\mu$ L, 1M in  $CH_2Cl_2$ , 9.82  $\mu$ mol) and (*R*)-(-)-MTPA OH (2 mg, 9.82  $\mu$ mol) and the mixture was stirred for 16 h. Once complete, the reaction was purified by flash column chromatography (1:4 EtOAc/ $CH_2Cl_2$ ) to give (*R*)-Mosher ester *R*-MTPA-**27a** as a colourless oil (1.5 mg, 63%). The corresponding (*S*)-Mosher ester was synthesised from **27a** (1.8 mg, 1.77  $\mu$ mol) to generate *S*-MTPA-**27a** as a colourless oil (1.6 mg, 72%).

### *S*-MTPA-**27a**

**R<sub>f</sub>** 0.78 (1:3 EtOAc/ $CH_2Cl_2$ ); **<sup>1</sup>H NMR** (500 MHz,  $CDCl_3$ )  $\delta_H$  8.27 (0.66H, s, NCHO), [8.05] (0.33H, s, NCHO\*), 7.62-7.56 (2H, m, ArH), 7.43-7.37 (3H, m, ArH), 7.29 (1H, obs dd, H<sub>3</sub>), [7.10] (0.33H, d,  $J = 14.5$  Hz, H<sub>34</sub>\*), 6.41 (0.66H, d,  $J = 14.5$  Hz, H<sub>34</sub>), 6.24-6.14 (2H, m, H<sub>4</sub>, H<sub>5</sub>), 5.83 (1H, d,  $J = 15.5$  Hz, H<sub>2</sub>), 5.39 (1H, dd,  $J = 10.7, 2.4$  Hz, H<sub>23</sub>), 5.35 (1H, app q,  $J = 8.4$  Hz, H<sub>29</sub>), 5.24 (1H, t,  $J = 8.2$  Hz, H<sub>15</sub>), [5.10] (0.37H, dd,  $J = 14.3, 8.2$  Hz, H<sub>33</sub>\*), 5.04 (0.6H, dd,  $J = 14.7, 8.2$  Hz, H<sub>33</sub>), 3.67-3.59 (1H, m, H<sub>7</sub>), 3.57 (3H, s, OMe), 3.55-3.40 (1H, m, H<sub>9</sub>), 3.45 (3H, s, OMe), 3.39 (3H, s, OMe), 3.31 (1H, dd,  $J = 8.4, 5.7$  Hz, H<sub>13</sub>), 3.15 (3H, s, OMe), [3.03] (1H, s, NMe\*), 3.00 (2H, s, NMe), 2.75 (1H, dt,  $J = 8.9, 2.2$  Hz, H<sub>25</sub>), 2.64 (1H, td,  $J = 9.6, 1.7$  Hz, H<sub>31</sub>), 2.41-2.24 (3H, m, H<sub>6</sub>  $\times$  2, H<sub>32</sub>), 2.17-2.08 (2H, m, H<sub>16</sub>  $\times$  2), 1.90-1.72 (2H, m, H<sub>8</sub>, H<sub>22a</sub>), 1.65-1.55 (7H, m, H<sub>10</sub>, H<sub>12</sub>  $\times$  2, H<sub>22b</sub>, H<sub>24</sub>, H<sub>26</sub>, H<sub>30</sub>), 1.51-1.44 (5H, m, H<sub>28</sub>  $\times$  2, Me<sub>14</sub>), 1.43-1.35 (4H, m, H<sub>11</sub>  $\times$  2, H<sub>27</sub>  $\times$  2), 1.32-1.22 (10H, m, H<sub>17-21</sub>), 1.09 (3H, d,  $J = 6.8$  Hz, Me<sub>32</sub>), 1.00 (3H, d,  $J = 7.0$  Hz, Me<sub>26</sub>), 0.97 (3H, obs d, Me<sub>8</sub>), 0.96 (9H, t,  $J = 8.2$  Hz, Si( $CH_2CH_3$ )<sub>3</sub>),

0.95 (9H, t,  $J = 8.2$  Hz, Si(CH<sub>2</sub>CH<sub>3</sub>)<sub>3</sub>), 0.89 (3H, d,  $J = 6.6$  Hz, Me<sub>24</sub>), 0.84 (3H, d,  $J = 6.6$  Hz, Me<sub>10</sub>), 0.76 (3H, d,  $J = 6.6$  Hz, Me<sub>30</sub>), 0.60 (6H, q,  $J = 8.2$  Hz, Si(CH<sub>2</sub>CH<sub>3</sub>)<sub>3</sub>), 0.58 (6H, q,  $J = 8.2$  Hz, Si(CH<sub>2</sub>CH<sub>3</sub>)<sub>3</sub>).

### **R-MTPA-27a**

**R<sub>f</sub>** 0.78 (1:3 EtOAc/CH<sub>2</sub>Cl<sub>2</sub>); **<sup>1</sup>H NMR** (500 MHz, CDCl<sub>3</sub>) **δ<sub>H</sub>** 8.27 (0.66H, s, NCHO), [8.05] (0.33H, s, NCHO\*), 7.61-7.56 (2H, m, ArH), 7.44-7.37 (3H, m, ArH), 7.30 (1H, obs dd, H<sub>3</sub>), [7.11] (0.33H, d,  $J = 14.7$  Hz, H<sub>34</sub>\*), 6.43 (0.66H, d,  $J = 14.5$  Hz, H<sub>34</sub>), 6.24-6.14 (2H, m, H<sub>4</sub>, H<sub>5</sub>), 5.84 (1H, d,  $J = 15.1$  Hz, H<sub>2</sub>), 5.38 (1H, dd,  $J = 10.9, 2.1$  Hz, H<sub>23</sub>), 5.36 (1H, app q,  $J = 8.4$  Hz, H<sub>29</sub>), 5.24 (1H, t,  $J = 7.4$  Hz, H<sub>15</sub>), [5.13] (0.47H, dd,  $J = 15.2, 8.8$  Hz, H<sub>33</sub>\*), 5.06 (1H, dd,  $J = 13.9, 7.9$  Hz, H<sub>33</sub>), 3.68-3.61 (1H, m, H<sub>7</sub>), 3.56-3.51 (1H, m, H<sub>9</sub>), 3.49 (3H, s, OMe), 3.47 (3H, s, OMe), 3.38 (3H, s, OMe), 3.31 (1H, dd,  $J = 8.2, 5.9$  Hz, H<sub>13</sub>), 3.15 (3H, s, OMe), [3.04] (1H, s, NMe\*), 3.00 (2H, s, NMe), 2.74 (1H, dt,  $J = 8.8, 2.7$  Hz, H<sub>25</sub>), 2.65 (1H, td,  $J = 9.6, 1.7$  Hz, H<sub>31</sub>), 2.43-2.22 (3H, m, H<sub>6</sub> × 2, H<sub>32</sub>), 2.15-2.08 (2H, m, H<sub>16</sub> × 2), 1.91-1.71 (2H, m, H<sub>8</sub>, H<sub>22a</sub>), 1.65-1.55 (7H, m, H<sub>10</sub>, H<sub>12</sub> × 2, H<sub>22b</sub>, H<sub>24</sub>, H<sub>26</sub>, H<sub>30</sub>), 1.54-1.43 (4H, m, H<sub>28</sub> × 2, Me<sub>14</sub>), 1.42-1.36 (4H, m, H<sub>11</sub> × 2, H<sub>27</sub> × 2), 1.32-1.22 (10H, m, H<sub>17-21</sub>), 1.10 (3H, d,  $J = 6.8$  Hz, Me<sub>32</sub>), 0.99 (3H, d,  $J = 7.0$  Hz, Me<sub>26</sub>), 0.97 (3H, obs d, Me<sub>8</sub>), 0.96 (9H, t,  $J = 8.0$  Hz, Si(CH<sub>2</sub>CH<sub>3</sub>)<sub>3</sub>), 0.95 (9H, t,  $J = 8.0$  Hz, Si(CH<sub>2</sub>CH<sub>3</sub>)<sub>3</sub>), 0.87 (3H, d,  $J = 6.6$  Hz, Me<sub>24</sub>), 0.84 (3H, d,  $J = 6.6$  Hz, Me<sub>10</sub>), 0.78 (3H, d,  $J = 6.6$  Hz, Me<sub>30</sub>), 0.60 (6H, q,  $J = 8.1$  Hz, Si(CH<sub>2</sub>CH<sub>3</sub>)<sub>3</sub>), 0.58 (6H, q,  $J = 8.1$  Hz, Si(CH<sub>2</sub>CH<sub>3</sub>)<sub>3</sub>).

Distinguishable resonances of the minor rotamer (2:1 ratio) are given in brackets and assignments denoted with an asterisk.

Table 2. Diagnostic <sup>1</sup>H NMR signals for the configurational assignment of 29R

| Proton | <b>δ<sub>H</sub></b> (S)-MTPA (ppm) | <b>δ<sub>H</sub></b> (R)-MTPA (ppm) | Δδ <sub>S-R</sub> (ppm) |
|--------|-------------------------------------|-------------------------------------|-------------------------|
| H23    | 5.39                                | 5.38                                | +0.01                   |
| Me24   | 0.89                                | 0.87                                | +0.02                   |
| H25    | 2.75                                | 2.74                                | +0.01                   |
| H29    | 5.35                                | 5.36                                | -0.01                   |
| Me30   | 0.76                                | 0.78                                | -0.02                   |
| H31    | 2.64                                | 2.65                                | -0.01                   |
| Me32   | 1.09                                | 1.10                                | -0.01                   |

## Diol 27

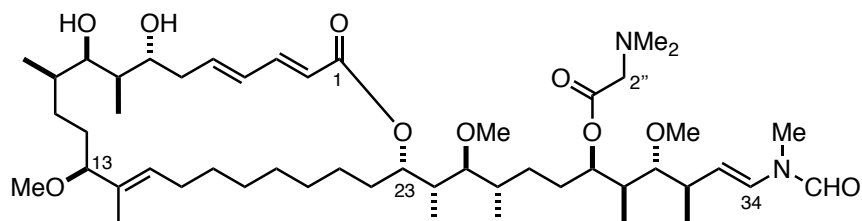

DMAP (11 mg, 8.8  $\mu\text{mol}$ ), DMAP hydrochloride (14 mg, 8.8  $\mu\text{mol}$ ), dimethylglycine (9 mg, 8.8  $\mu\text{mmol}$ ) and alcohol **27a** (9 mg, 8.8  $\mu\text{mmol}$ ) were dissolved in  $\text{CH}_2\text{Cl}_2$  (0.50 mL). DCC (88  $\mu\text{L}$ , 8.8  $\mu\text{mol}$ , 1M in  $\text{CH}_2\text{Cl}_2$ ) was added and the reaction stirred for 16 h before being quenched with  $\text{NaHCO}_3$  (2 mL). The layers were separated, and the aqueous phase extracted with  $\text{CH}_2\text{Cl}_2$  ( $3 \times 5$  mL). The combined organics were dried ( $\text{Na}_2\text{SO}_4$ ), concentrated *in vacuo* and the crude material transferred to a plastic reaction vessel.

A stock solution of HF·pyridine was prepared by adding HF·pyridine (100  $\mu\text{L}$ ) to a solution of pyridine (200  $\mu\text{L}$ ) in THF (1 mL) at 0 °C before warming to rt and stirring for 30 min. This solution was added the crude material 0 °C and the reaction stirred at rt overnight. The reaction was quenched at 0 °C with  $\text{NaHCO}_3$  solution (5 mL), stirred vigorously at rt for 30 min and the aqueous phase extracted with EtOAc ( $3 \times 5$  mL). The combined organics were dried ( $\text{Na}_2\text{SO}_4$ ) and concentrated *in vacuo*. Purification *via* flash column chromatography (1:1:0  $\rightarrow$  4:4:1 EtOAc/ $\text{CH}_2\text{Cl}_2$ /MeOH) yielded diol **27** (5.3 mg, 69%) as a colourless oil.

**R<sub>f</sub>** 0.45 (4:4:1 EtOAc/ $\text{CH}_2\text{Cl}_2$ /MeOH); **<sup>1</sup>H NMR** (500 MHz,  $\text{CDCl}_3$ )  $\delta_{\text{H}}$  8.28 (0.66H, s, NCHO), [8.06] (0.33H, s, NCHO\*), 7.27 (1H, obs dd, H<sub>3</sub>), [7.12] (0.33H, d,  $J = 14.5$  Hz, H<sub>34</sub>\*), 6.45 (0.66H, d,  $J = 14.5$  Hz, H<sub>34</sub>), 6.28 (1H, dd,  $J = 15.3, 11.0$  Hz, H<sub>4</sub>), 6.12 (1H, dt,  $J = 15.2, 7.8$  Hz, H<sub>5</sub>), 5.84 (1H, d,  $J = 15.7$  Hz, H<sub>2</sub>), 5.35-5.27 (2H, m, H<sub>23</sub>, H<sub>29</sub>), 5.24 (1H, t,  $J = 6.9$  Hz, H<sub>15</sub>), 5.11 (1H, dd,  $J = 14.5, 10.0$  Hz, H<sub>33</sub>), 3.88-3.80 (1H, m, H<sub>7</sub>), 3.70-3.59 (1H, m, H<sub>9</sub>), 3.53-3.46 (2H, m, H<sub>27</sub>  $\times 2$ ), 3.44 (3H, s, OMe), 3.43 (3H, s, OMe), 3.41 (1H, obs dd, H<sub>13</sub>), 3.15 (3H, s, OMe), [3.05] (1H, s, NMe\*), 3.00 (2H, s, NMe), 2.81 (1H, dd,  $J = 9.8, 2.1$  Hz, H<sub>25</sub>), 2.75 (1H, dd,  $J = 8.4, 2.4$  Hz, H<sub>31</sub>), 2.59-2.42 (3H, m, H<sub>6</sub>  $\times 2$ , H<sub>32</sub>), 2.39 (6H, s, C<sub>27</sub>-NMe<sub>2</sub>), 2.10-1.99 (2H, m, H<sub>16</sub>  $\times 2$ ), 1.73-1.65 (6H, m, H<sub>8</sub>, H<sub>22a</sub>, H<sub>24</sub>, H<sub>26</sub>, H<sub>28</sub>  $\times 2$ ), 1.64-1.51 (5H, m, H<sub>10</sub>, H<sub>12</sub>  $\times 2$ , H<sub>22b</sub>, H<sub>30</sub>), 1.38-1.31 (4H, m, H<sub>11</sub>  $\times 2$ , H<sub>27</sub>  $\times 2$ ), 1.48 (3H, s, Me<sub>14</sub>), 1.30-1.19 (10H, m, H<sub>17-21</sub>), 1.16 (3H, d,  $J = 6.6$  Hz, Me<sub>32</sub>), 1.04 (3H, d,  $J = 6.6$  Hz, Me<sub>8</sub>), 0.97 (3H, d,  $J = 7.4$  Hz, Me<sub>26</sub>), 0.88-0.82 (6H, m, Me<sub>10</sub>, Me<sub>24</sub>), 0.79 (3H, d,  $J = 7.4$  Hz, Me<sub>30</sub>); **<sup>13</sup>C NMR** (125 MHz,  $\text{CDCl}_3$ )  $\delta_{\text{C}}$  170.2, 167.0, 162.2, [160.9], 156.7, 144.3, 139.0, 133.7, 130.9, 129.9, 128.8, 128.6, [124.6], 120.5, [113.4], 111.7, 87.9, 87.3, 86.6, 75.3, 74.0, 73.9, 61.3, [61.1], 60.3, 55.6, 49.1, 45.2, 40.6, [39.3], 39.1, 39.0, 38.1, [37.8], 37.0, 36.9, 35.2, 33.9, 33.6, [33.1], 30.9, 29.7, 28.8,

28.7, 28.5, 27.8, 27.6, 27.3, 24.9, 20.3, [17.4], 17.3, 15.7, [11.6], 11.1, 10.3, 9.8, 9.7;  $[\alpha]_D^{20}$   $-13.9$  ( $c$  0.16,  $\text{CHCl}_3$ ); **IR** (thin film)  $\nu_{\text{max}}$  ( $\text{cm}^{-1}$ ) 3325, 2952, 2853, 1708, 1690, 1656, 1635, 1559, 1448, 1254, 1159, 1091 975; **HRMS** calc. for  $\text{C}_{50}\text{H}_{88}\text{N}_2\text{O}_{10}\text{Na}$   $[\text{M}+\text{Na}]^+$  899.6337, found 899.6324.

Distinguishable resonances of the minor rotamer (2:1 ratio) are given in brackets and assignments denoted with an asterisk.

### Aplyrologue D (7)

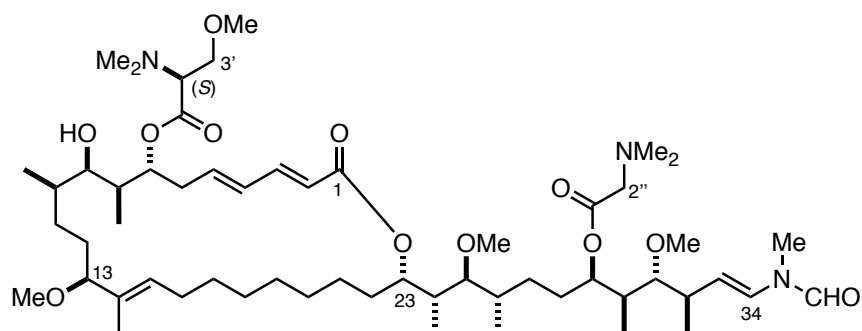

(*S*)-Trimethyl serine (6.7 mg, 46.1  $\mu\text{mol}$ ) and DMAP (5.6 mg, 46.1  $\mu\text{mol}$ ) were dissolved in  $\text{CH}_2\text{Cl}_2$  (3 mL) and TCBC (15  $\mu\text{L}$ , 92.3  $\mu\text{mol}$ ) and  $\text{NEt}_3$  (13  $\mu\text{L}$ , 92.3  $\mu\text{mol}$ ) were added to form a stock solution of mixed anhydride. Diol **27** (2 mg, 46.1  $\mu\text{mol}$ ) was dissolved in benzene (0.30 mL) and an aliquot of the stock solution (0.40 mL) was added at 0  $^\circ\text{C}$ . Further aliquots of stock solution (0.40 mL) were added every 30 min for 2 h. The reaction was then quenched with MeOH (1.5 mL) and concentrated *in vacuo*. The crude residue was purified by flash column chromatography (1:0:0  $\rightarrow$  1:1:0  $\rightarrow$  4:4:1  $\text{CH}_2\text{Cl}_2/\text{EtOAc}/\text{MeOH}$ ) to give aplyrologue D (**7**) as a colourless oil (1.4 mg, 65%).

**R<sub>f</sub>** 0.31 (4:4:1 EtOAc/ $\text{CH}_2\text{Cl}_2$ /MeOH); **<sup>1</sup>H NMR** (500 MHz,  $\text{CDCl}_3$ )  $\delta_{\text{H}}$  8.28 (0.66H, s, NCHO), [8.06] (0.33H, s, NCHO\*), 7.24 (1H, obs dd,  $\text{H}_3$ ), [7.12] (0.33H, d,  $J = 14.4$  Hz,  $\text{H}_{34}$ \*), 6.46 (0.66H, d,  $J = 14.2$  Hz,  $\text{H}_{34}$ ), 6.28 (1H, dd,  $J = 14.8, 11.1$  Hz,  $\text{H}_4$ ), 6.03 (1H, dt,  $J = 15.2, 7.8$  Hz,  $\text{H}_5$ ), 5.86 (1H, d,  $J = 15.4$  Hz,  $\text{H}_2$ ), 5.34 (1H, dt,  $J = 9.5, 2.4$  Hz,  $\text{H}_{15}$ ), 5.31-5.25 (2H, m,  $\text{H}_{23}, \text{H}_{29}$ ), 5.08 (1H, dd,  $J = 14.6, 9.4$  Hz,  $\text{H}_{33}$ ), 5.01-4.95 (1H, m,  $\text{H}_7$ ), 3.82-3.68 (2H, m,  $\text{H}_{3'} \times 2, \text{H}_{2''} \times 2$ ), 3.60-3.55 (1H, m,  $\text{H}_9$ ), 3.44 (3H, s, OMe), 3.43 (3H, s, OMe), 3.37 (3H, s, OMe) 3.42-3.38 (1H, m,  $\text{H}_{2'}$ ), 3.35 (1H, br d,  $J = 6.4$  Hz,  $\text{H}_{13}$ ), 3.15 (3H, s, OMe), [3.05] (1H, s, NMe\*), 3.00 (2H, s, NMe), 2.81 (1H, dd,  $J = 9.1, 2.5$  Hz,  $\text{H}_{25}$ ), 2.76 (1H, dd,  $J = 8.4, 2.7$  Hz,  $\text{H}_{31}$ ), 2.58 (6H, s,  $\text{C}_{2'}\text{-NMe}_2$ ), 2.52 (7H, s,  $\text{C}_{2''}\text{-NMe}_2, \text{H}_{32}$ ), 2.50-2.41 (2H, m,  $\text{H}_6 \times 2$ ), 1.96-1.86 (2H, m,  $\text{H}_{16} \times 2$ ), 1.72-1.66 (4H, m,  $\text{H}_8, \text{H}_{22a}, \text{H}_{24}, \text{H}_{26}$ ), 1.64-1.53 (7H, m,  $\text{H}_{10}, \text{H}_{12} \times 2, \text{H}_{22b}, \text{H}_{28} \times 2, \text{H}_{30}$ ), 1.38-1.29 (4H, m,  $\text{H}_{11} \times 2, \text{H}_{27} \times 2$ ), 1.50 (3H, s,  $\text{Me}_{14}$ ), 1.28-1.19 (10H, m,  $\text{H}_{17}$ -

21), 1.15 (3H, d,  $J = 6.6$  Hz, Me<sub>32</sub>), 0.98 (6H, d,  $J = 7.4$  Hz, Me<sub>8</sub>, Me<sub>26</sub>), 0.88 (3H, d,  $J = 6.8$  Hz, Me<sub>10</sub>), 0.86 (3H, d,  $J = 6.8$  Hz, Me<sub>24</sub>), 0.83 (3H, d,  $J = 7.0$  Hz, Me<sub>30</sub>); <sup>13</sup>C NMR (125 MHz, CDCl<sub>3</sub>)  $\delta_C$  169.1, [168.5], 166.9, 162.2, 160.9, 143.9, 137.7, 135.2, 133.8, 131.4, 129.9, 128.7, 127.6, 125.0, [124.7], 121.1, [113.6], 111.7, 87.7, [87.3], 86.6, 74.1, 73.7, 70.3, 67.0, 61.9, 61.3, [61.3], 59.2, 55.6, 49.2, 45.2, 42.2, 40.8, 39.2, 39.0, 38.1, 37.8, 36.5, 35.2, 34.3, 33.9, 33.7, [33.1], 30.4, 29.7, 29.4, 29.0, 28.4, 28.1, 27.8, 27.6, 27.5, 26.4, 25.9, 23.4, 22.7, 20.1, 17.6, [17.5], 15.5, 14.1, [11.6], 11.1, 10.2, 9.9, 9.8;  $[\alpha]_D^{20}$   $-4.5$  (c 0.056, CHCl<sub>3</sub>); IR (thin film)  $\nu_{max}$  (cm<sup>-1</sup>) 3456, 2940, 2925, 2912, 1714, 1692, 1649, 1613, 1546, 1454, 1368, 1258, 1218, 1129, 1094, 852, 820, 780, 731; HRMS calc. for C<sub>55</sub>H<sub>98</sub>N<sub>3</sub>O<sub>11</sub> [M+H]<sup>+</sup> 992.7151 found 992.7126.

Distinguishable resonances of the minor rotamer (2:1 ratio) are given in brackets and assignments denoted with an asterisk.

## 4. Experimental Procedures for Cell Viability Studies

### 4.1. Cell viability studies

HeLa cells were obtained from the American Type Culture Collection (ATCC) and were maintained in Dulbecco's Modified Eagle Medium (DMEM) supplemented with 10% heat-inactivated FBS and 2 mM L-glutamine.

Cells were seeded at 2,000 cells/well in 96-well plates for 24 h at 37 °C with 5% CO<sub>2</sub>. Serial dilutions of aplyronines (**1-3**) and their analogues (**7-9**) were added to the cells in complete growth medium and incubated at 37 °C with 5% CO<sub>2</sub> for 96 h. Cell viability was measured using CellTiter-Glo viability assay (Promega) according to the manufacturer's instructions. Cell viability was plotted as a percentage of untreated cells. Each measurement was taken in triplicate and three independent repeats were performed from different cell passages. Discodermolide was used as an external control between all tests.

## 4.2. Cytotoxicity graphs

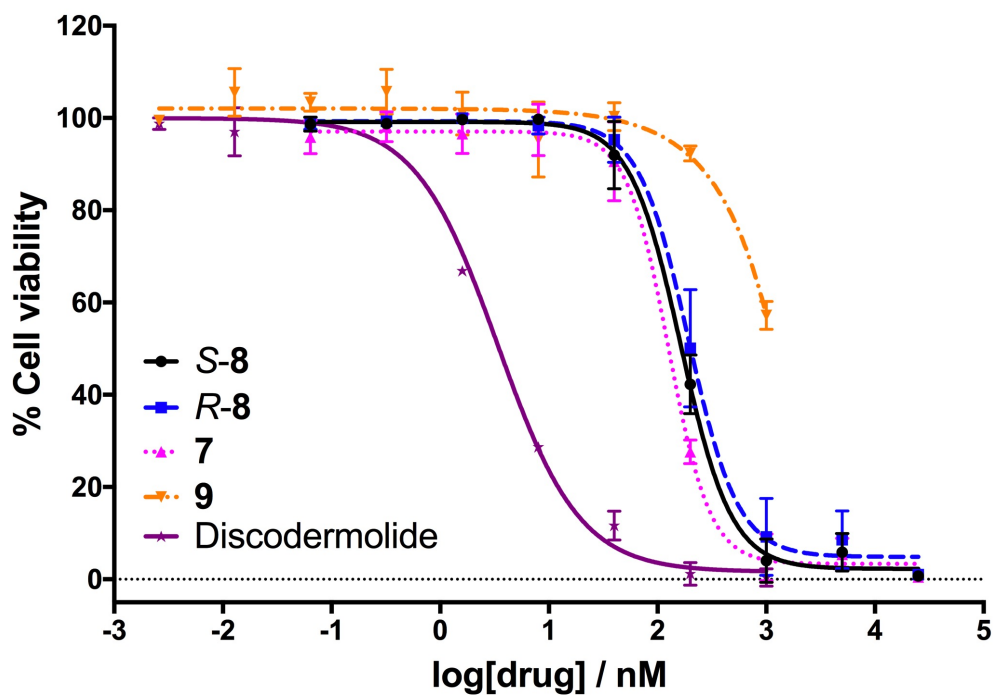

Figure 4. Graph showing cell viability as a function of  $\log[\text{drug}]$  for 7 (aplyrologue D), S-/R-8 (aplyronine A,D/scytophycin hybrid) and 9 (aplyronine C/scytophcin hybrid). Discodermolide was included as an external control

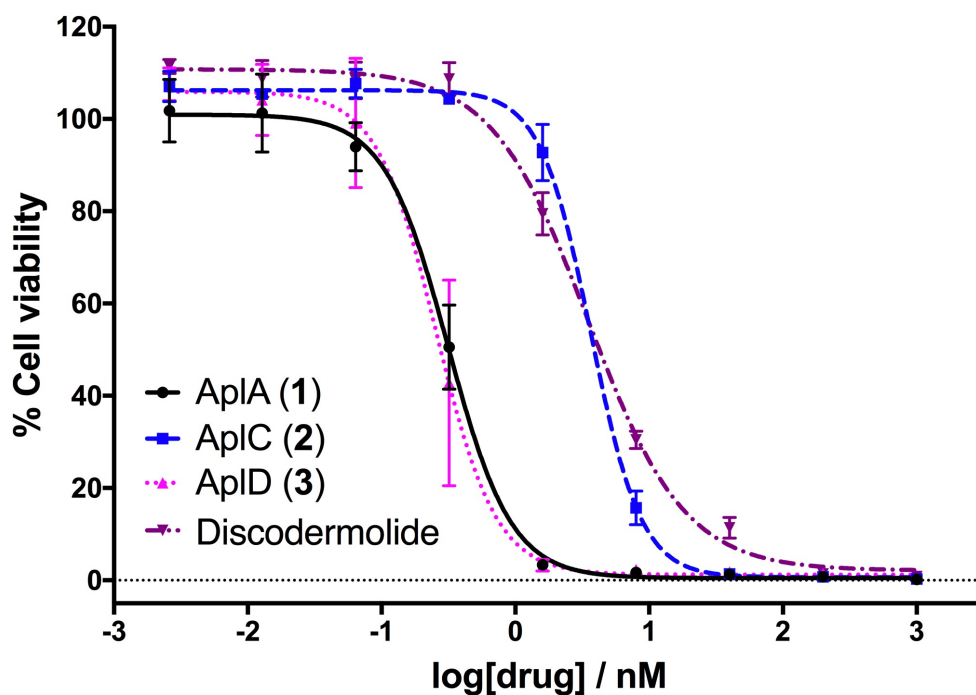

Figure 5. Graph showing cell viability as a function of  $\log[\text{drug}]$  for synthetic aplyronines A (1), C (2) and D (3)<sup>8,9</sup>. Discodermolide was included as an external control



## References

- 1 H. Kigoshi, K. Suenaga, T. Mutou, T. Ishigaki, T. Atsumi, H. Ishiwata, A. Sakakura, T. Ogawa, M. Ojika and K. Yamada, *J. Org. Chem.*, 1996, **61**, 5326–5351.
- 2 K. Kobayashi, Y. Fujii, Y. Hirayama, S. Kobayashi, I. Hayakawa and H. Kigoshi, *Org. Lett.*, 2012, **14**, 1290–1293.
- 3 K. Hirata, S. Muraoka, K. Suenaga, T. Kuroda, K. Kato, H. Tanaka, M. Yamamoto, M. Takata, K. Yamada and H. Kigoshi, *J. Mol. Biol.*, 2006, **356**, 945–954.
- 4 M. Kita, Y. Hirayama, K. Yoneda, K. Yamagishi, T. Chinen, T. Usui, E. Sumiya, M. Uesugi and H. Kigoshi, *J. Am. Chem. Soc.*, 2013, **135**, 18089–18095.
- 5 H. Kigoshi, K. Suenaga, M. Takagi, A. Akao, K. Kanematsu, N. Kamei, Y. Okugawa and K. Yamada, *Tetrahedron*, 2002, **58**, 1075–1102.
- 6 L. Diab, T. Šmejkal, J. Geier and B. Breit, *Angew. Chem. Int. Ed.*, 2009, **48**, 8022–8026.
- 7 M. J. Cryle, P. Y. Hayes and J. J. De Voss, *Chem. Eur. J.*, 2012, **18**, 15994–15999.
- 8 I. Paterson, S. J. Fink, L. Y. W. Lee, S. J. Atkinson and S. B. Blakey, *Org. Lett.*, 2013, **15**, 3118–3121.
- 9 N. Anžiček, S. Williams, M. P. Housden and I. Paterson, *Org. Biomol. Chem.*, 2018, **16**, 1343–1350.

## NMR Spectra for All New Compounds

$^1\text{H}$  and  $^{13}\text{C}$  NMR spectra of all new compounds are presented below.

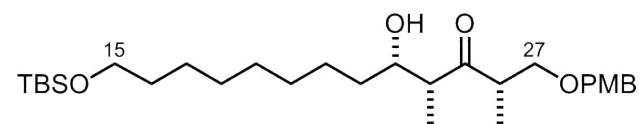

15: <sup>1</sup>H NMR (500 MHz)

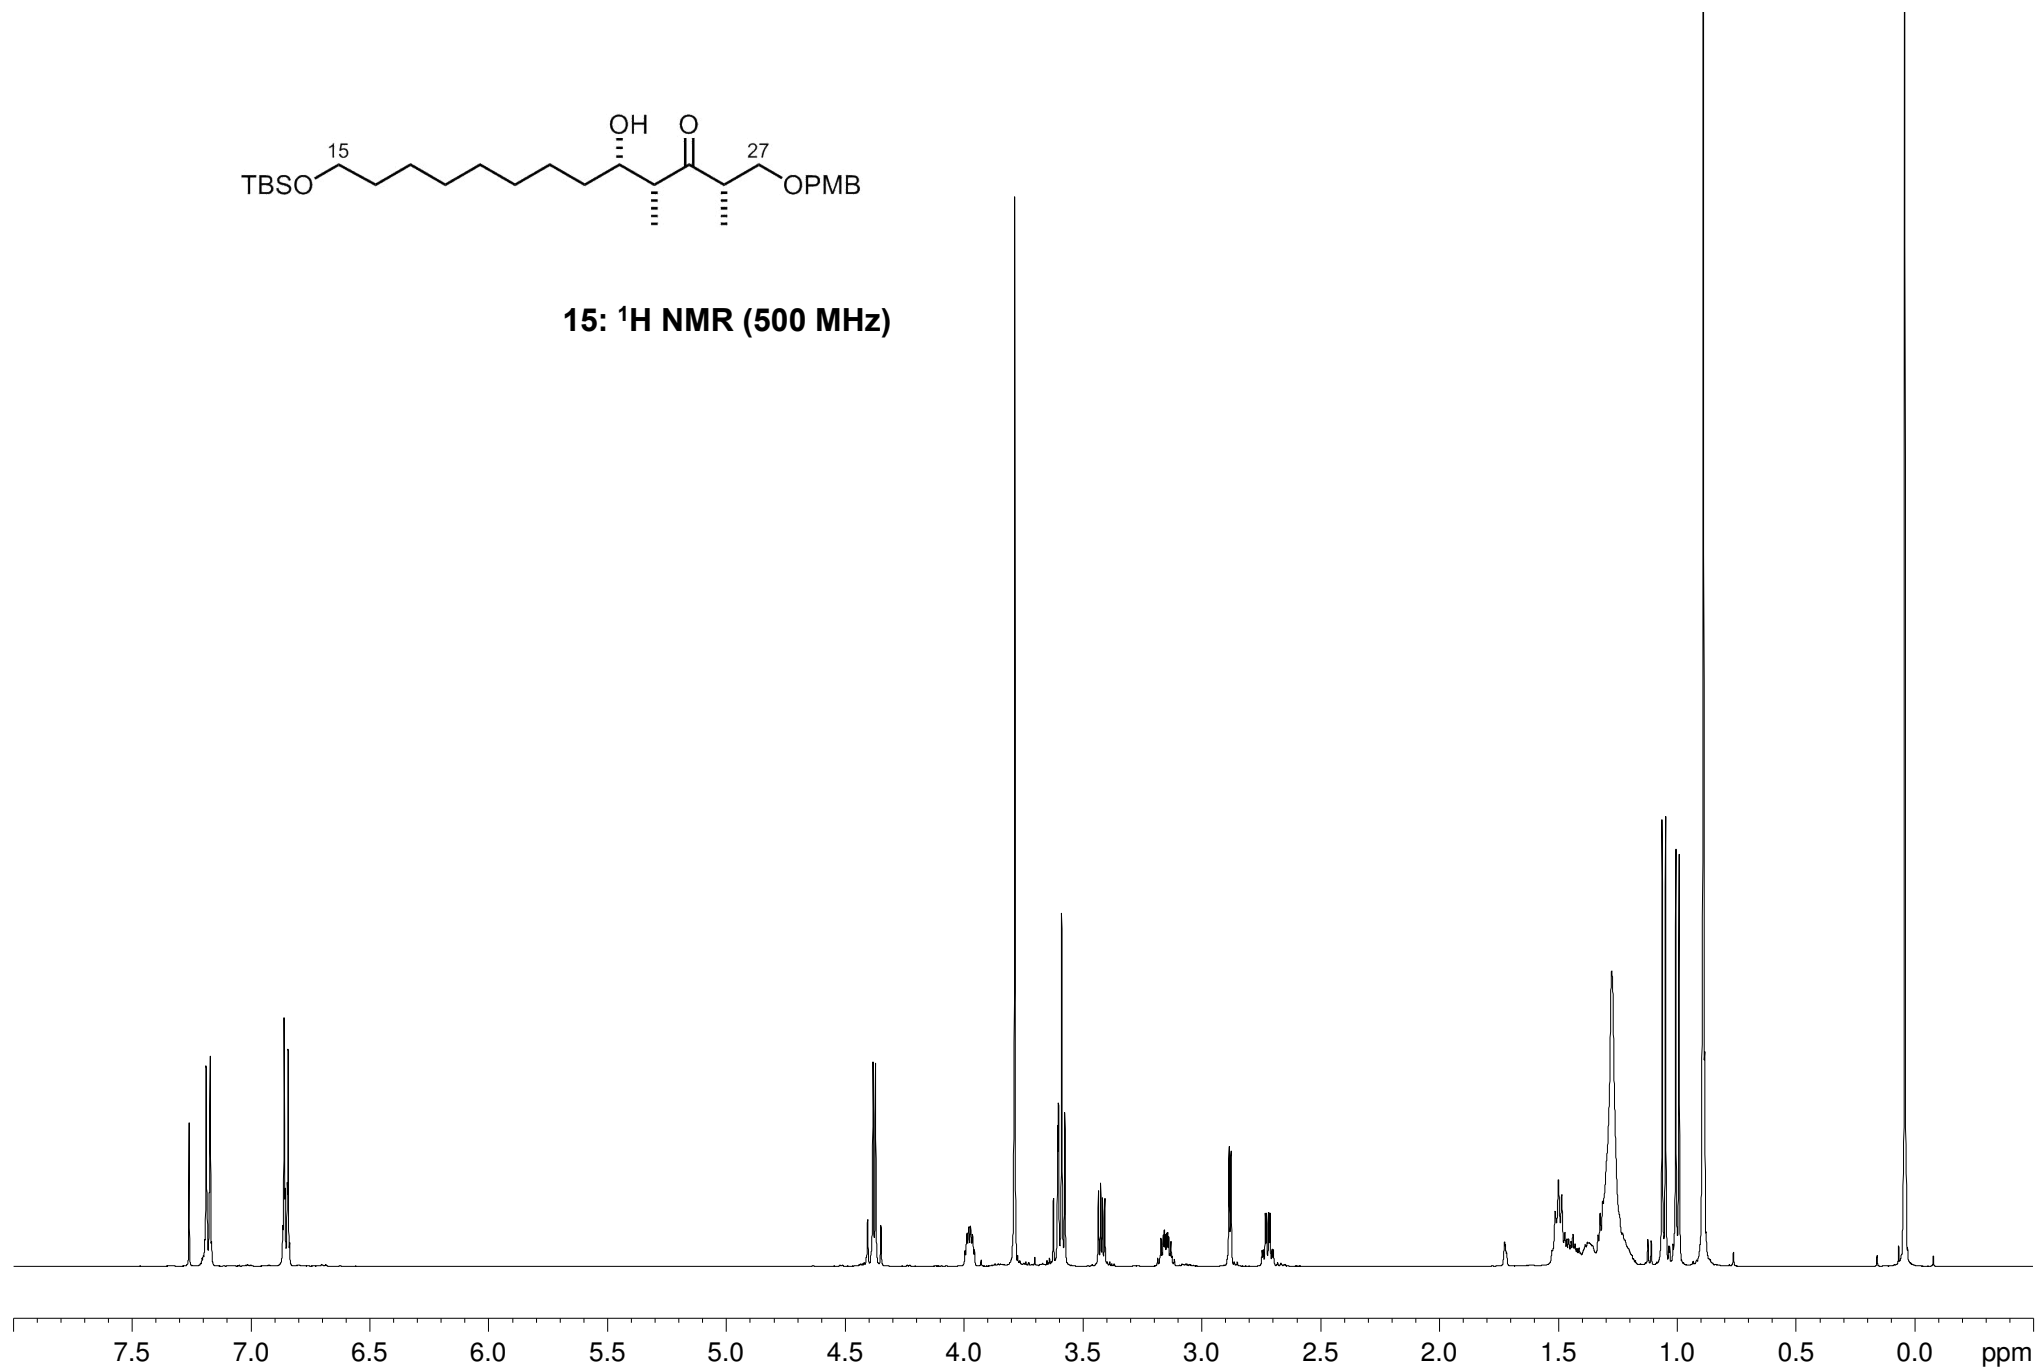



15:  $^{13}\text{C}$  NMR (125 MHz)

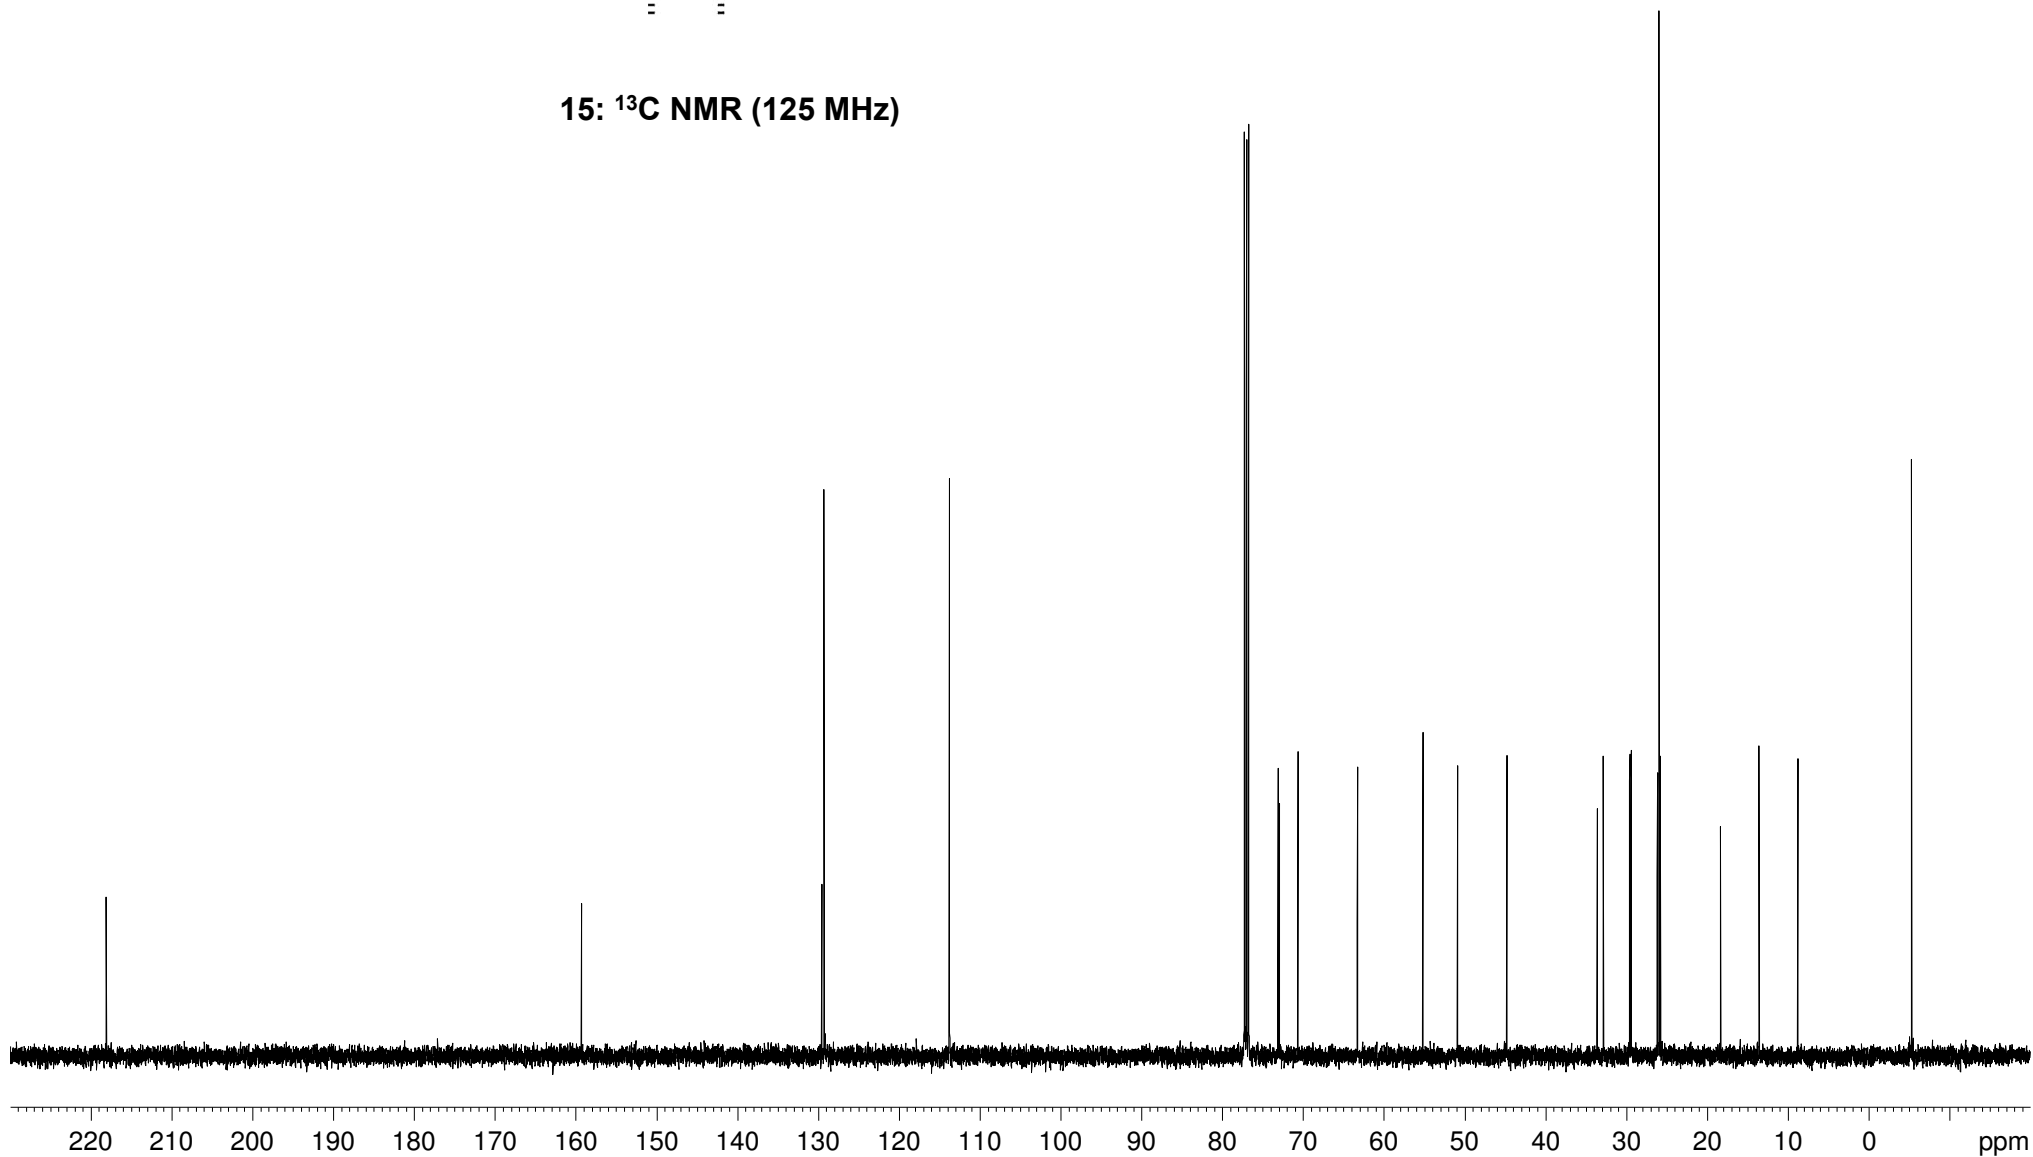

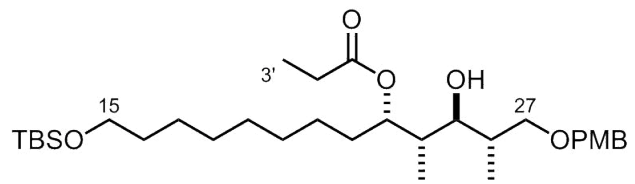

16: <sup>1</sup>H NMR (500 MHz)

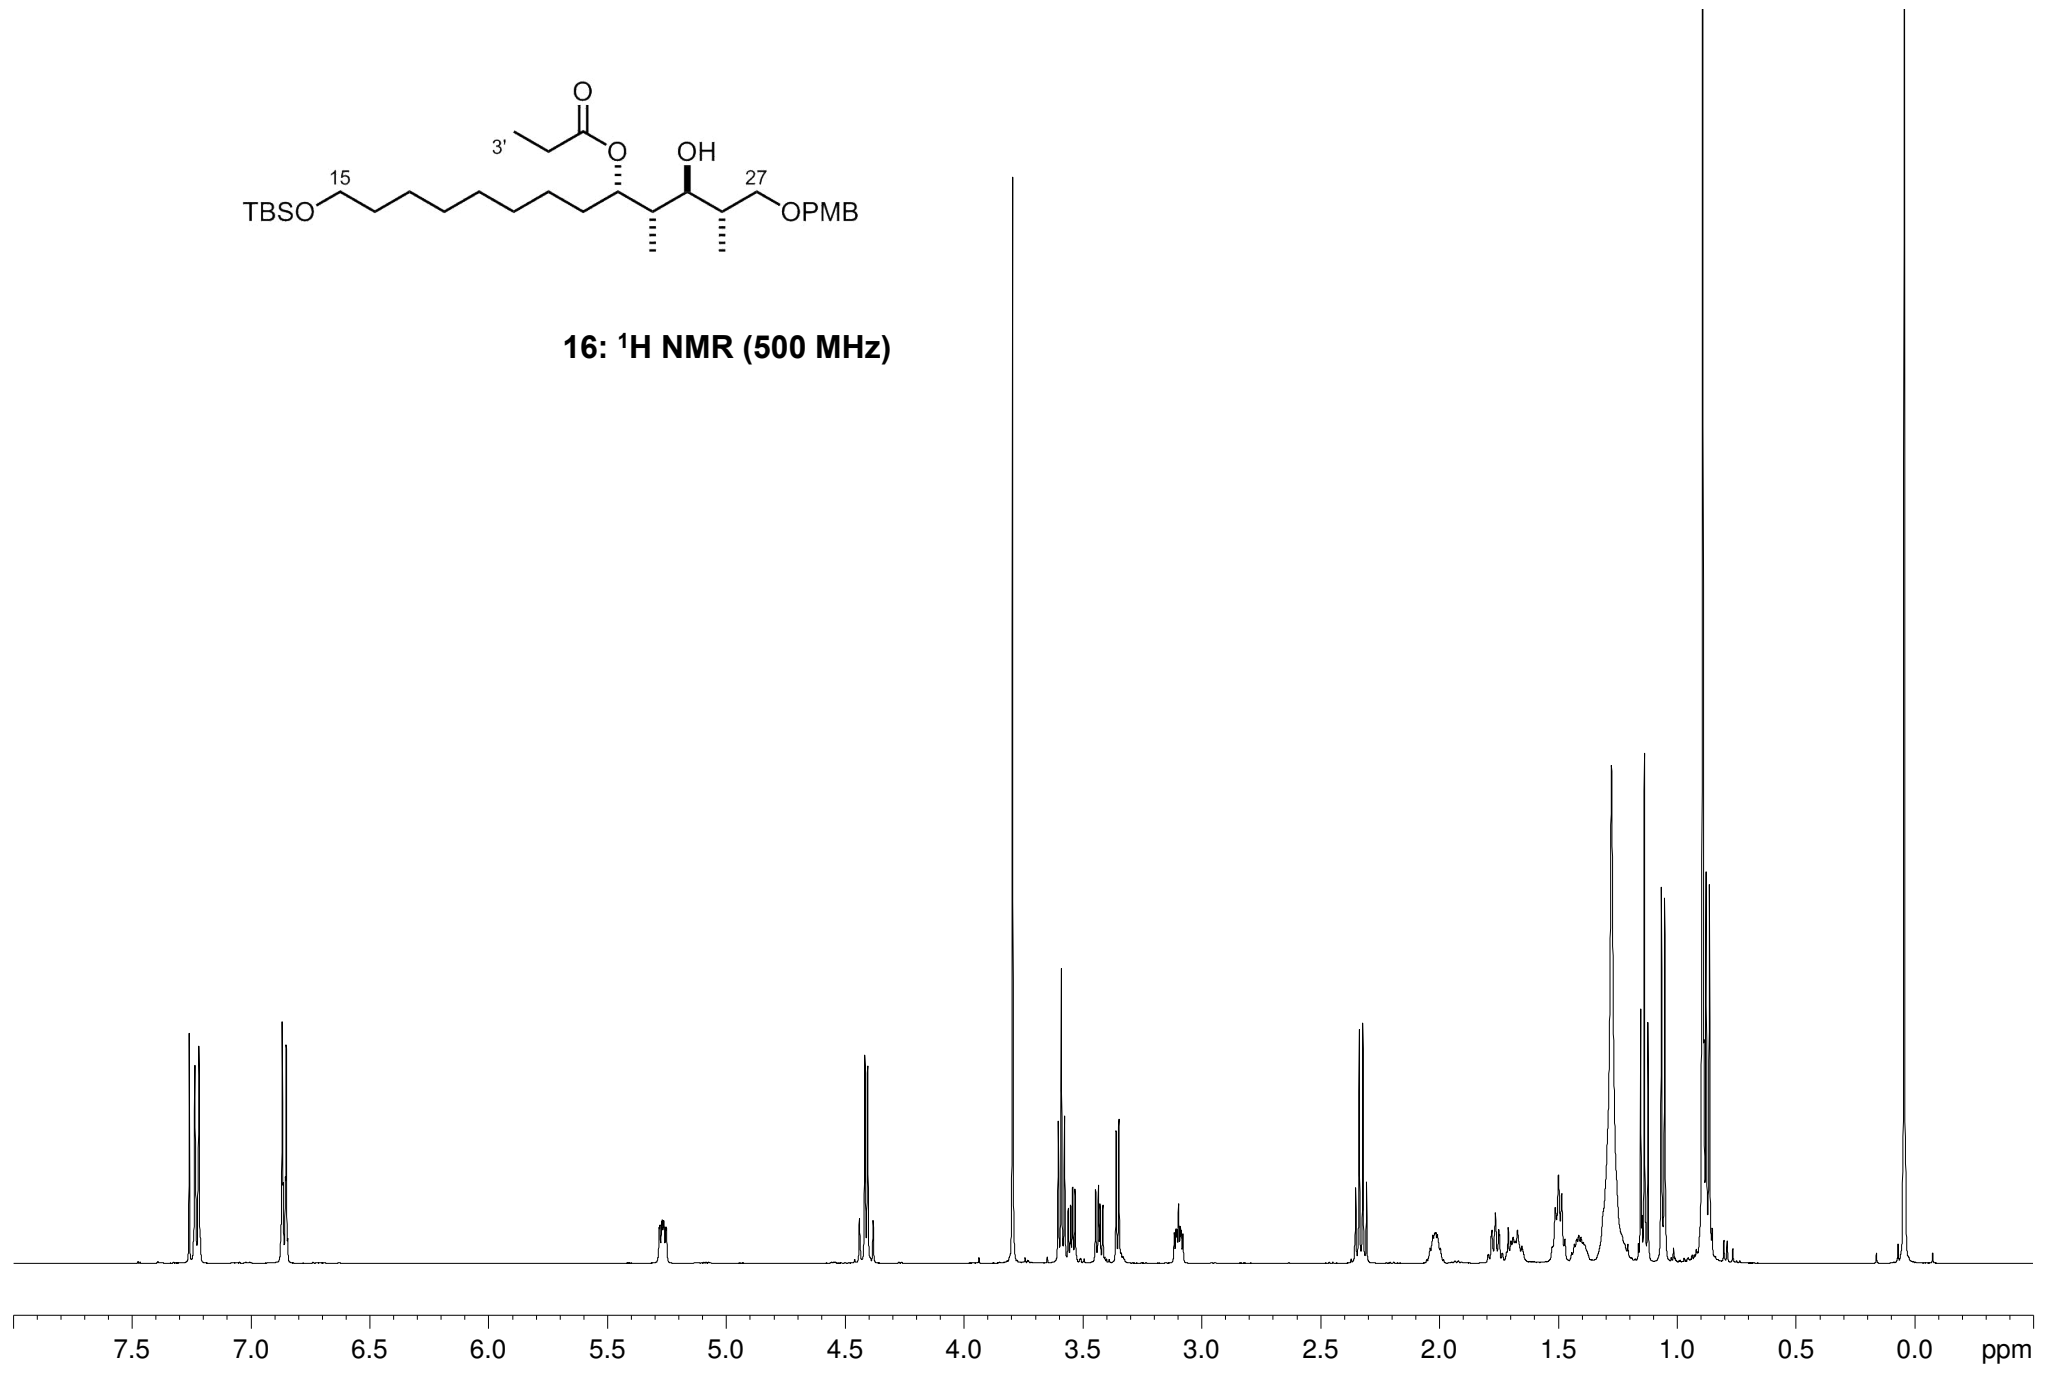

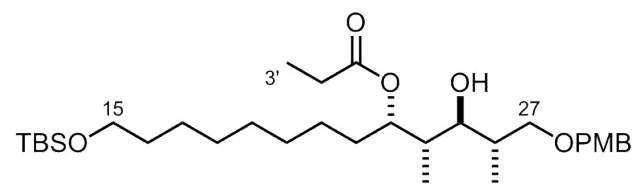

16:  $^{13}\text{C}$  NMR (125 MHz)

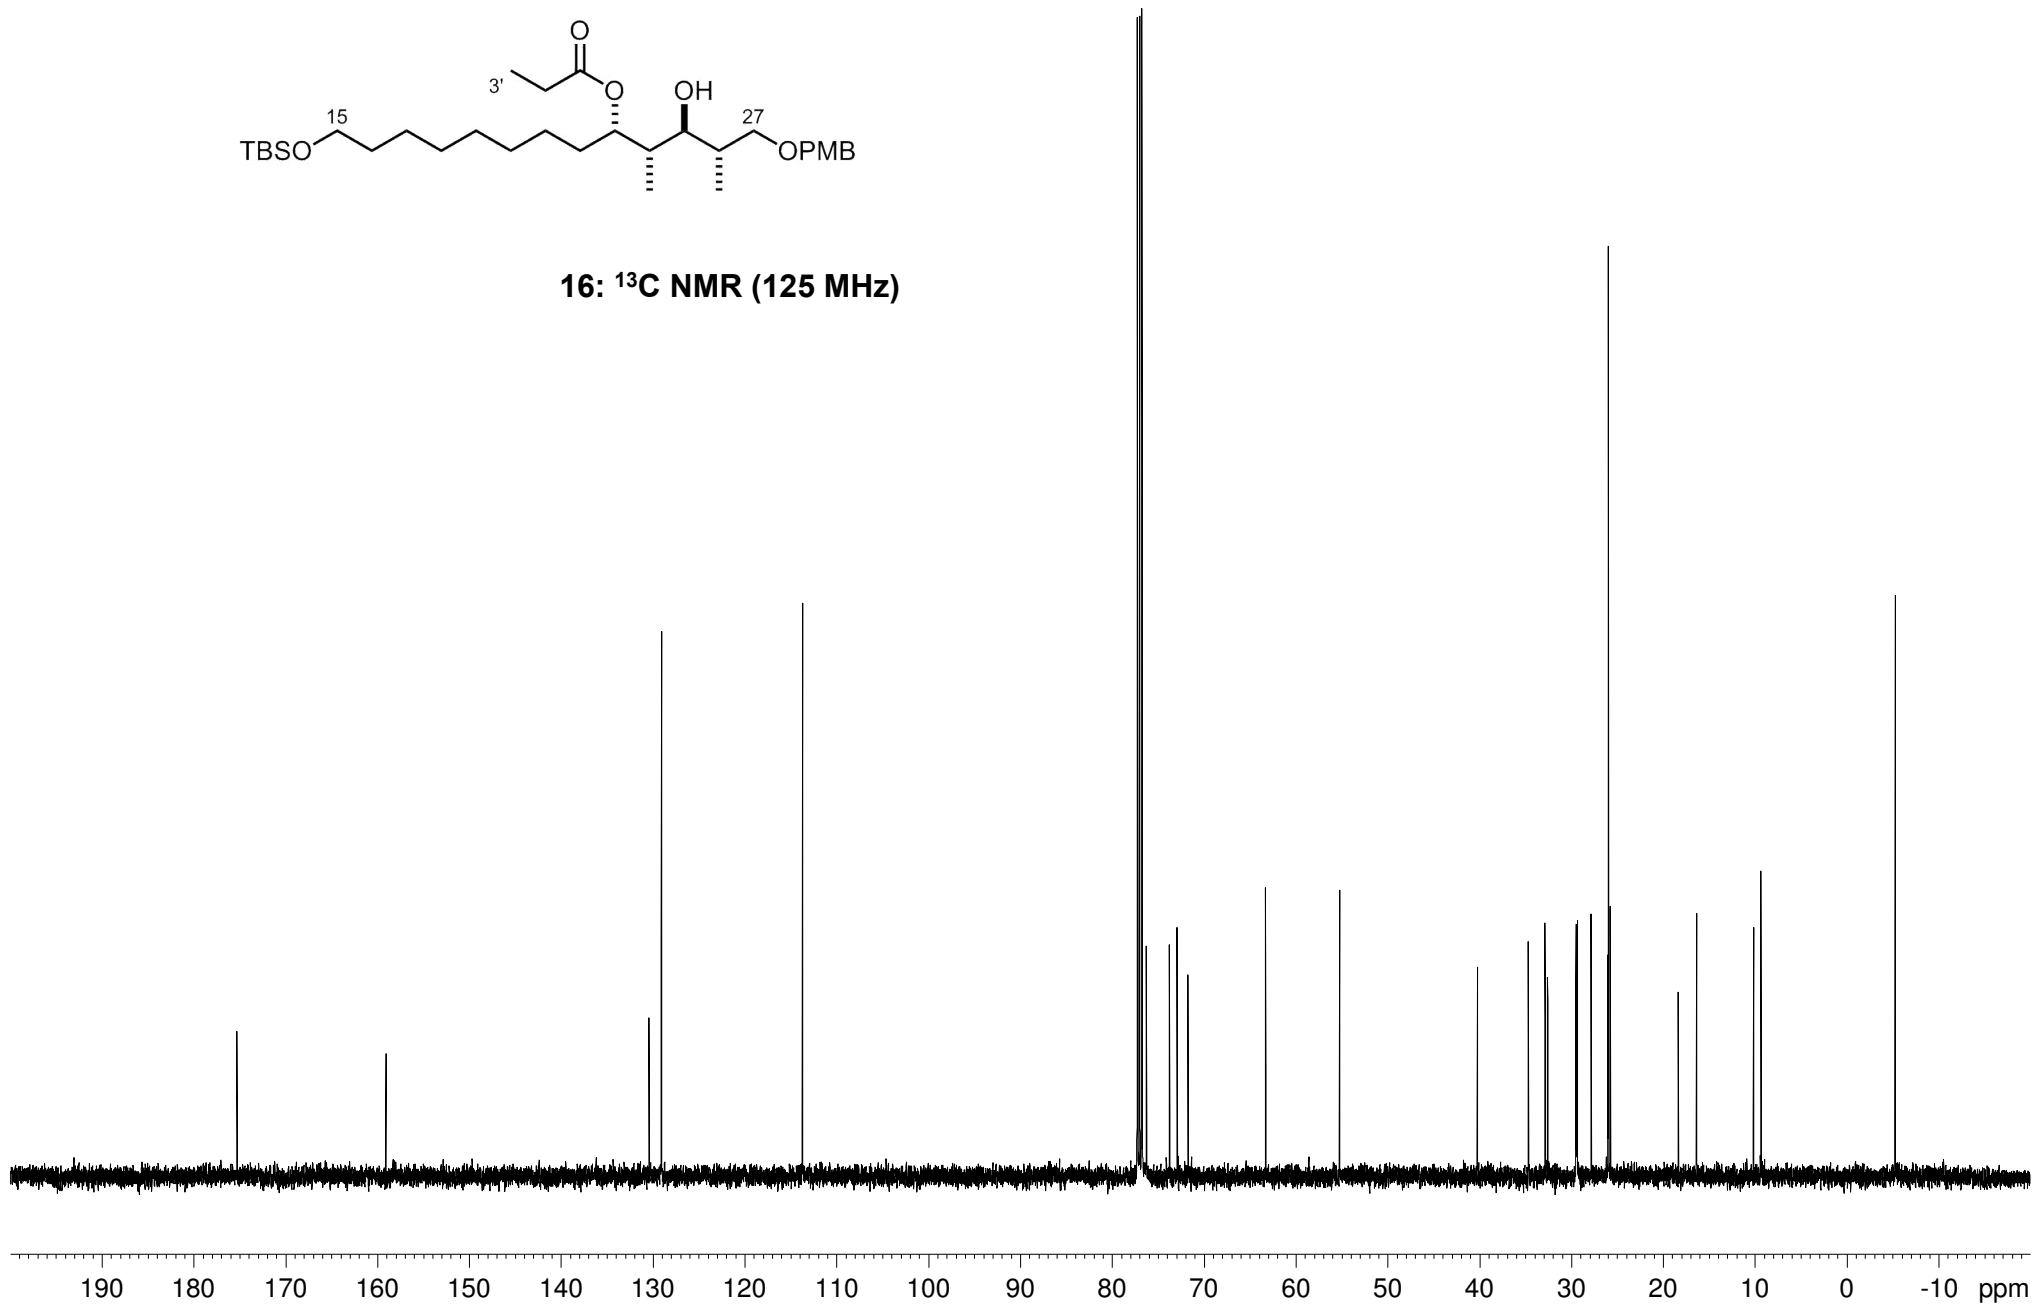

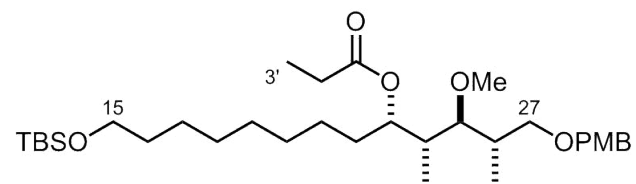

16a:  $^1\text{H}$  NMR (500 MHz)

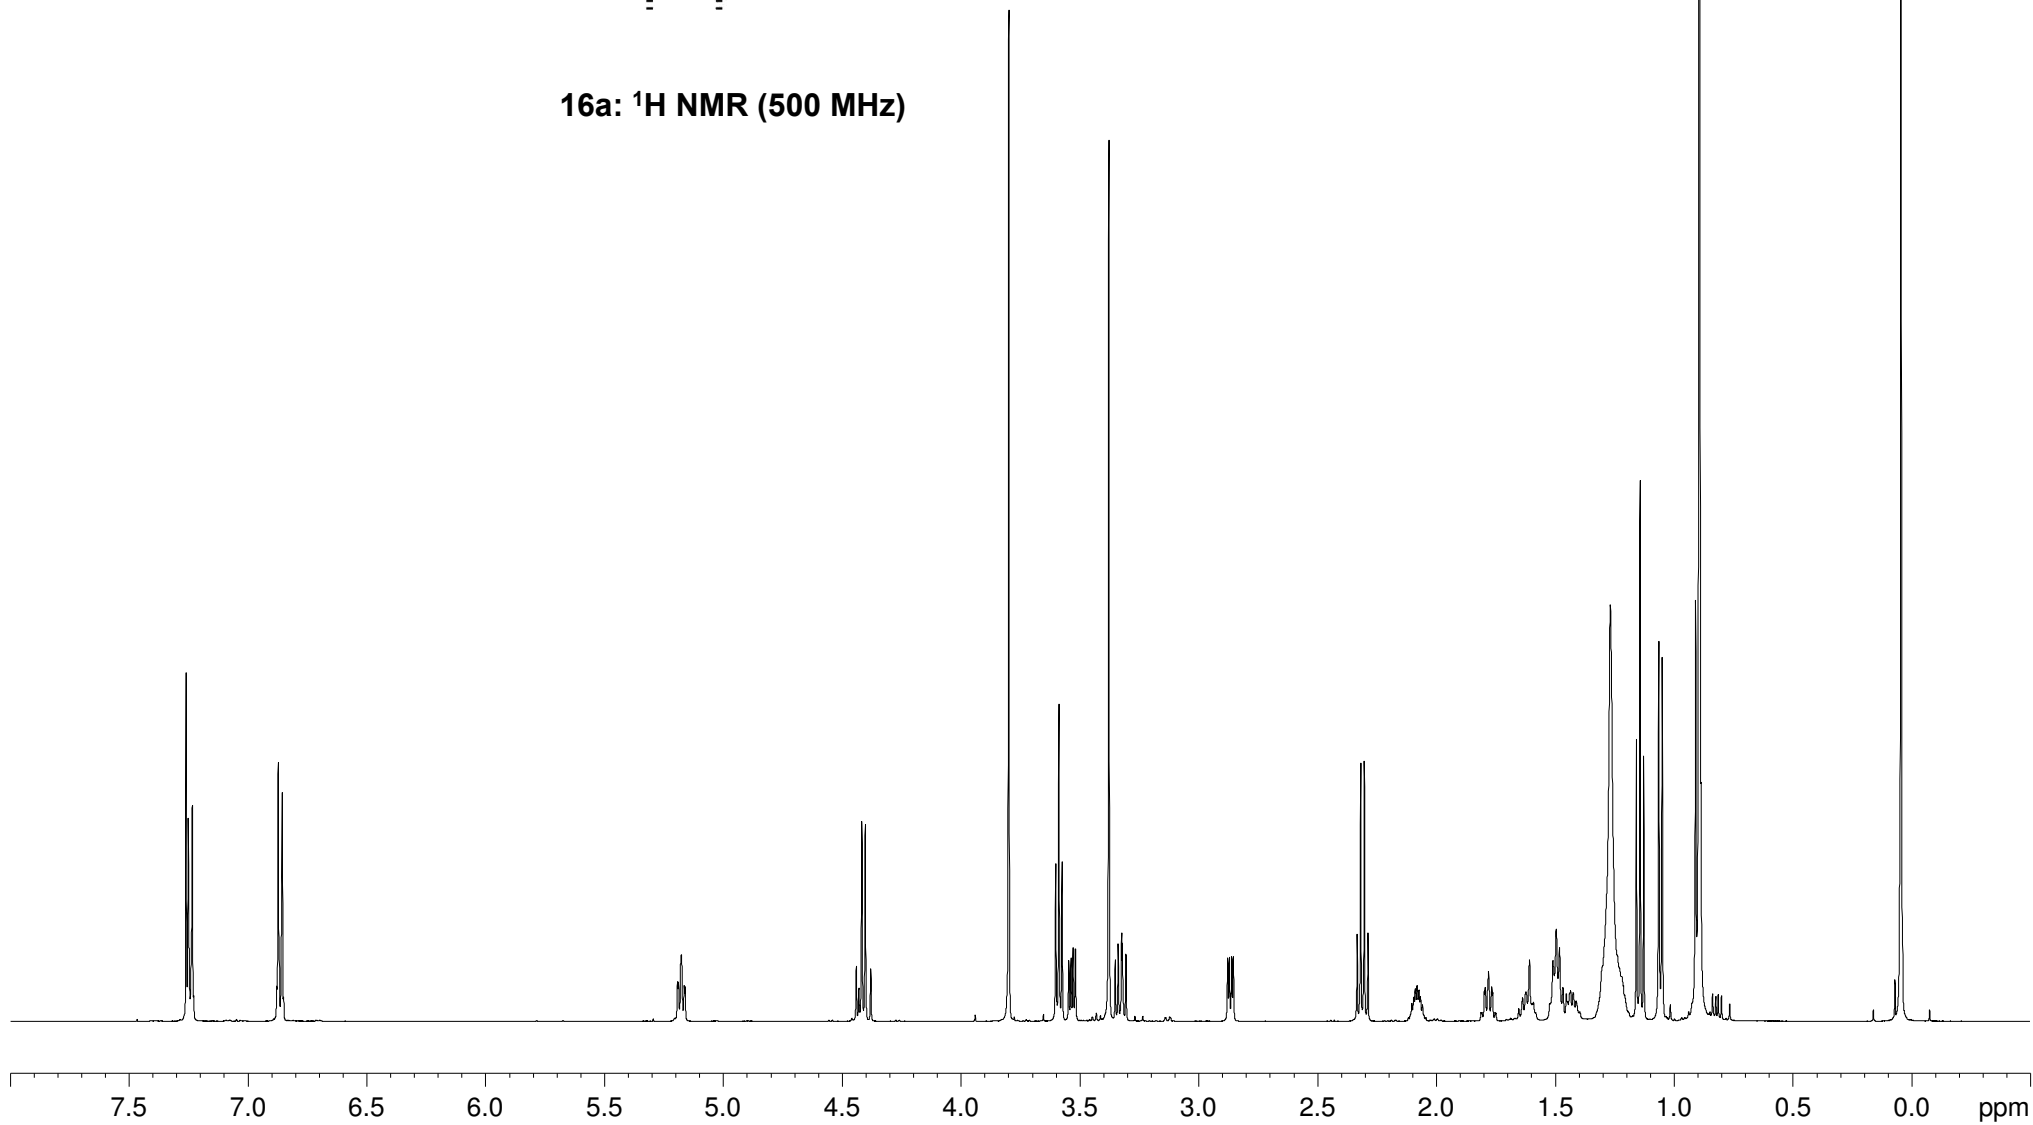

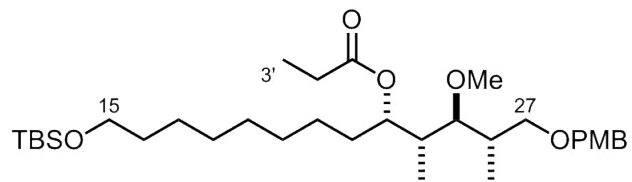

16a:  $^{13}\text{C}$  NMR (125 MHz)

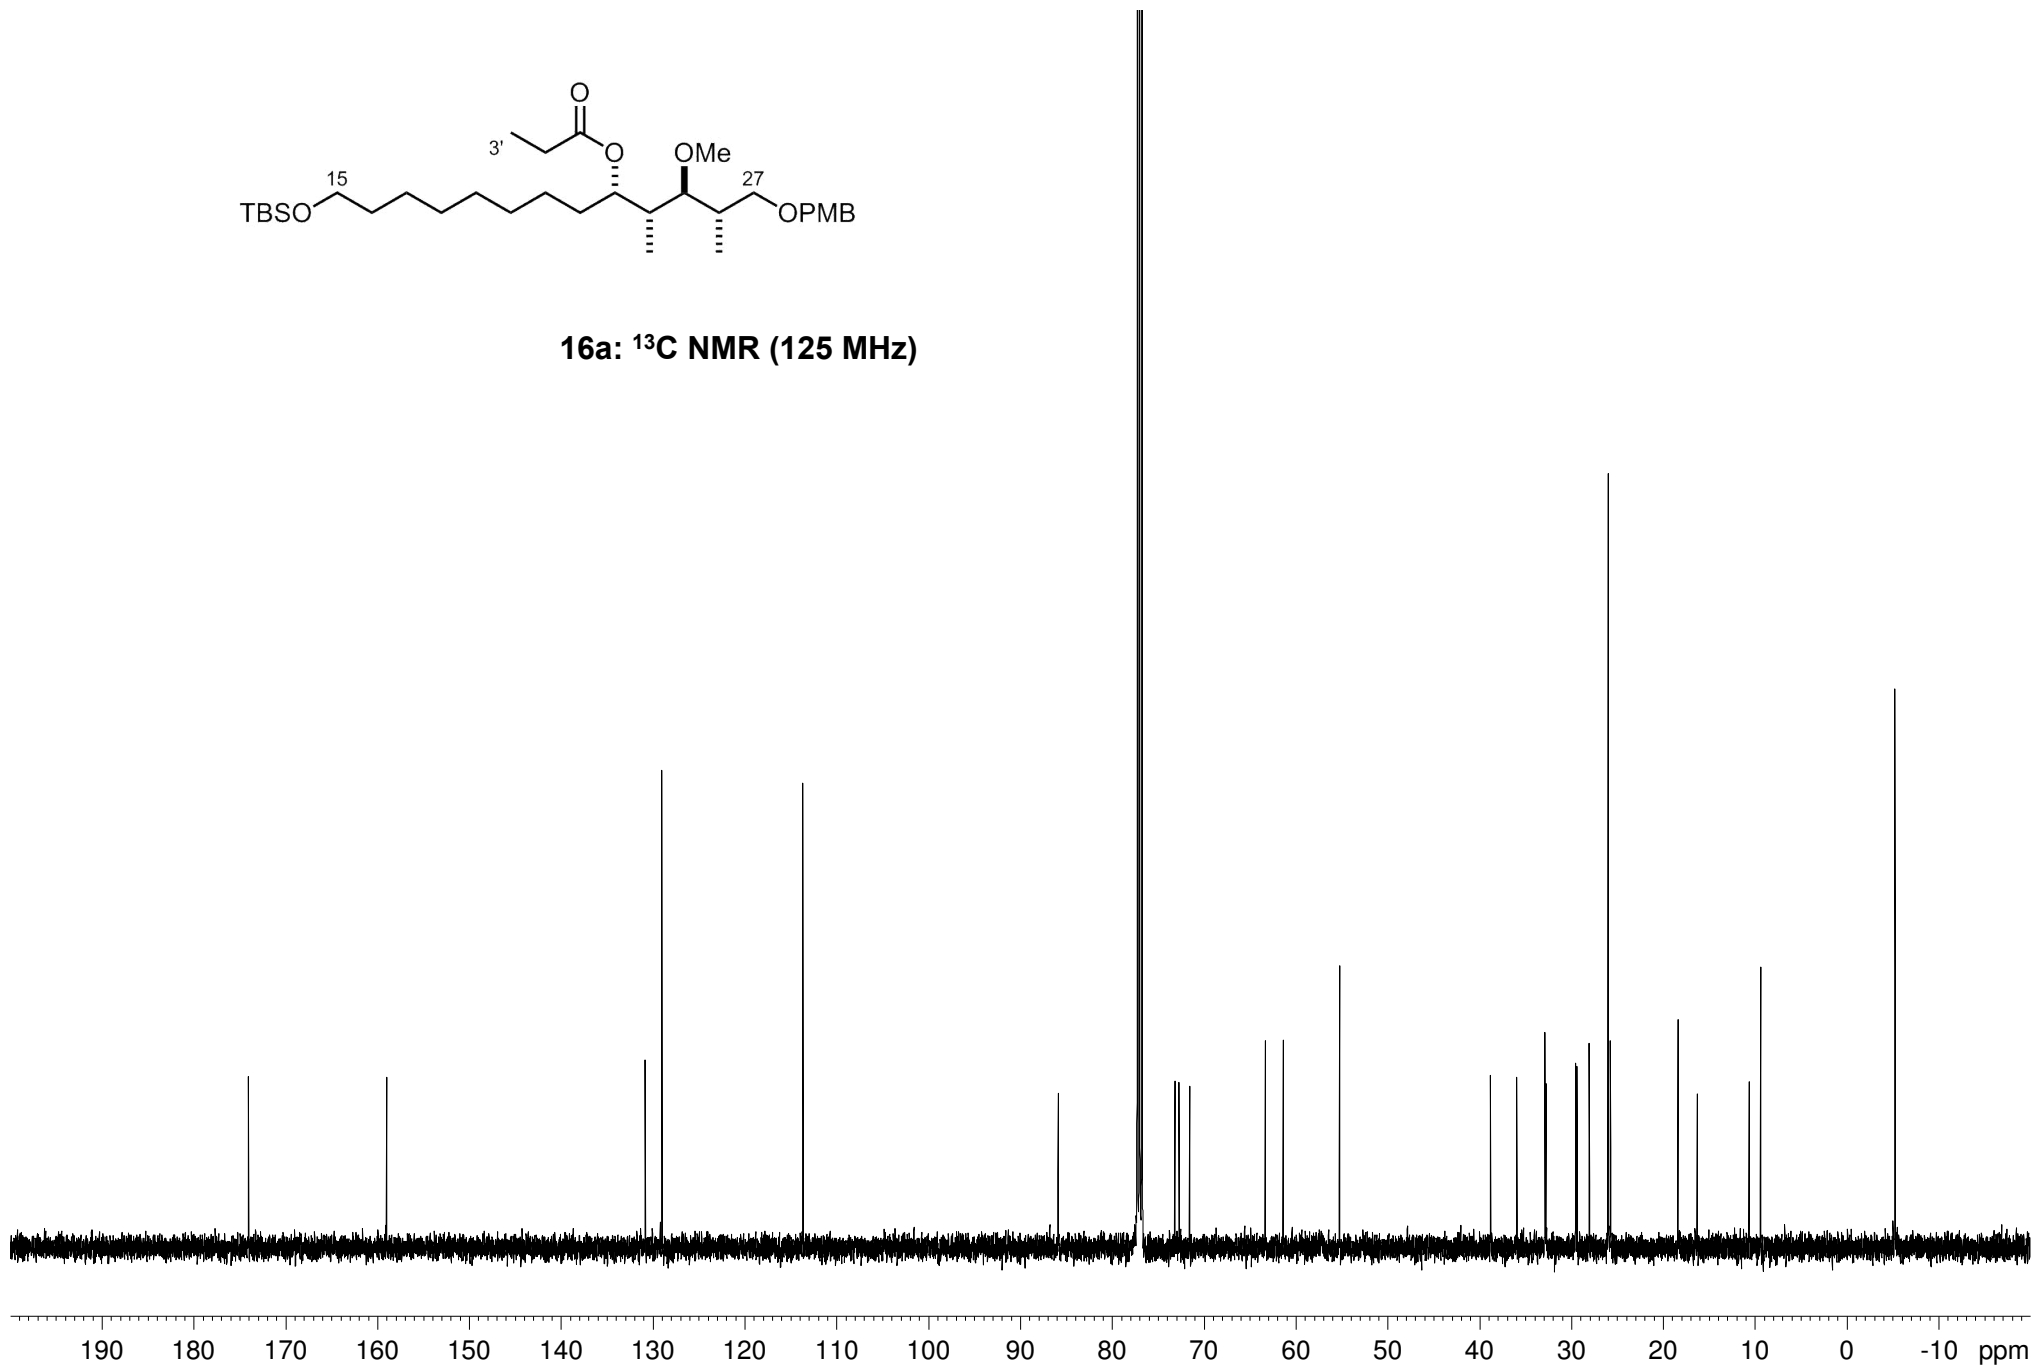

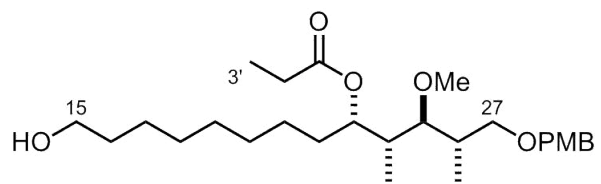

16b: <sup>1</sup>H NMR (500 MHz)

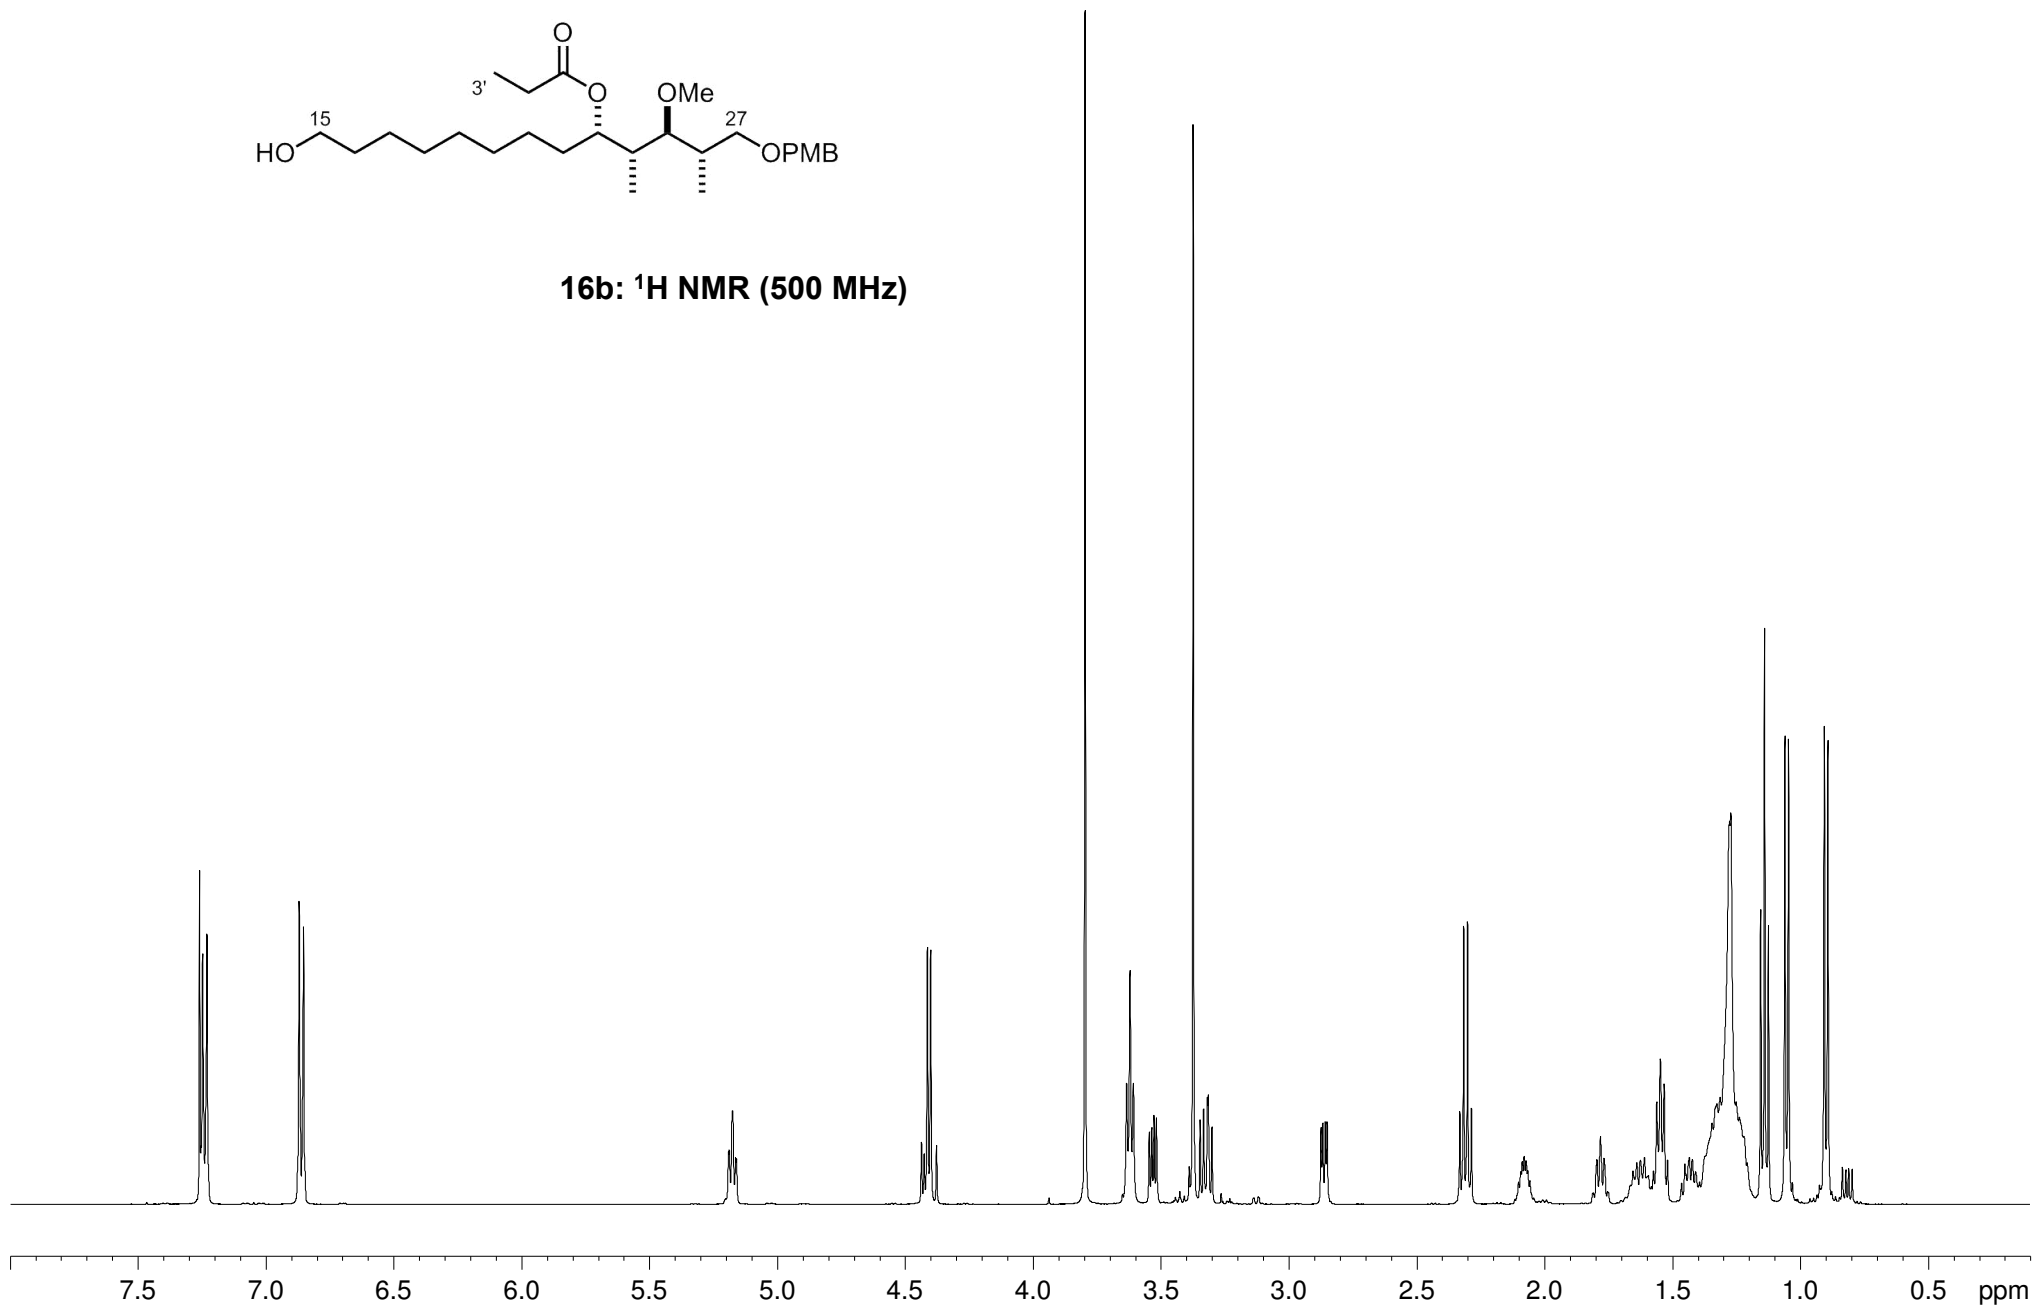





16b: <sup>13</sup>C NMR (125 MHz)

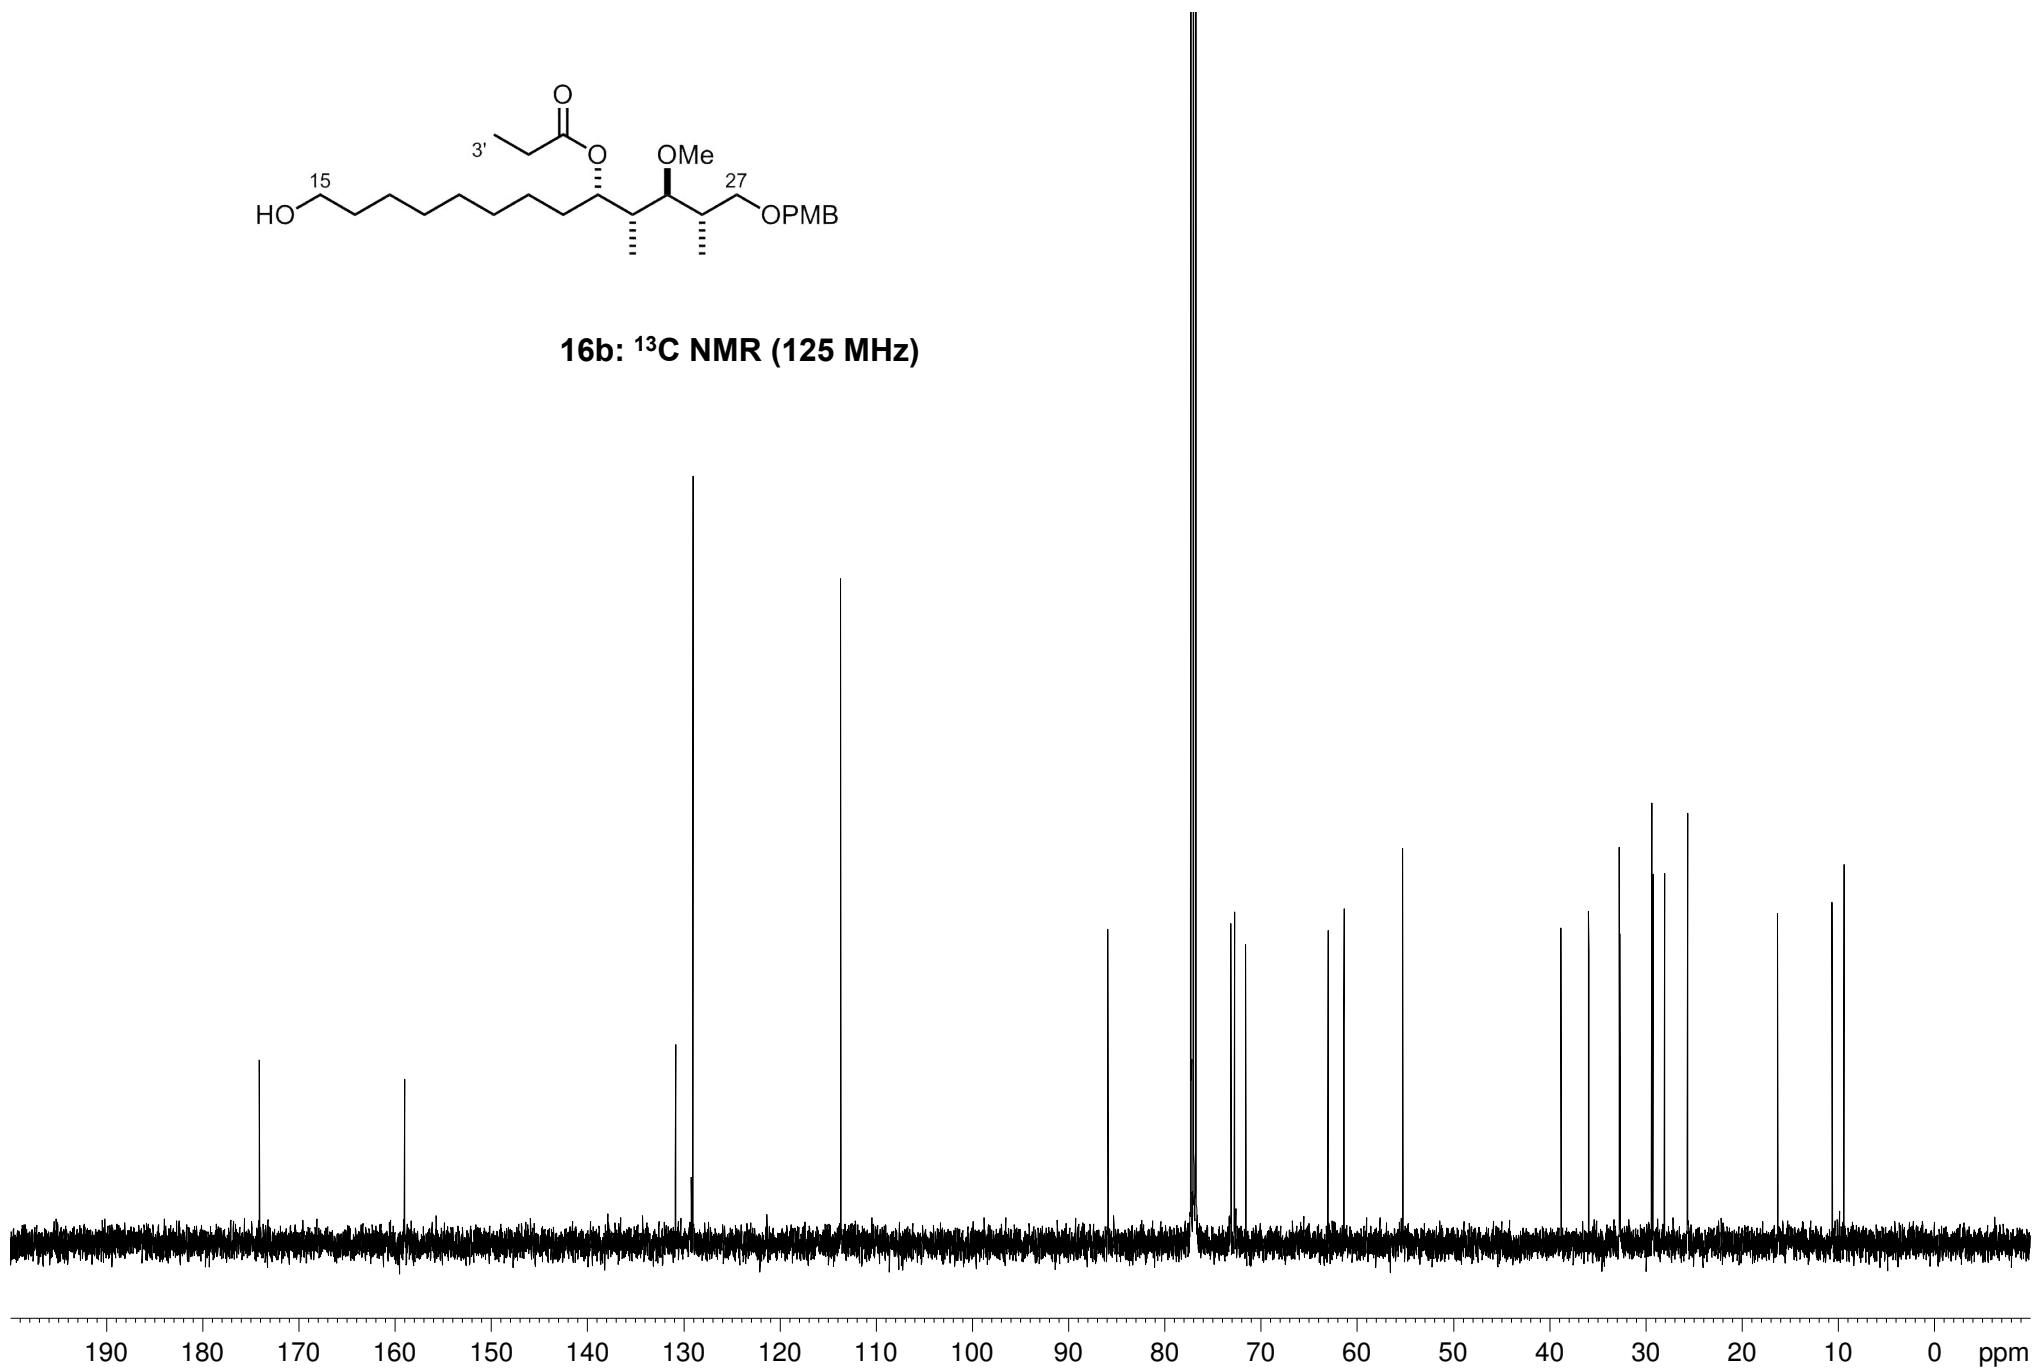

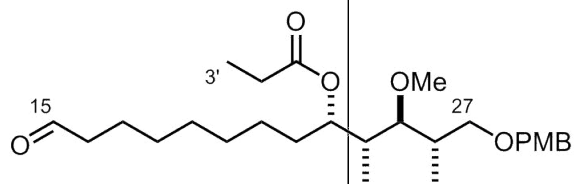

12: <sup>1</sup>H NMR (500 MHz)

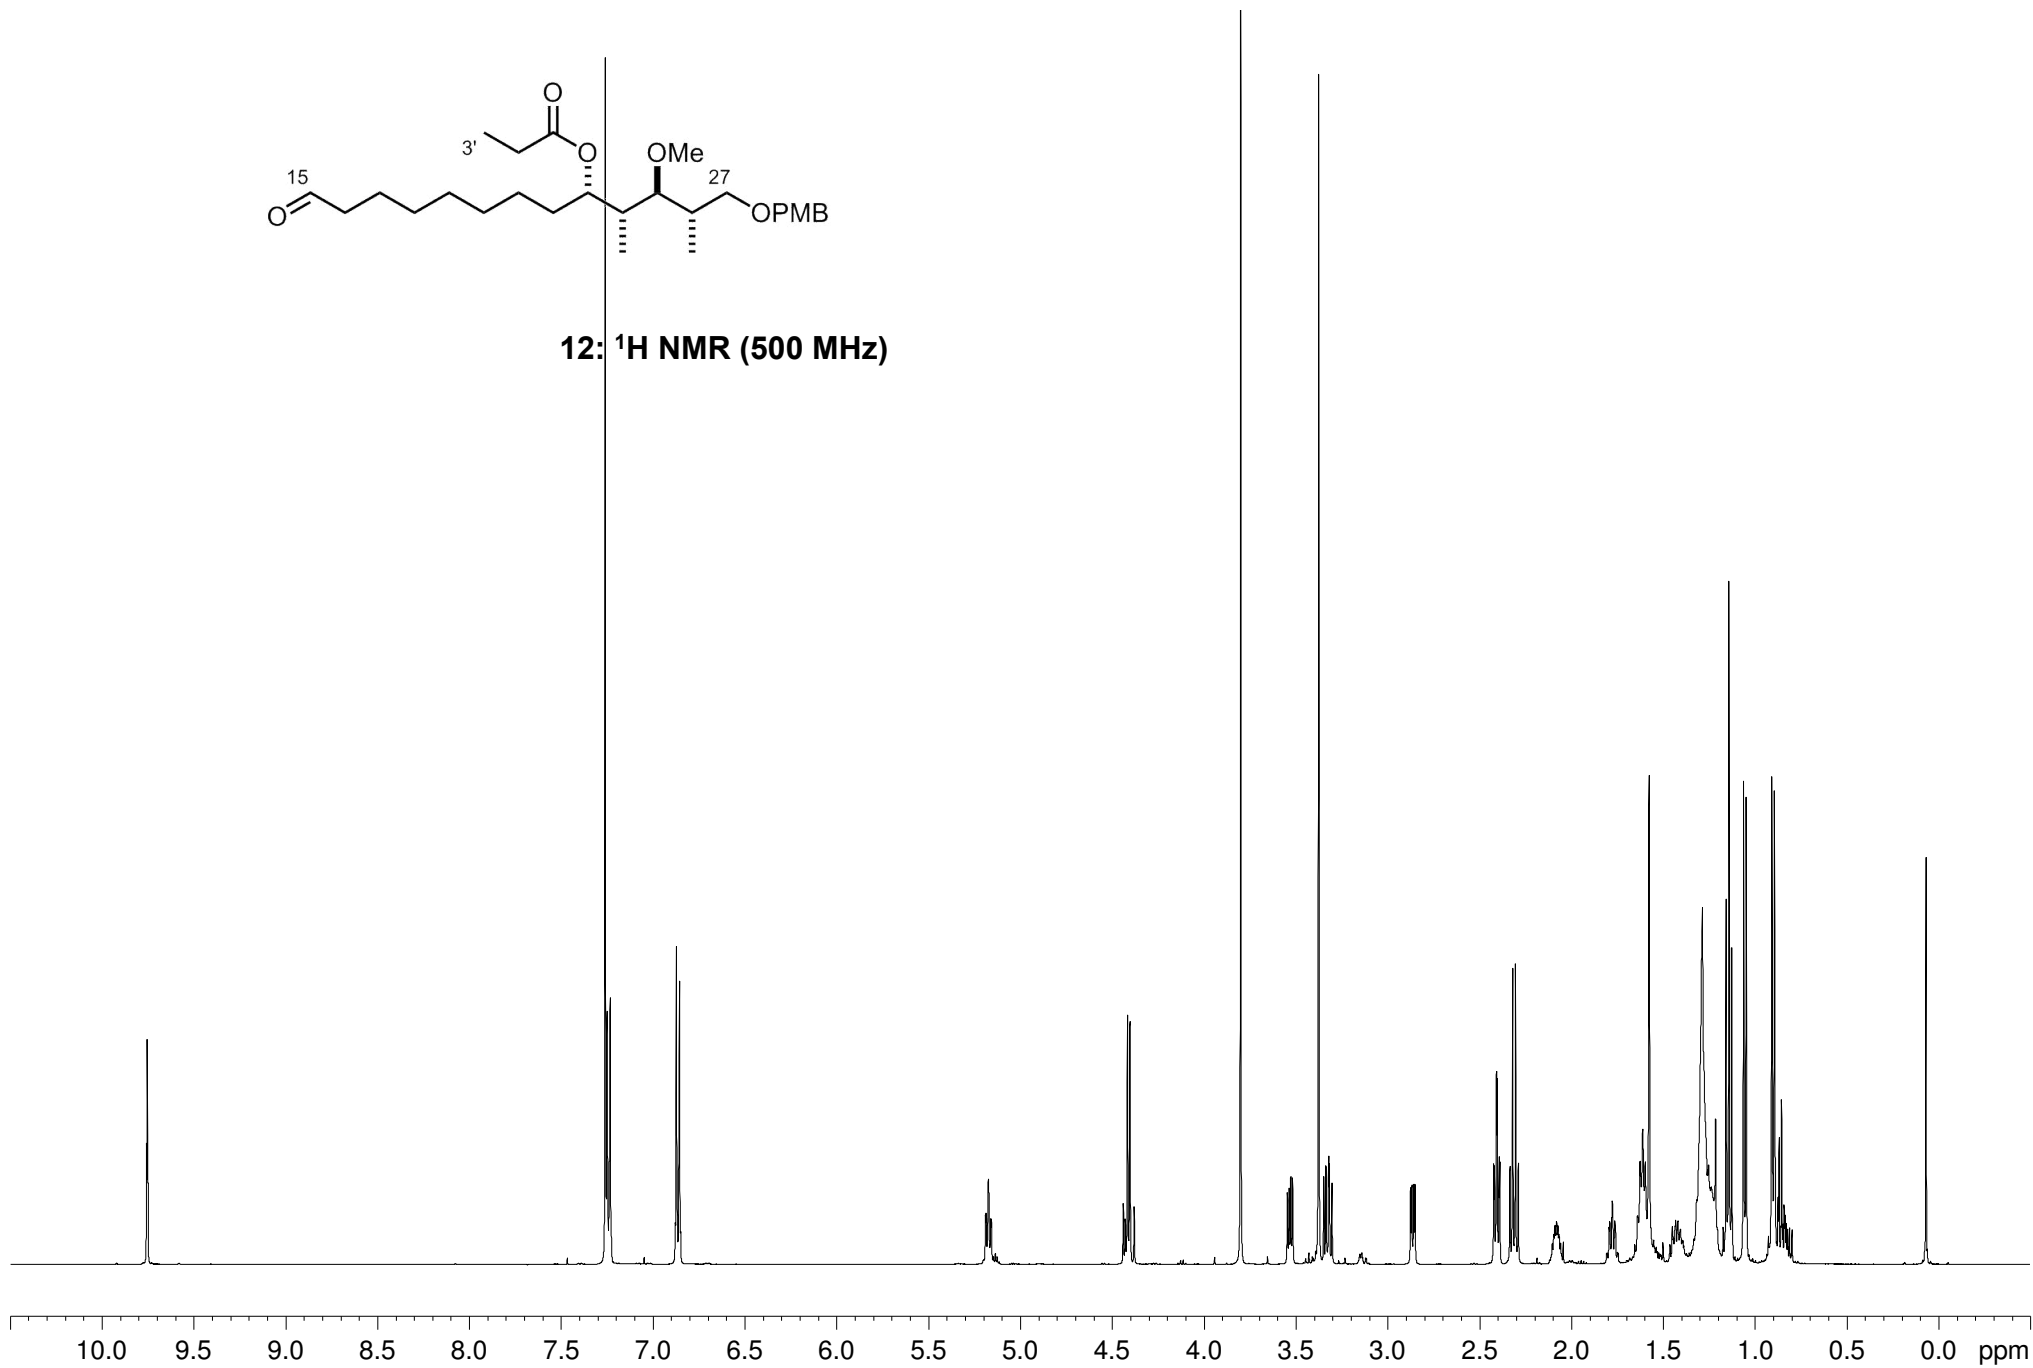

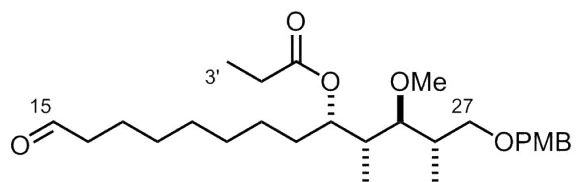

12:  $^{13}\text{C}$  NMR (125 MHz)

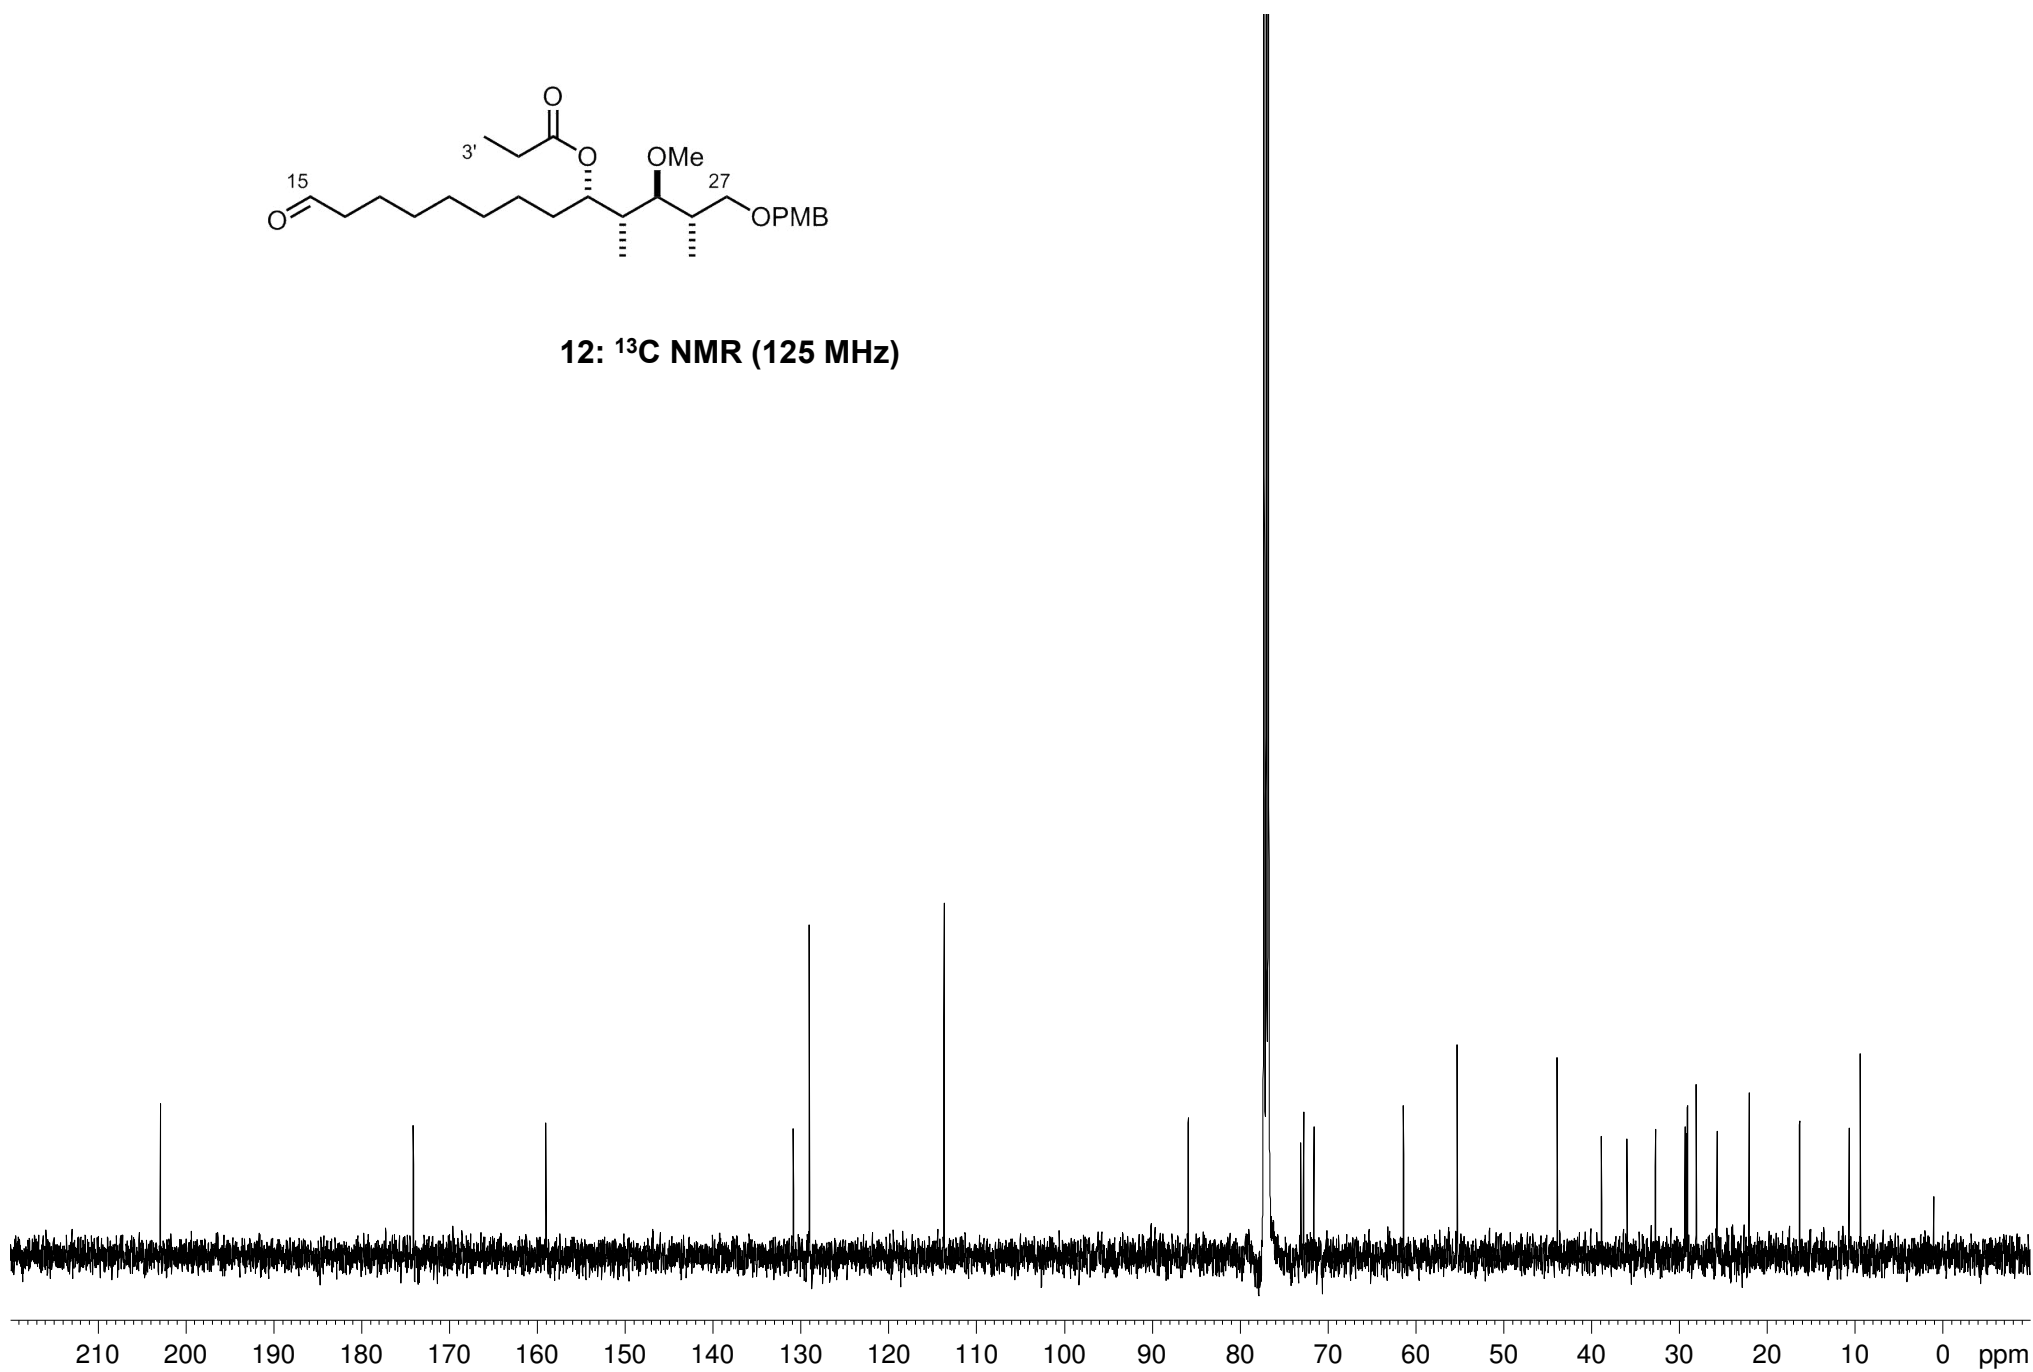

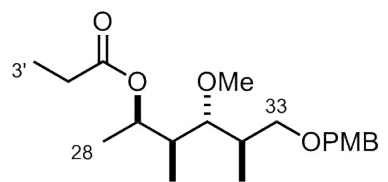

18a:  $^1\text{H}$  NMR (500 MHz)

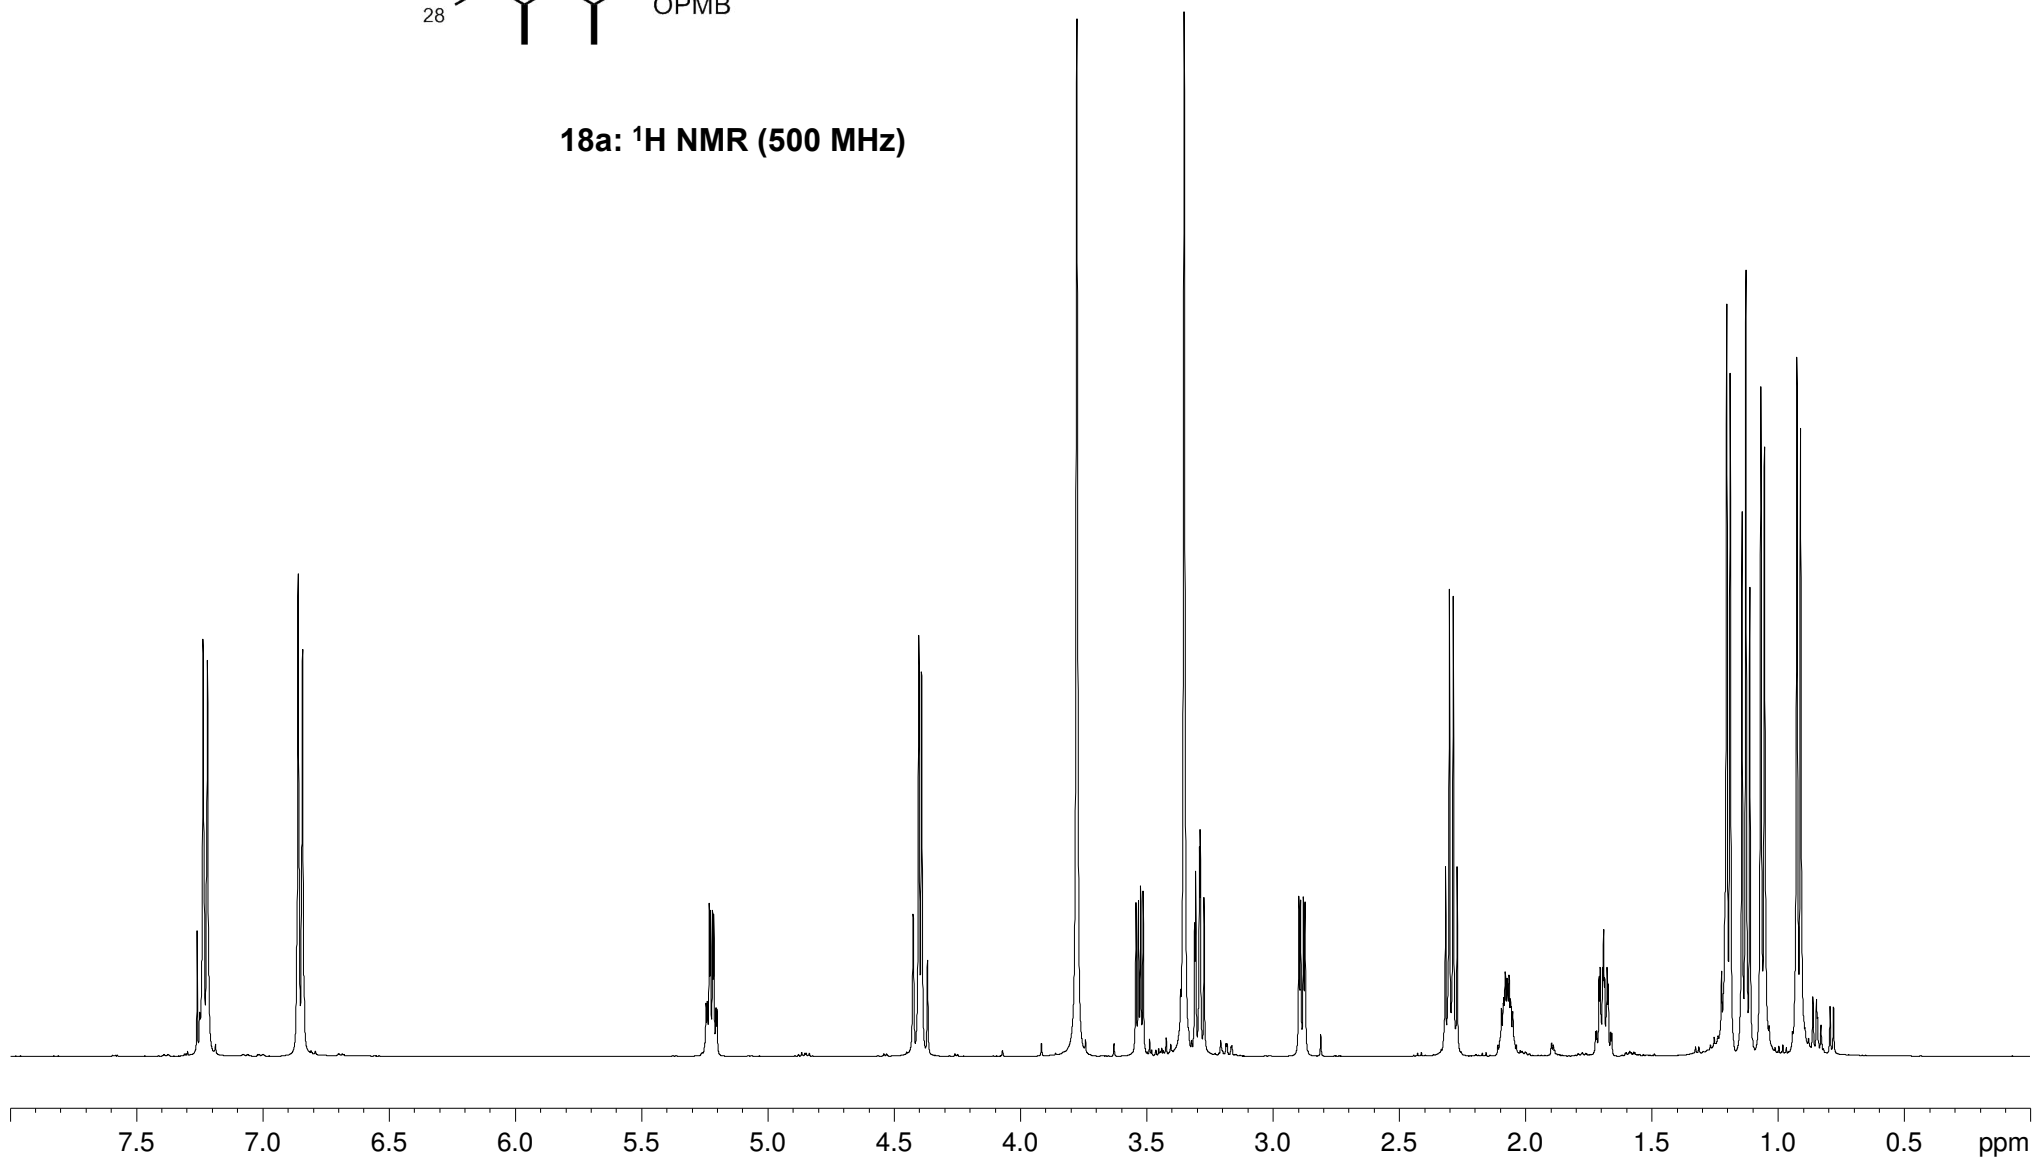

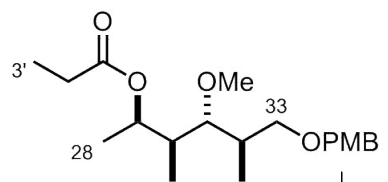

18a:  $^{13}\text{C}$  NMR (125 MHz)

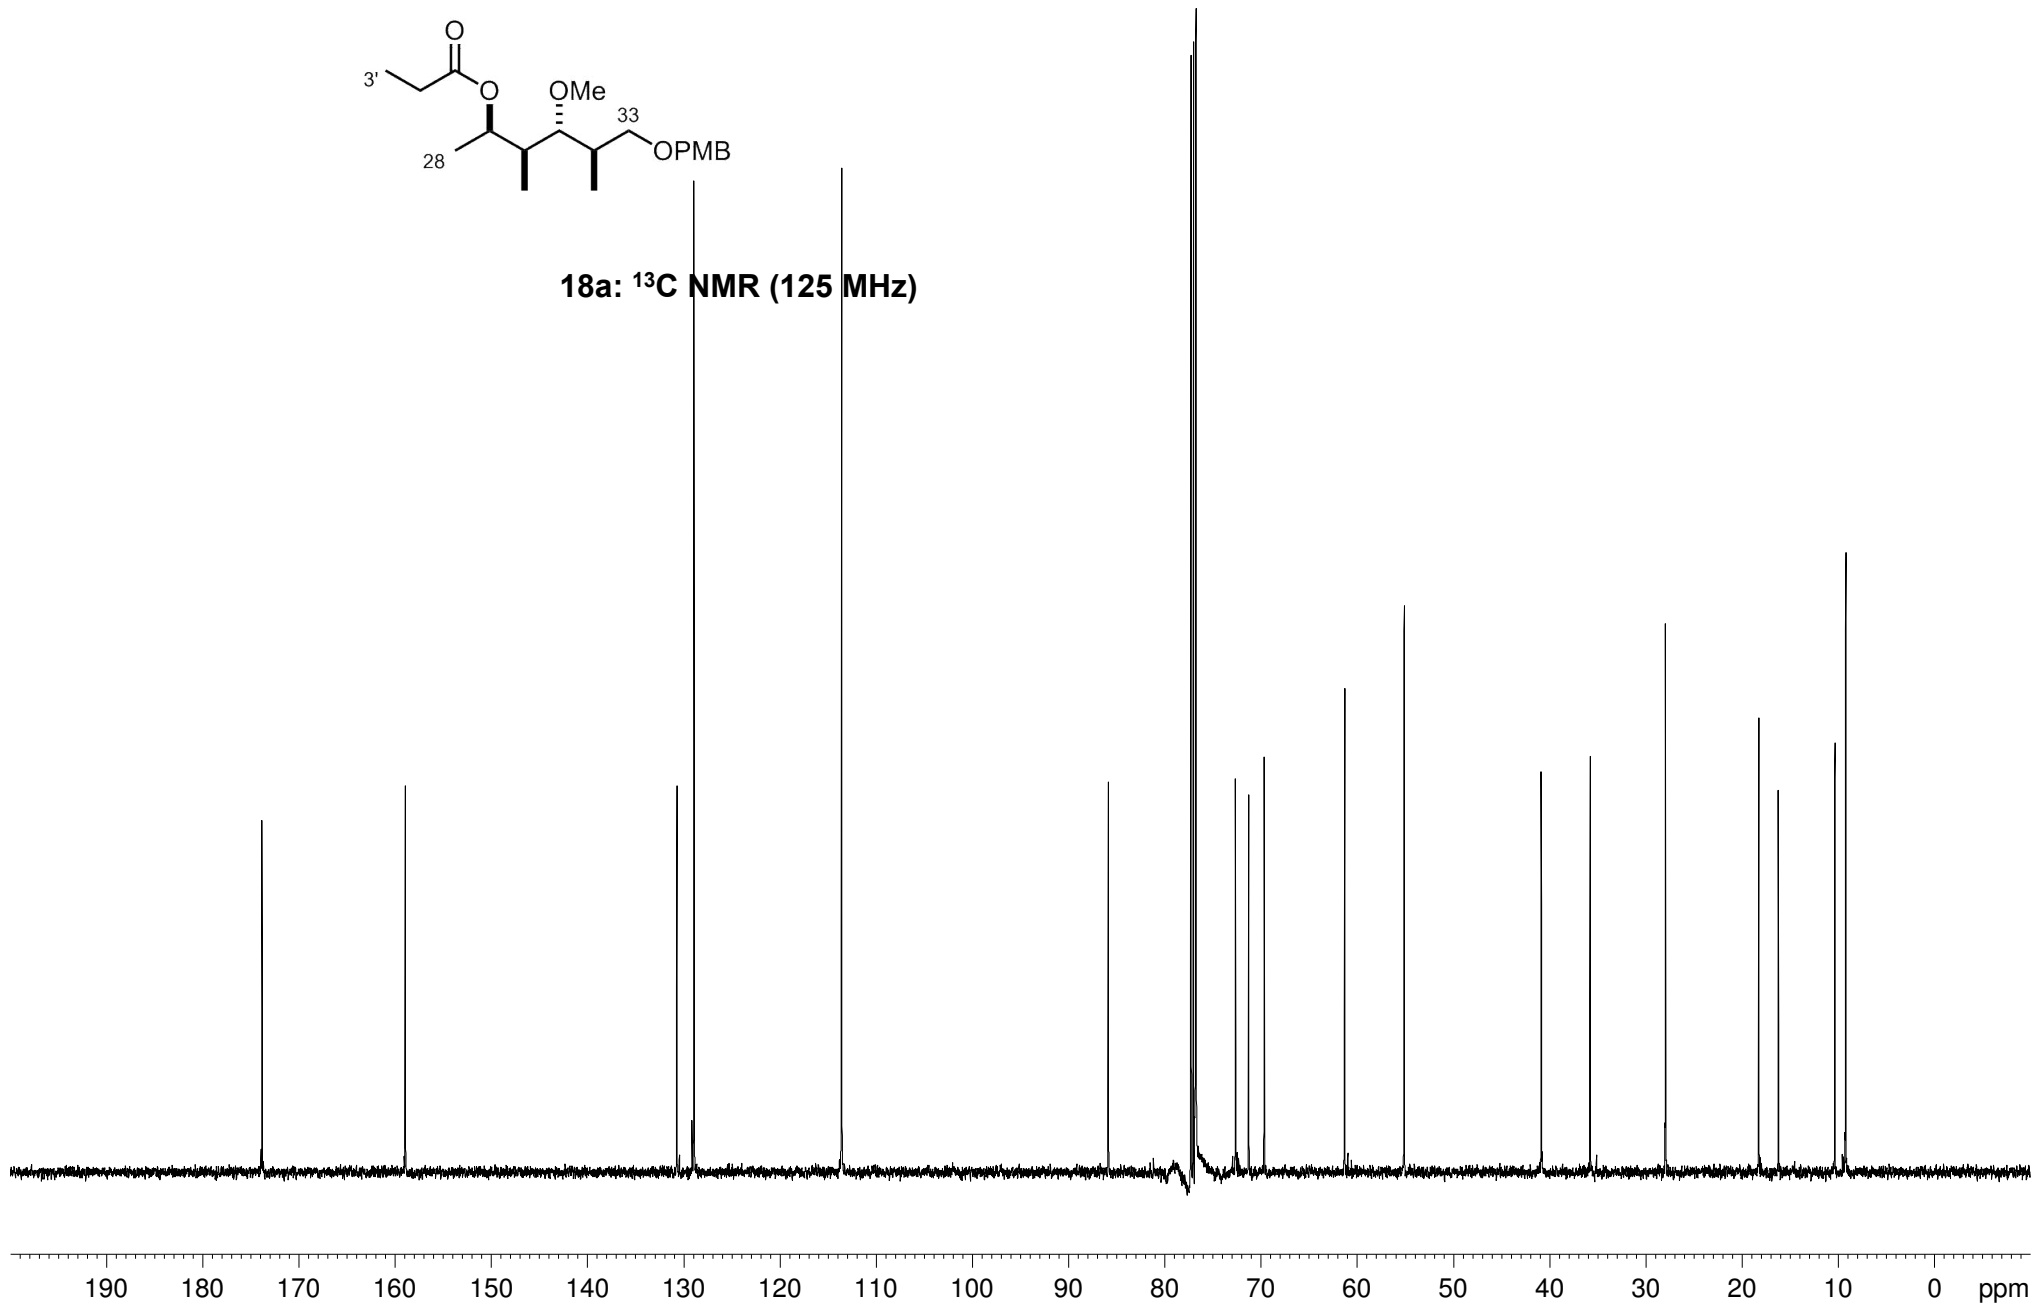

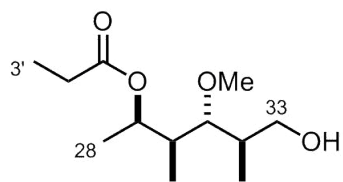

**18b: <sup>1</sup>H NMR (500 MHz)**

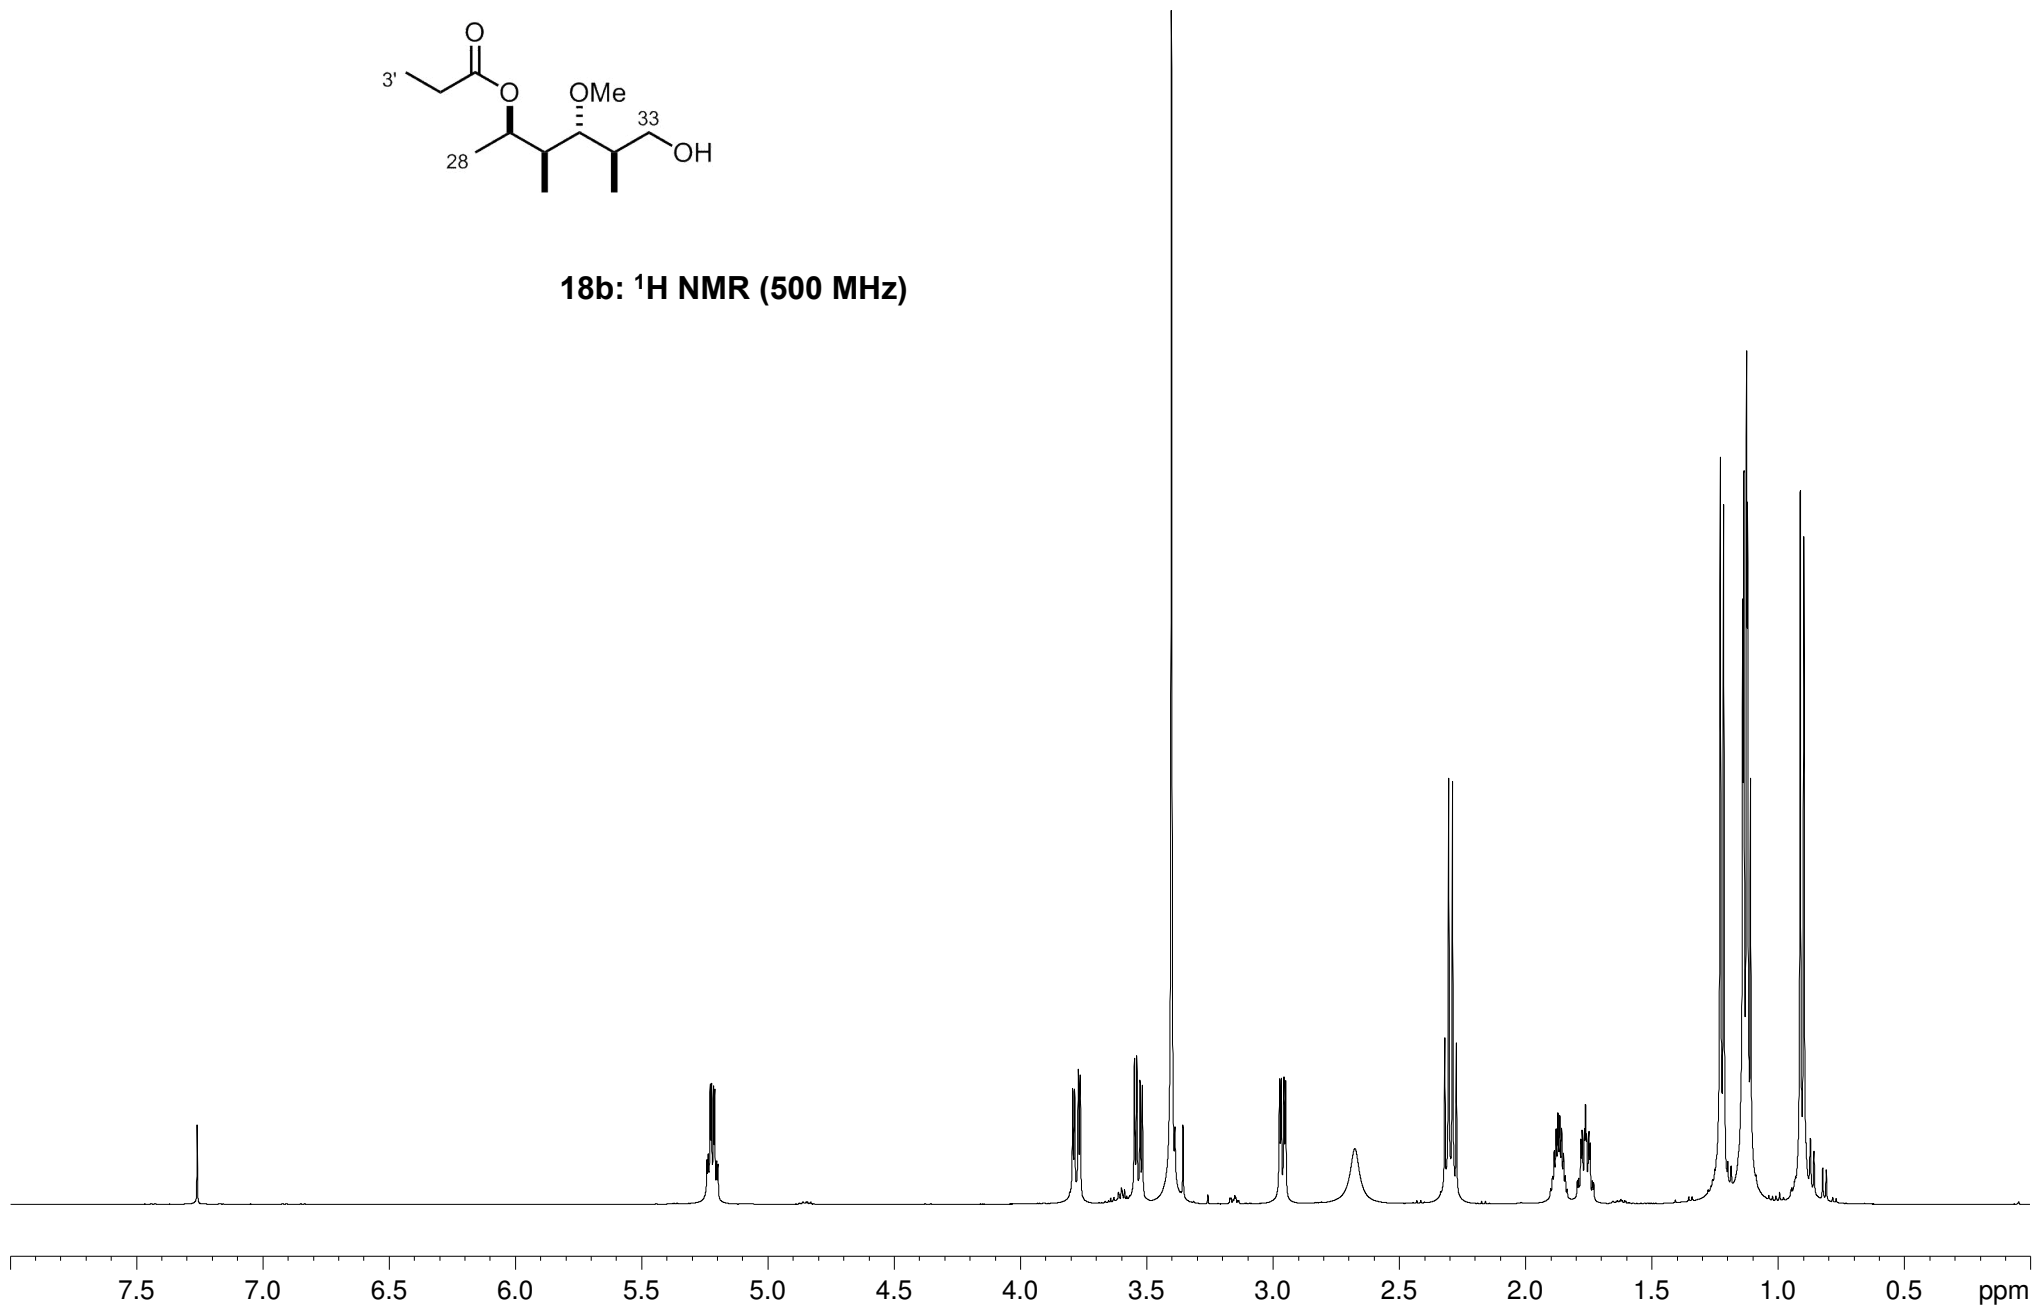

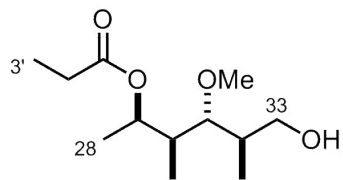

18b:  $^{13}\text{C}$  NMR (125 MHz)

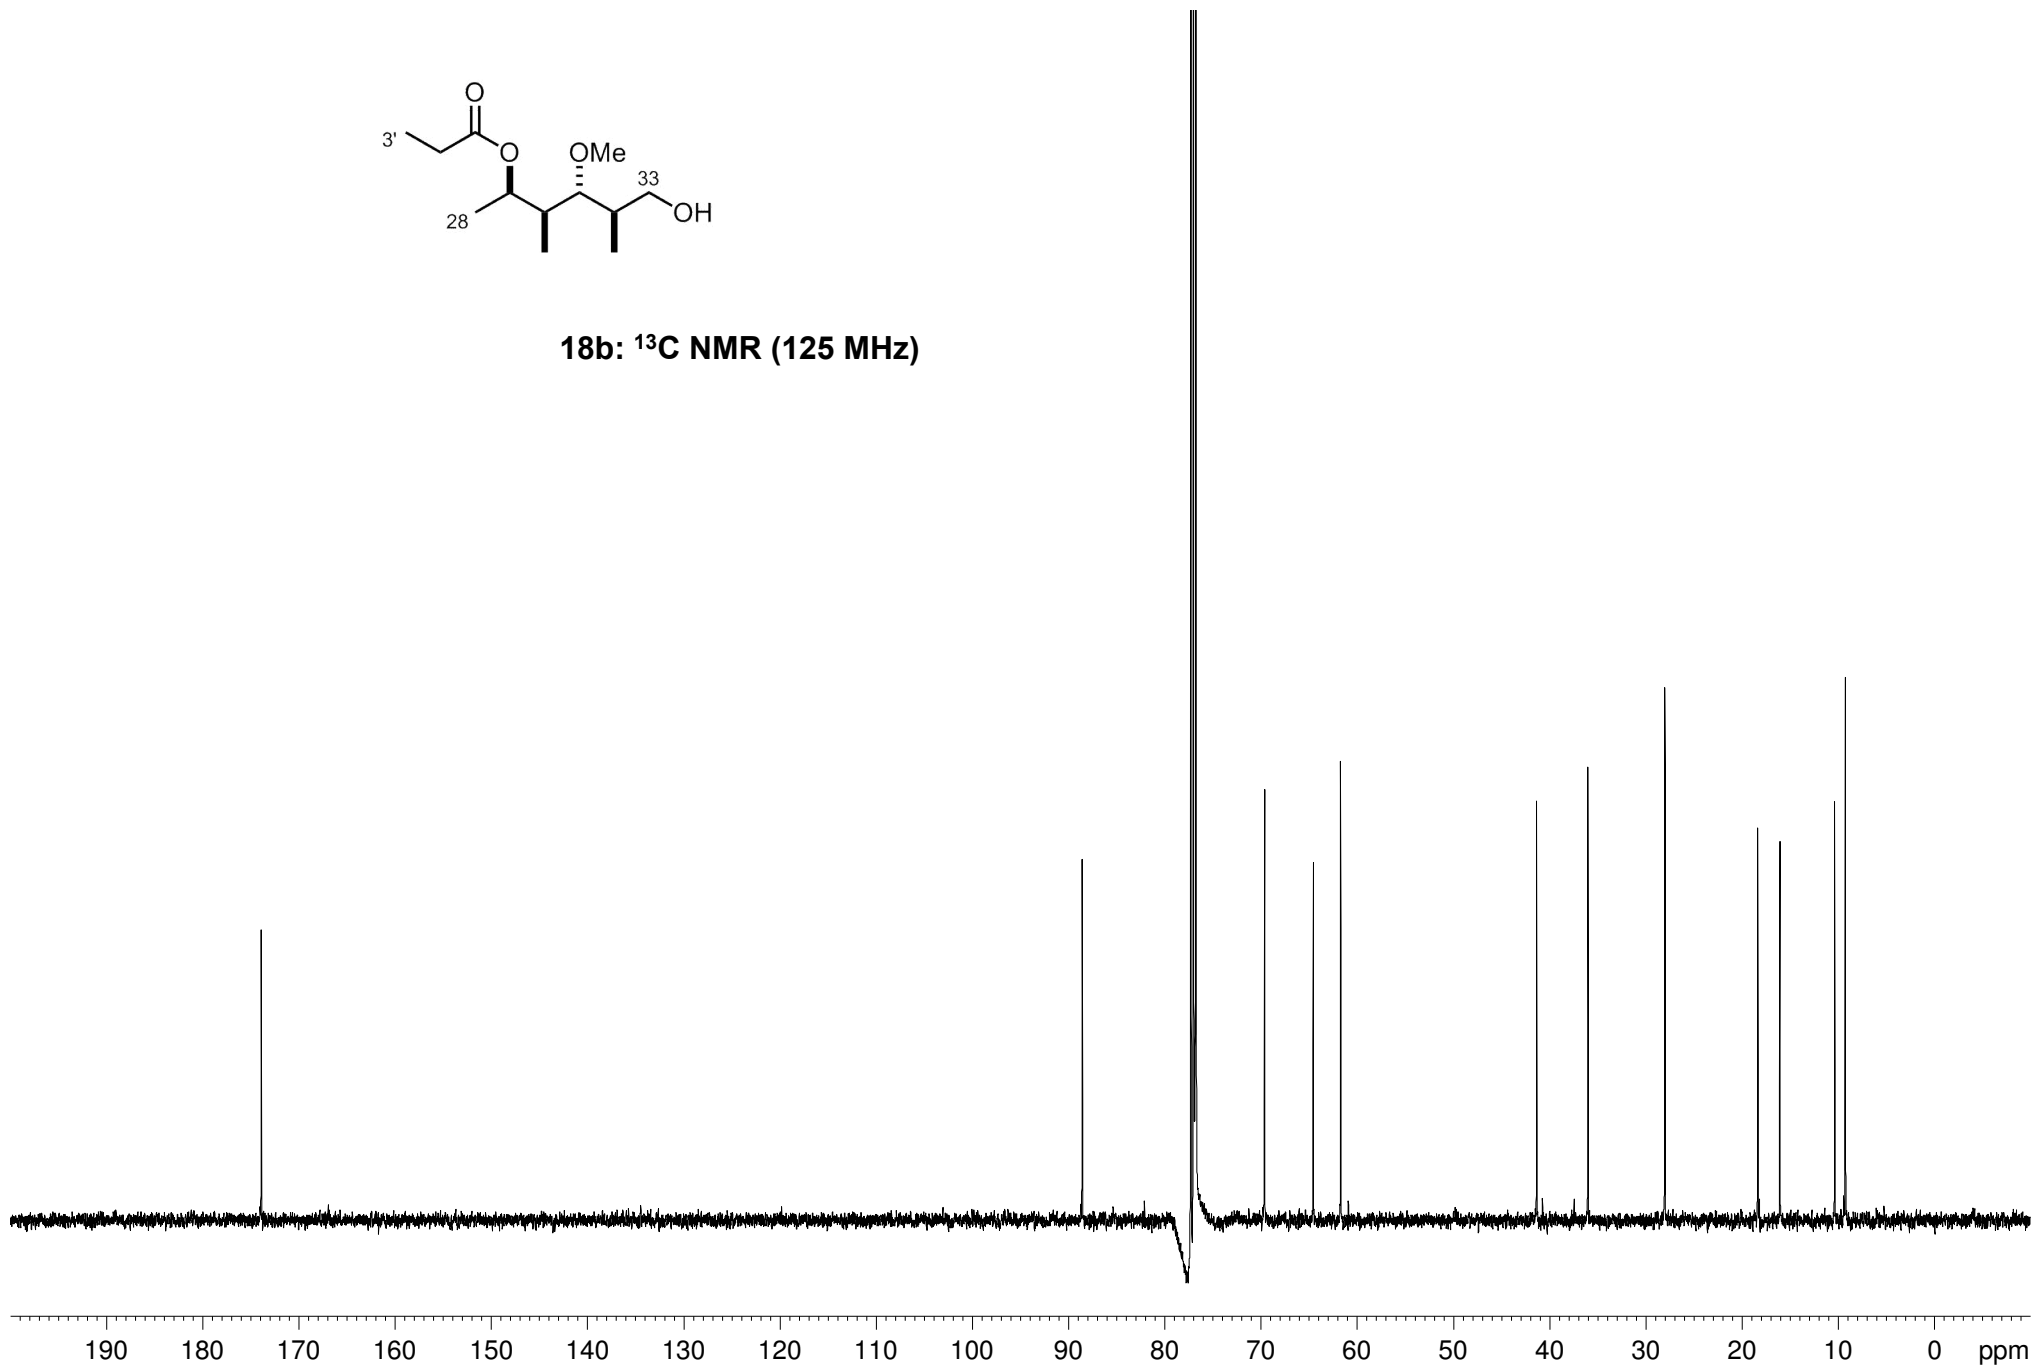

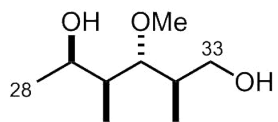

19: <sup>1</sup>H NMR (500 MHz)

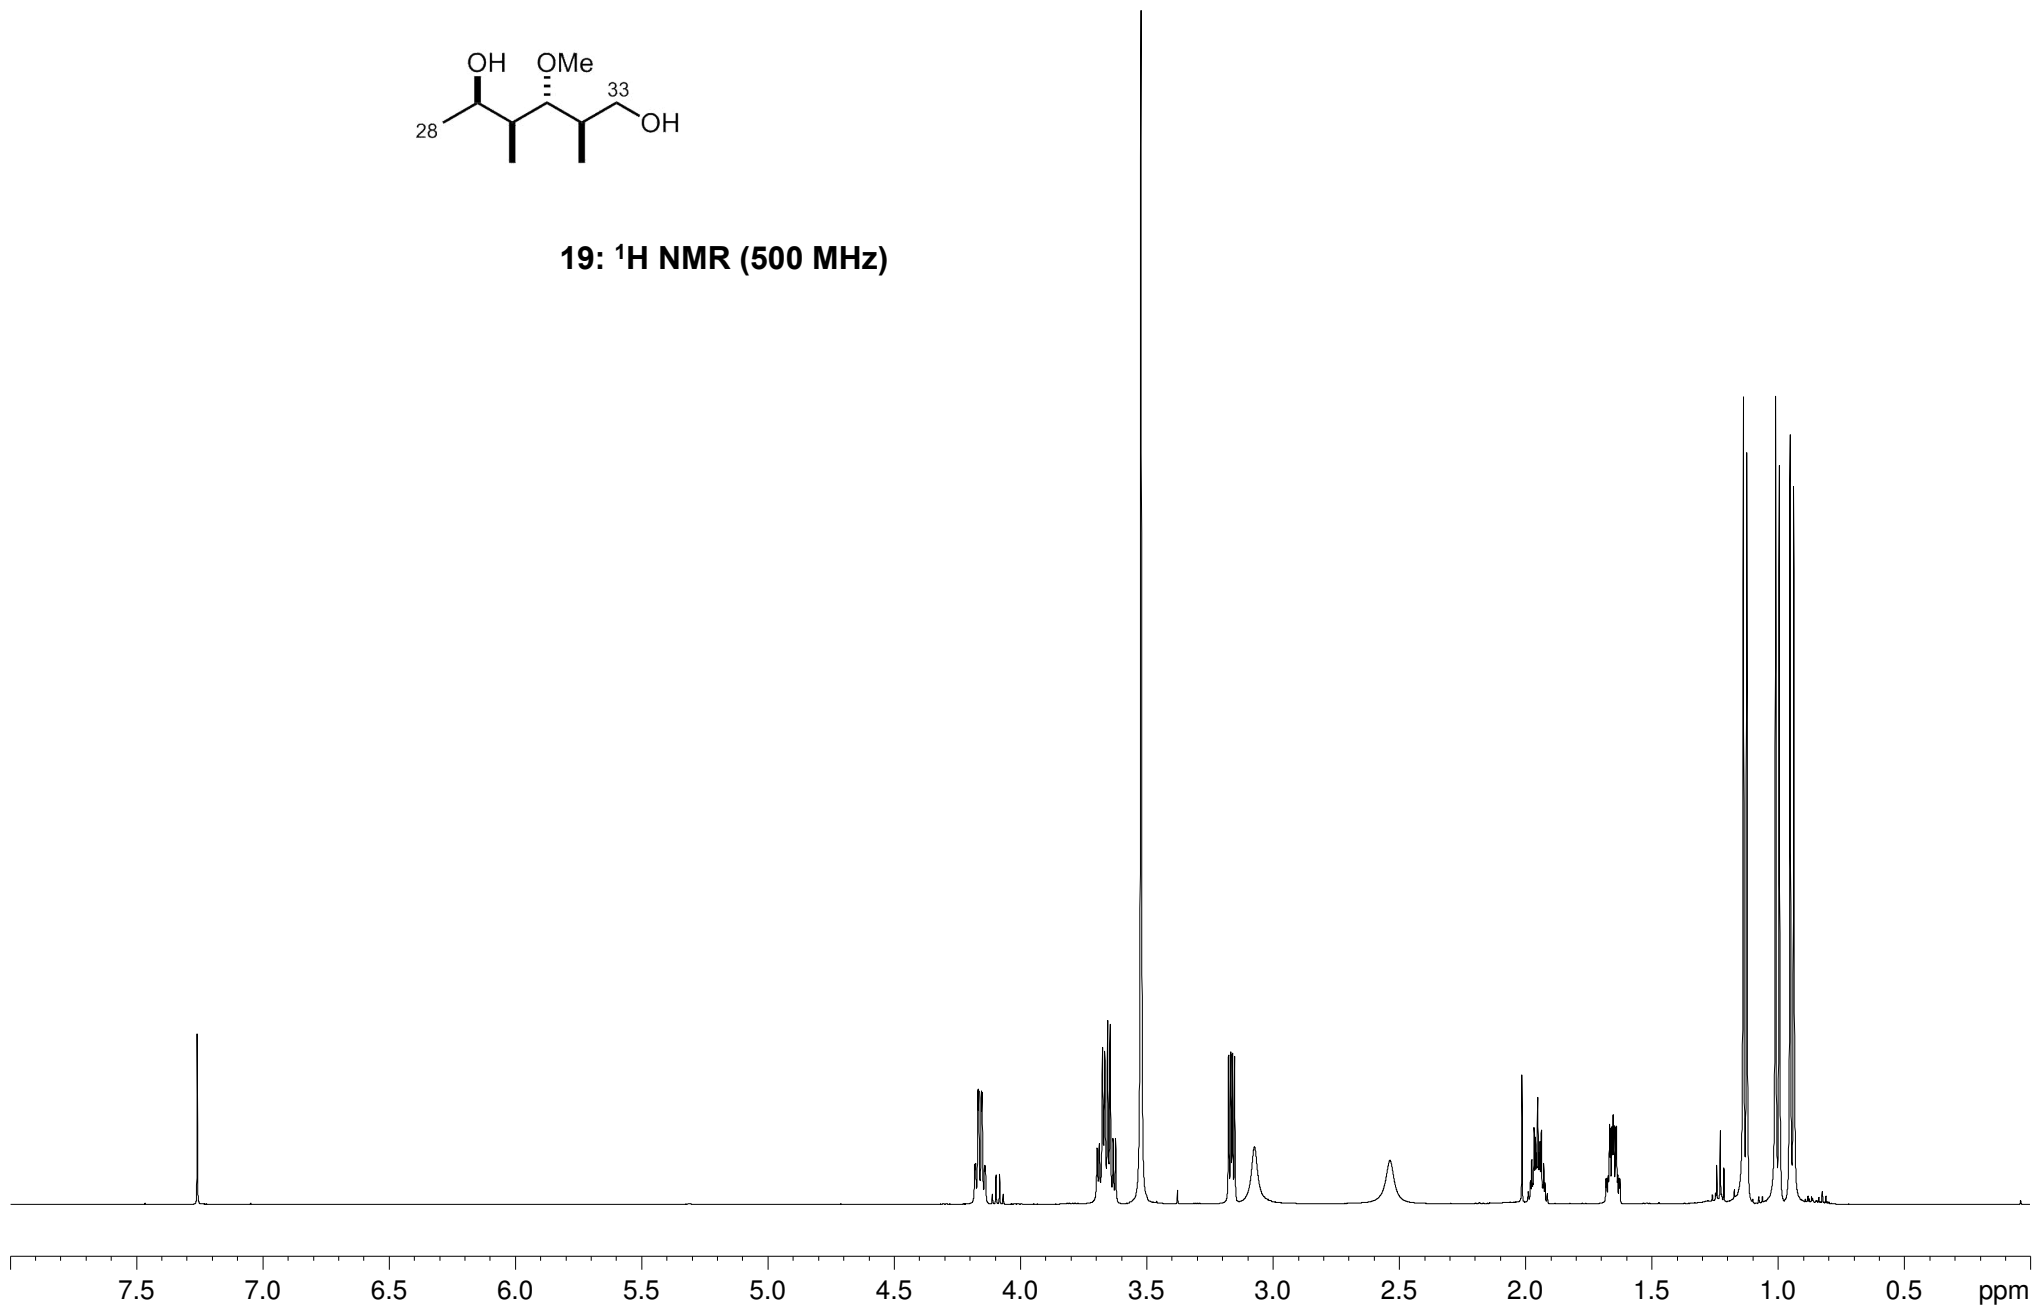



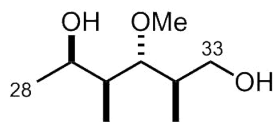

19:  $^{13}\text{C}$  NMR (125 MHz)

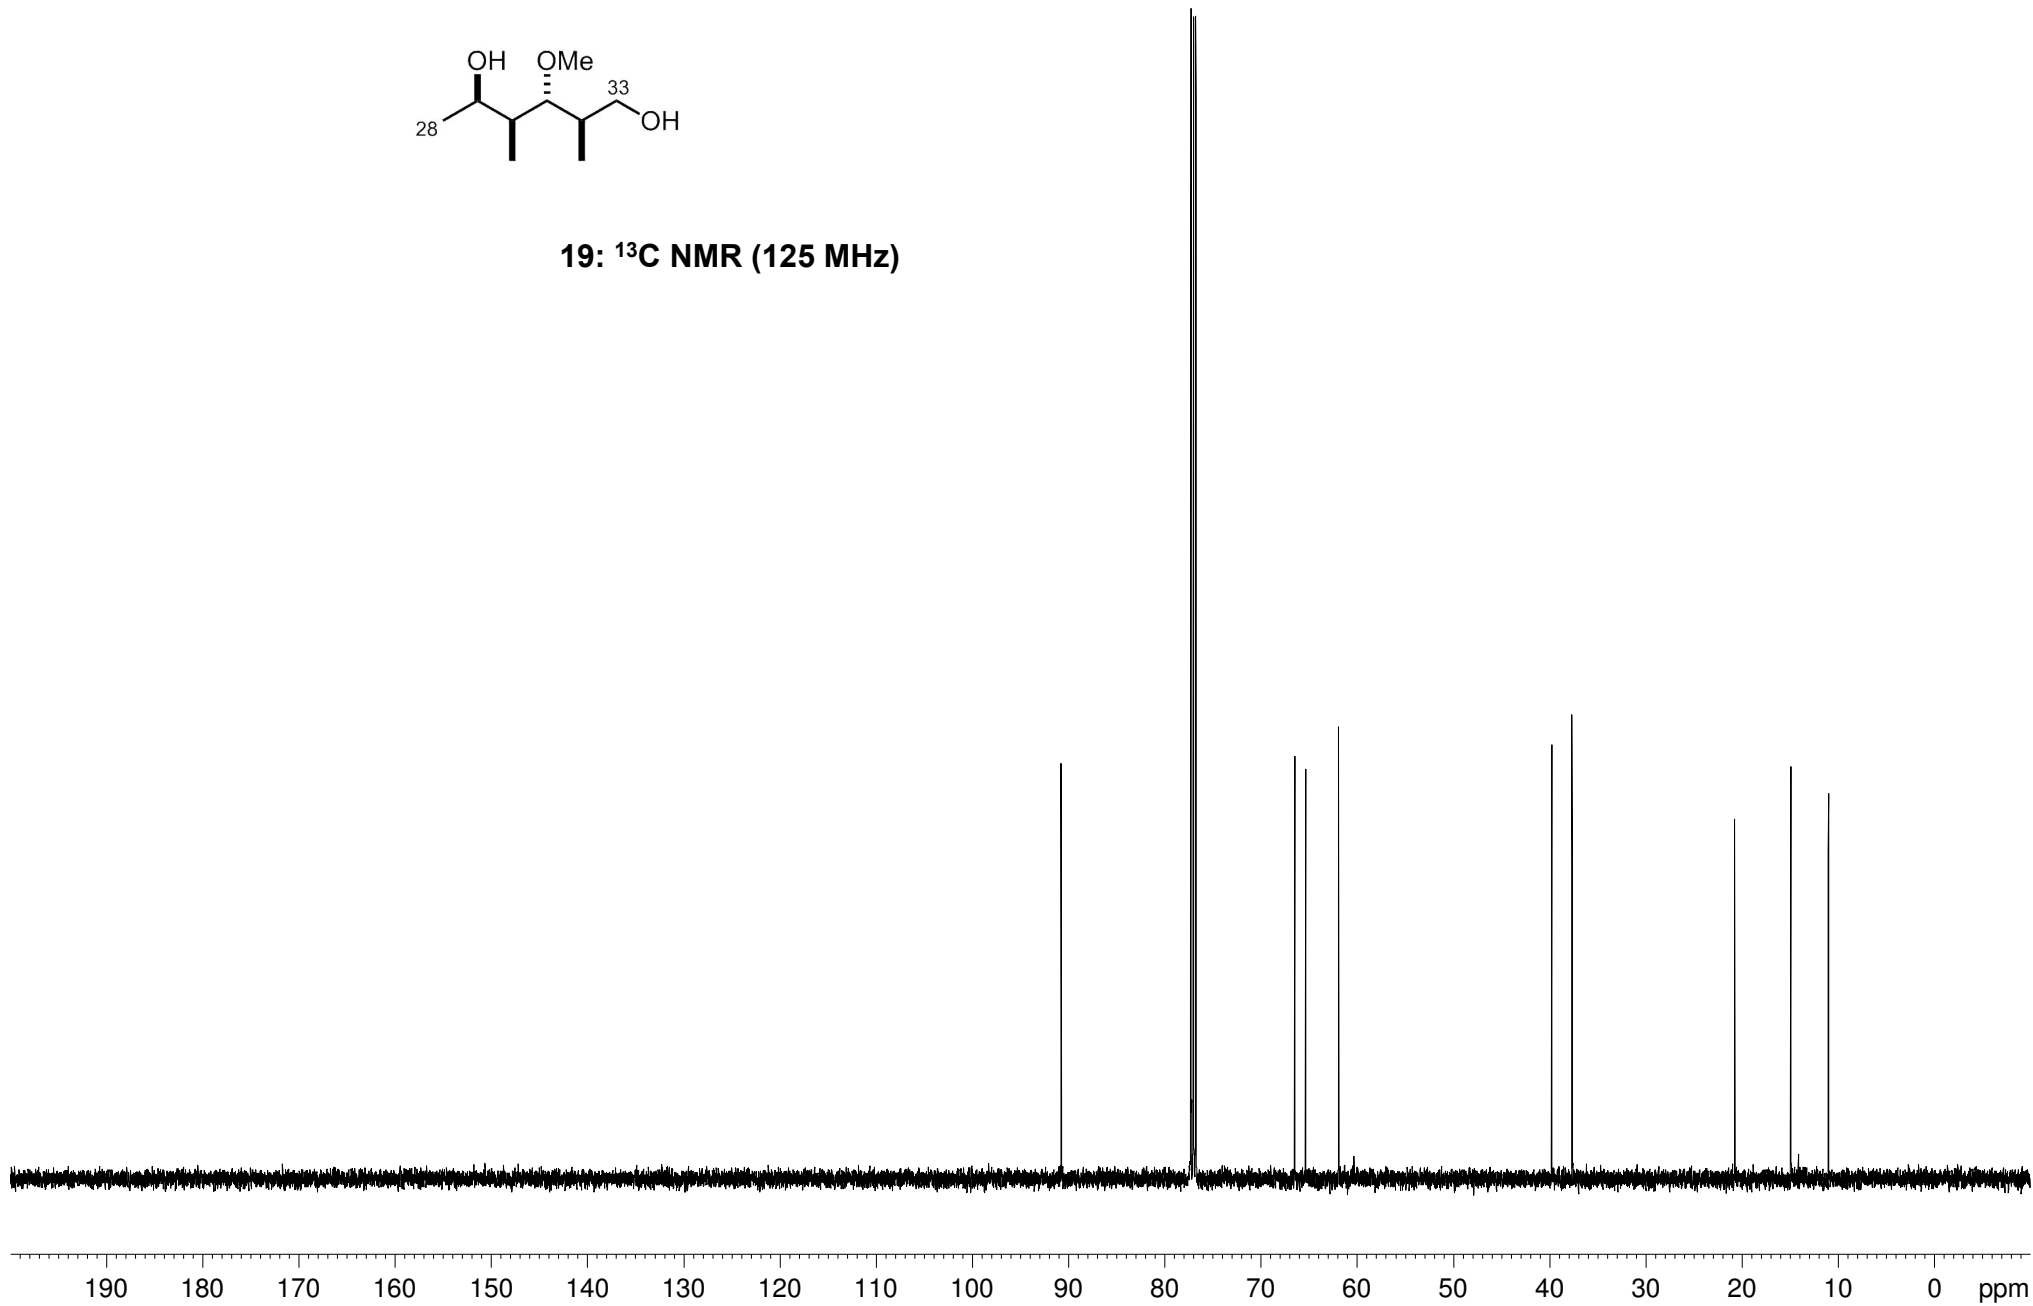

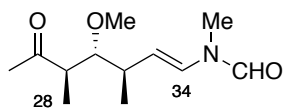

**E-11**  
**<sup>1</sup>H NMR 500 MHz**

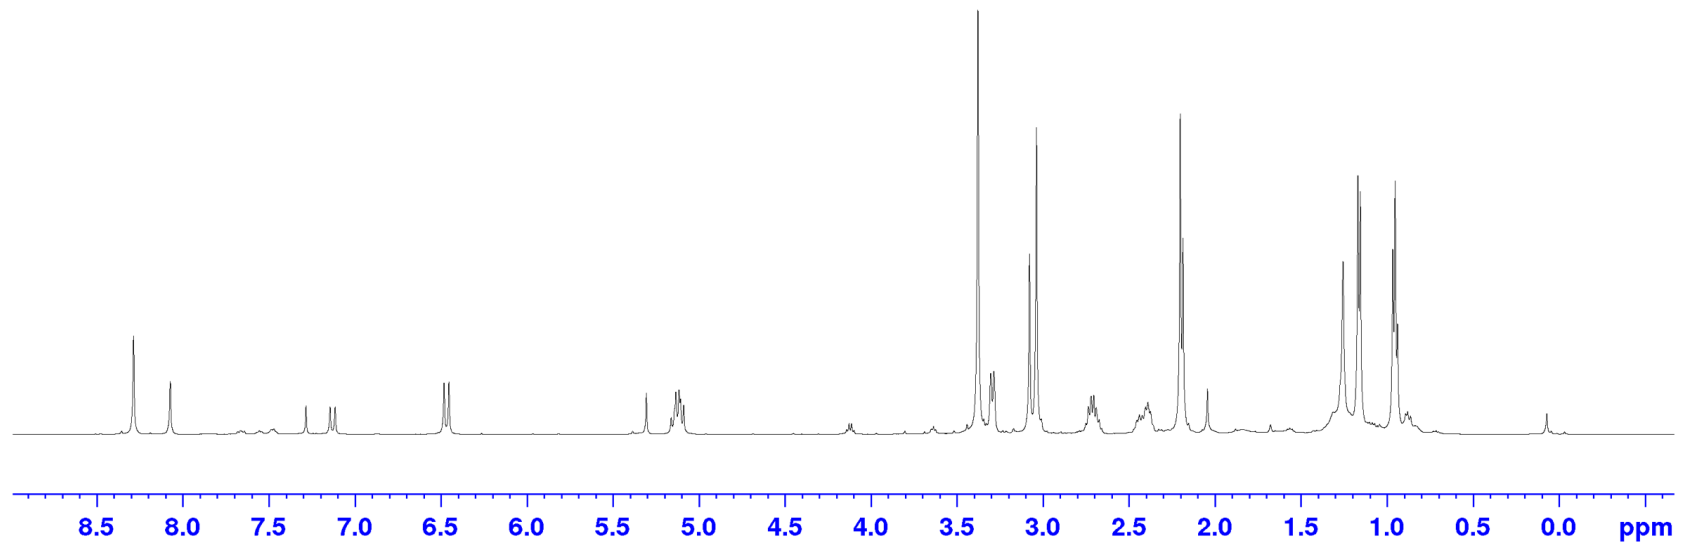

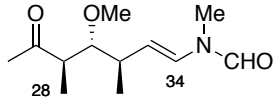

*E*-11  
<sup>13</sup>C NMR 125 MHz

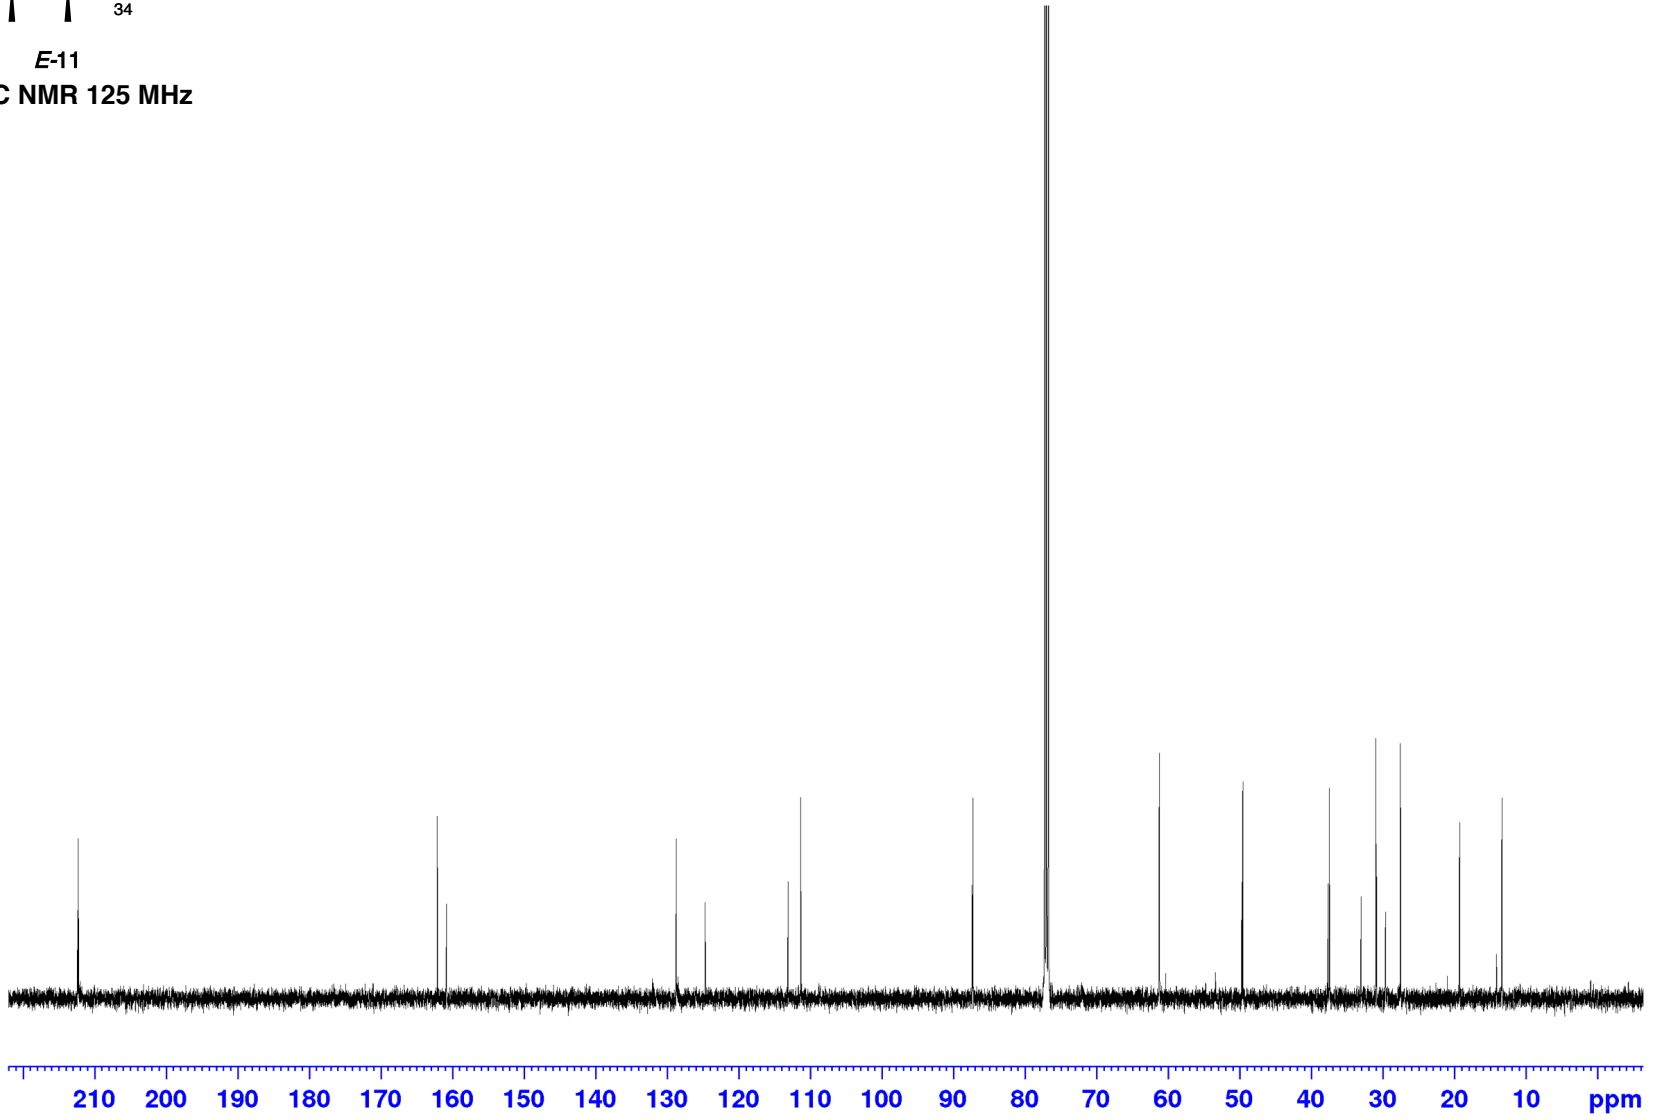



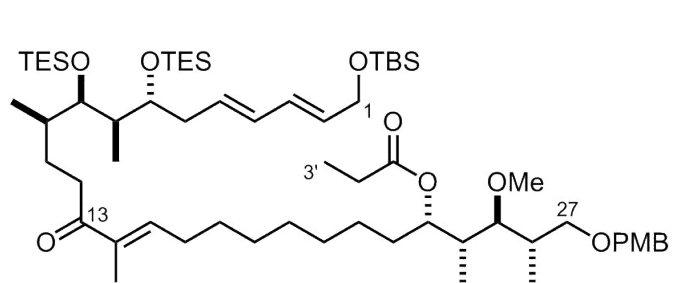

22:  $^{13}\text{C}$  NMR (125 MHz)

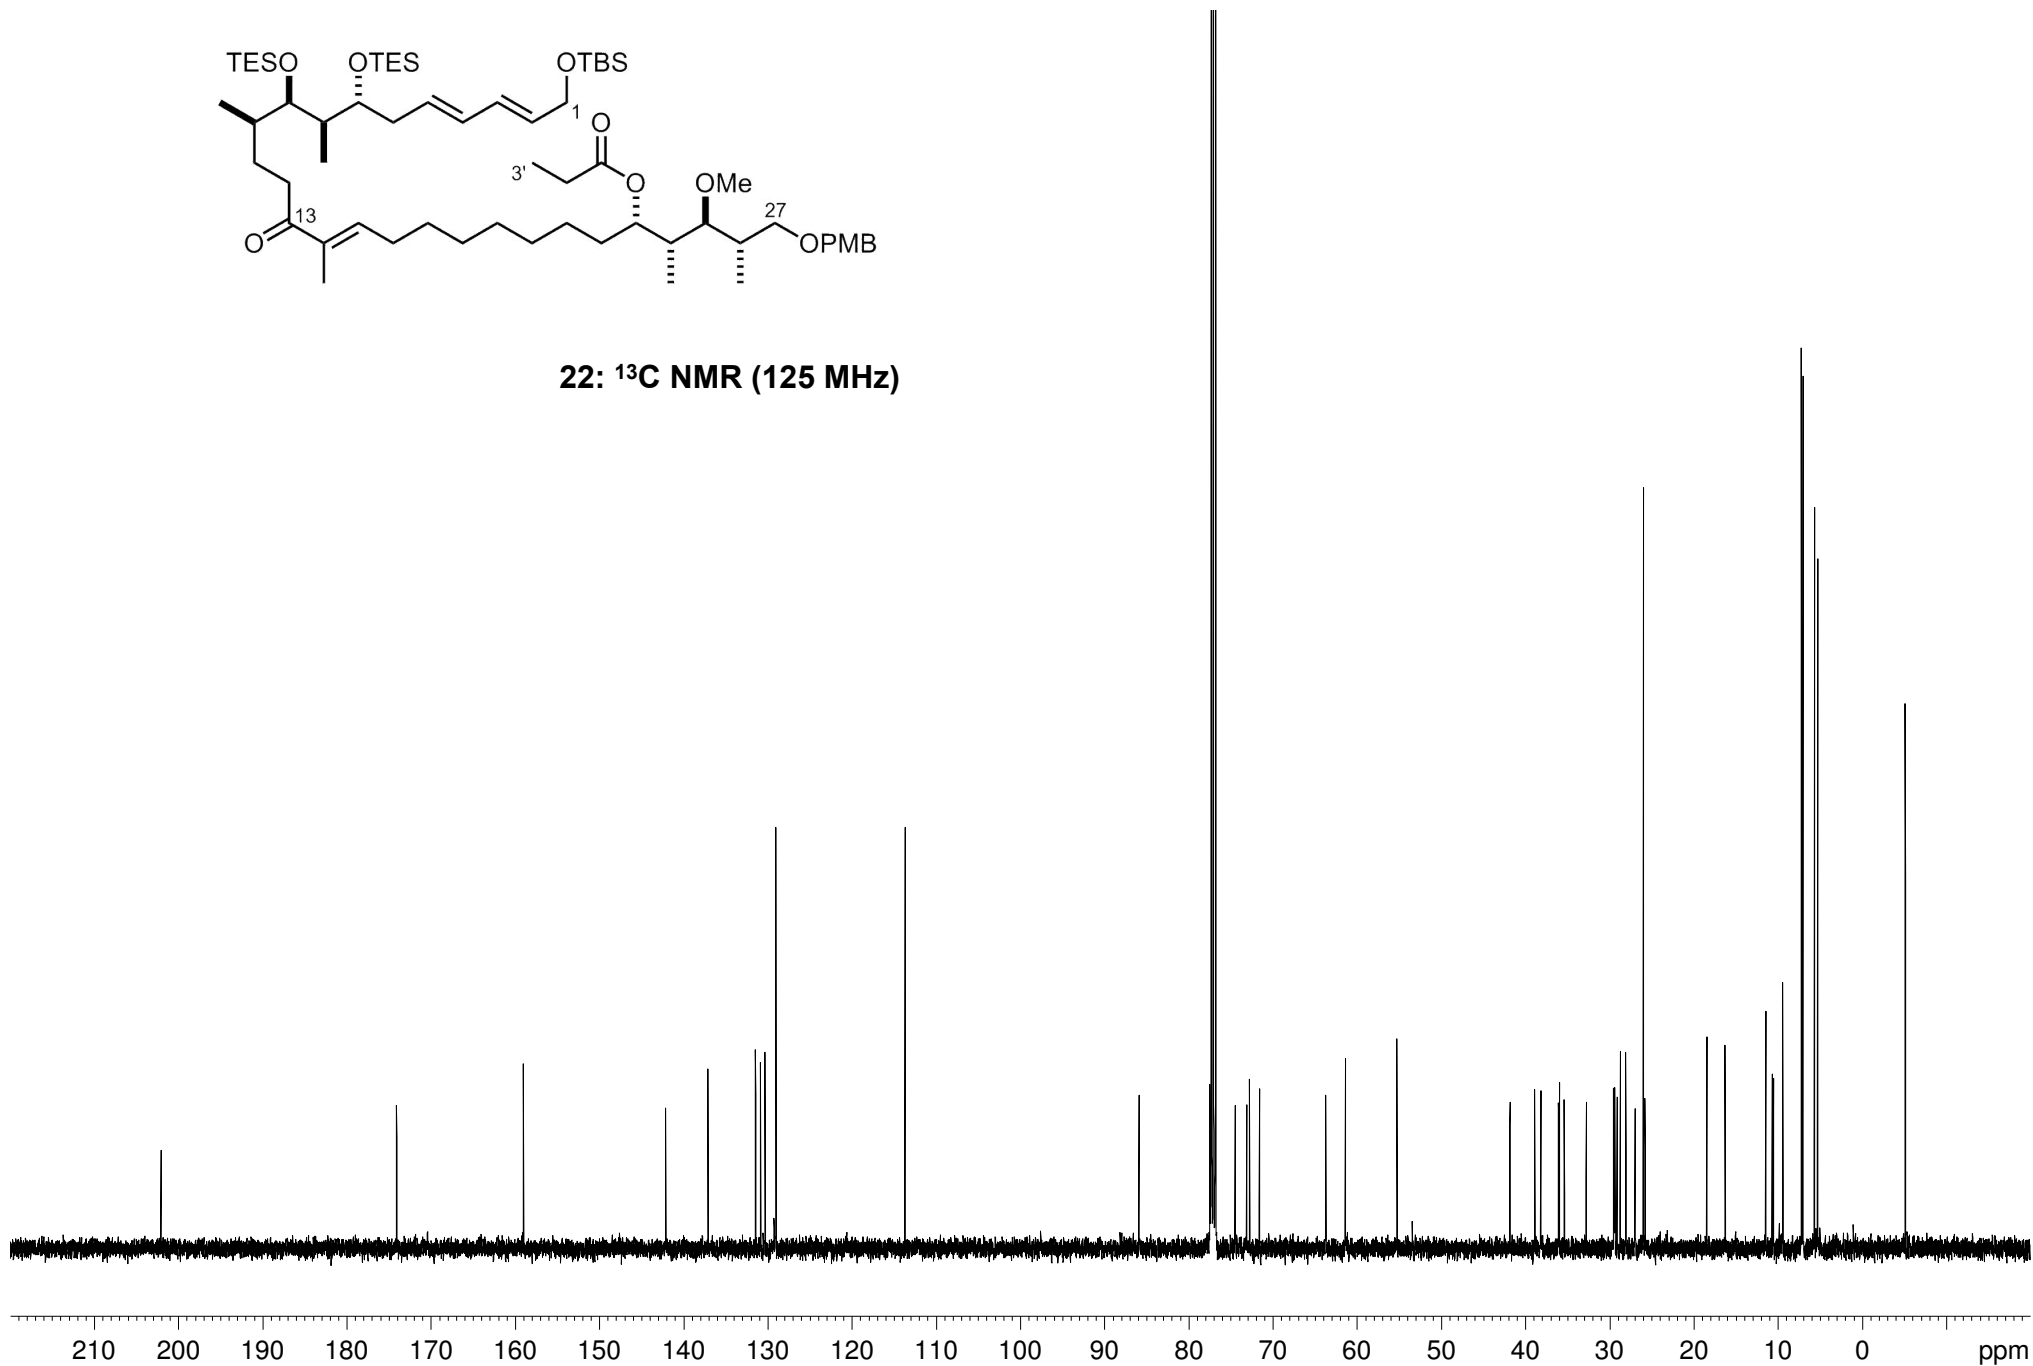

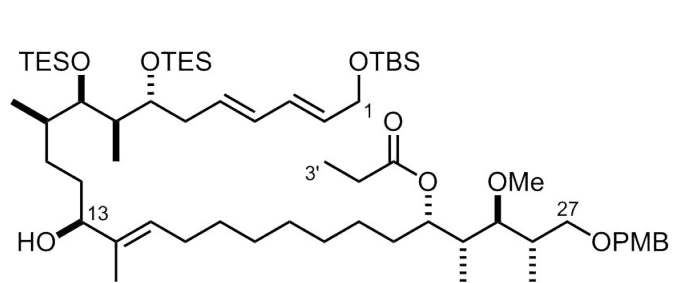

22a: <sup>1</sup>H NMR (500 MHz)

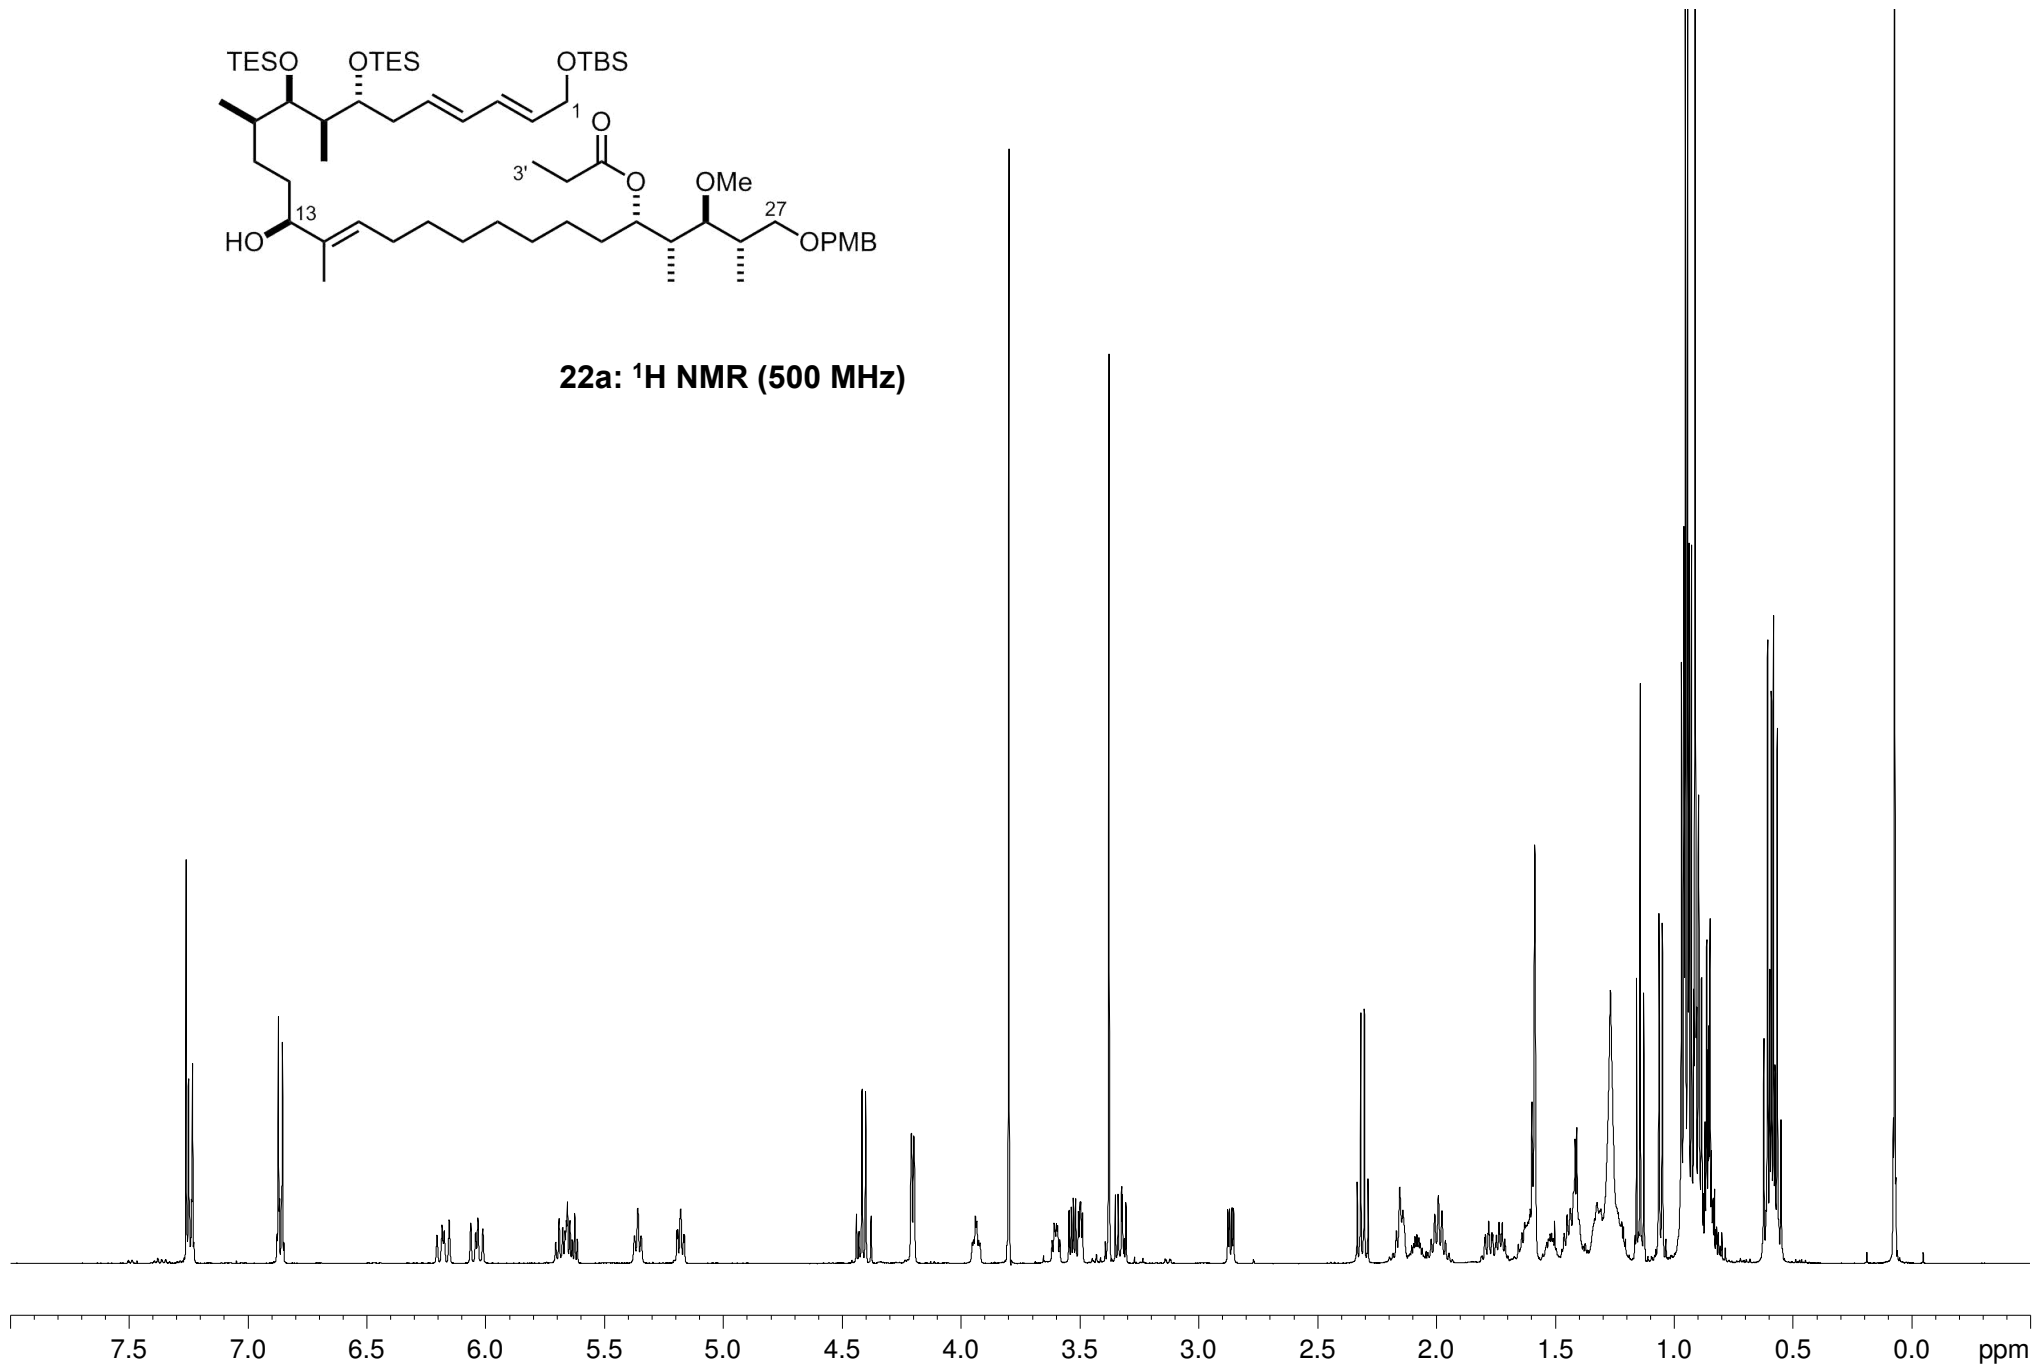



22a:  $^{13}\text{C}$  NMR (125 MHz)

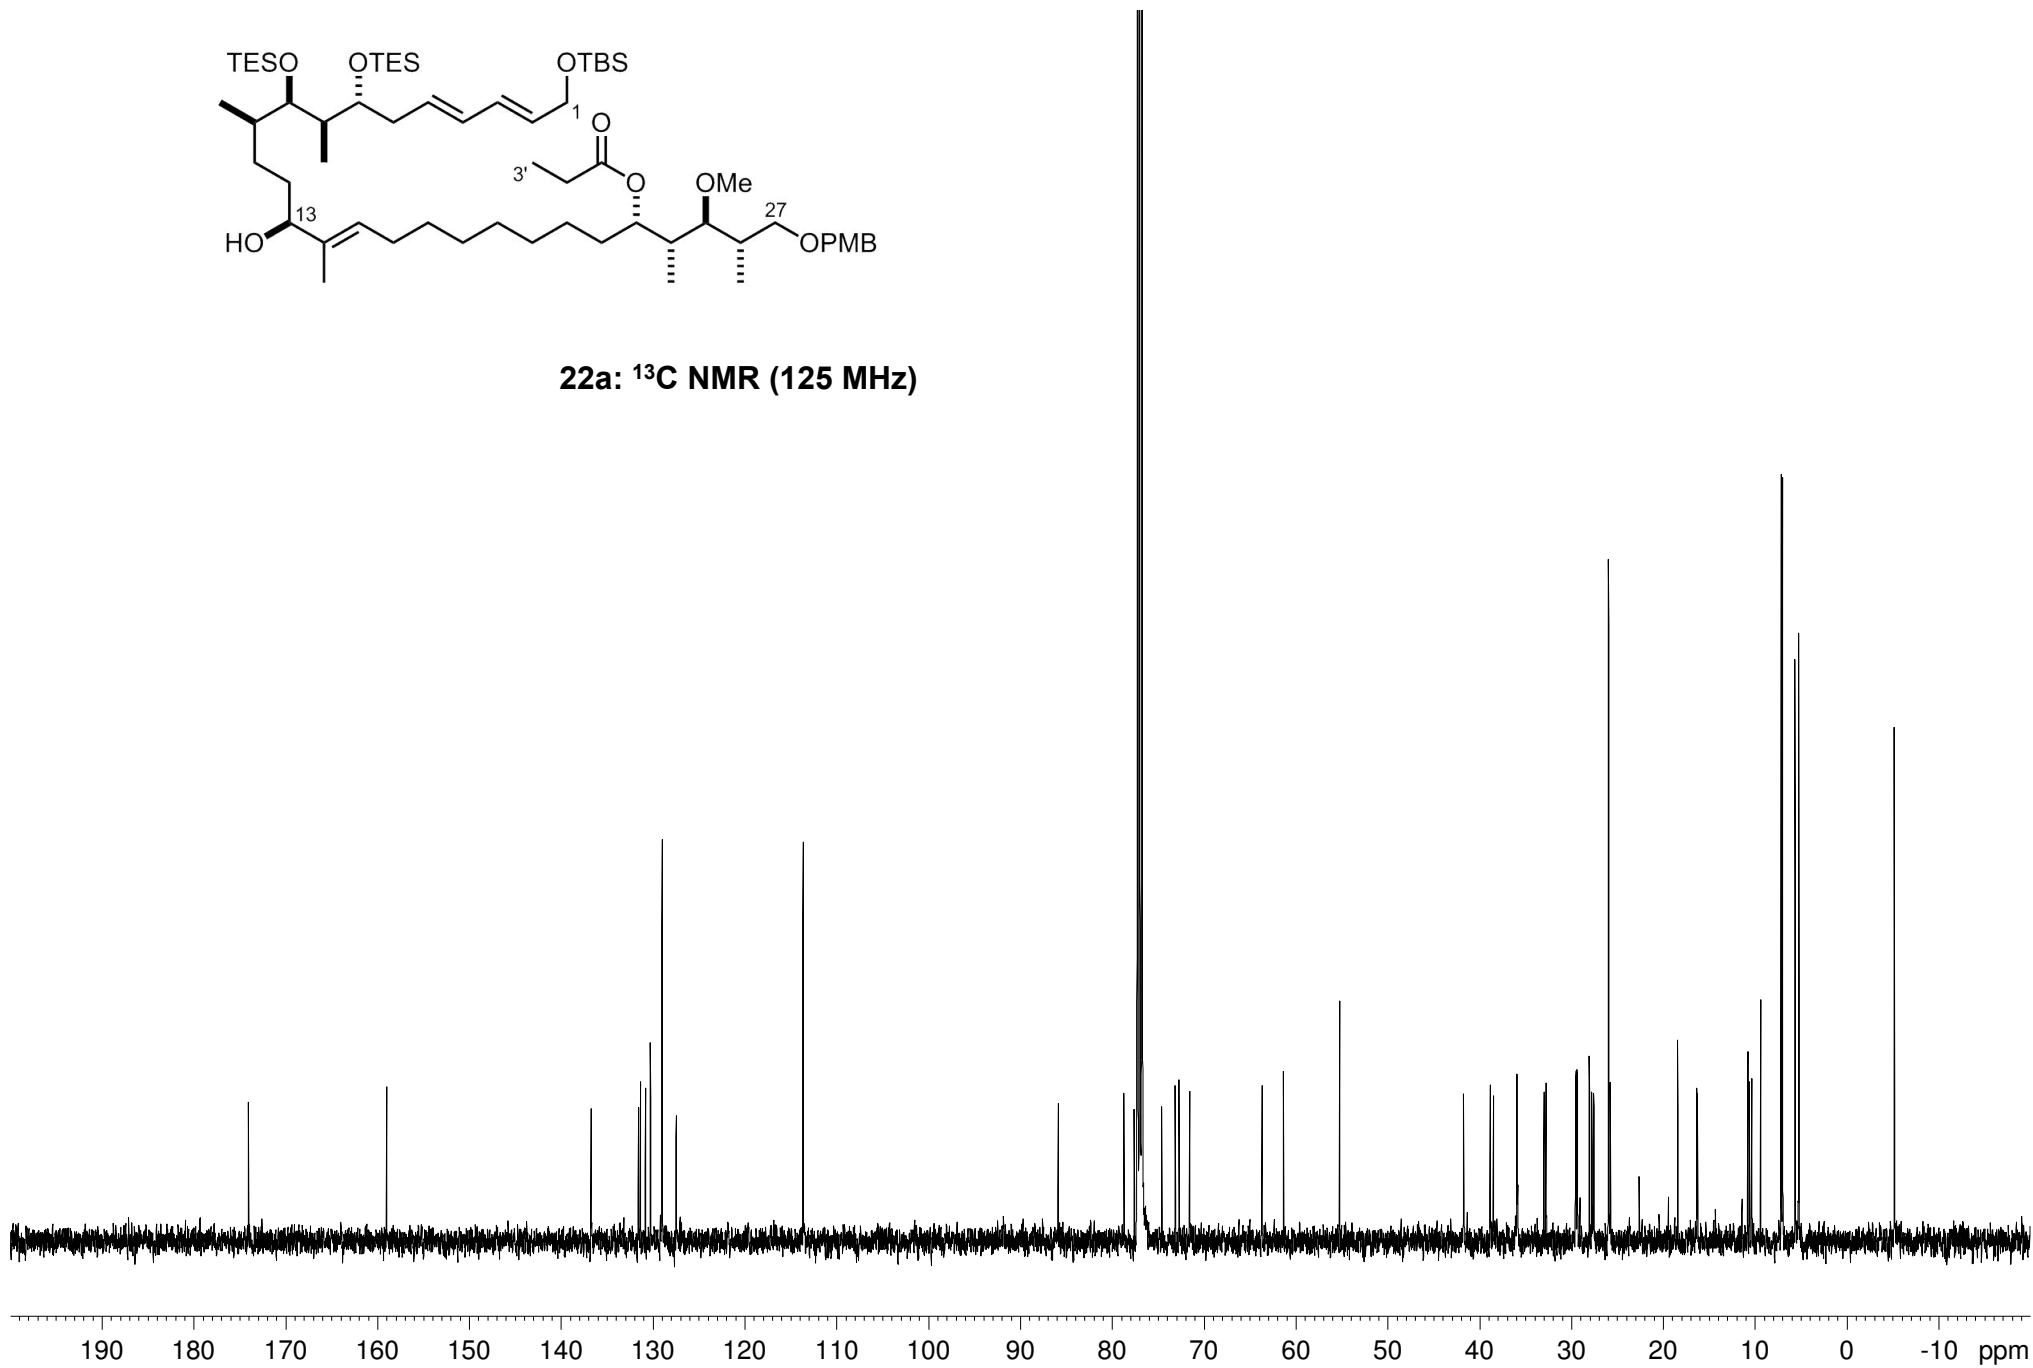















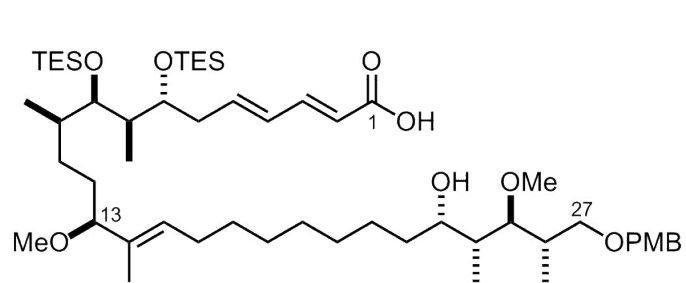

24: <sup>1</sup>H NMR (500 MHz)

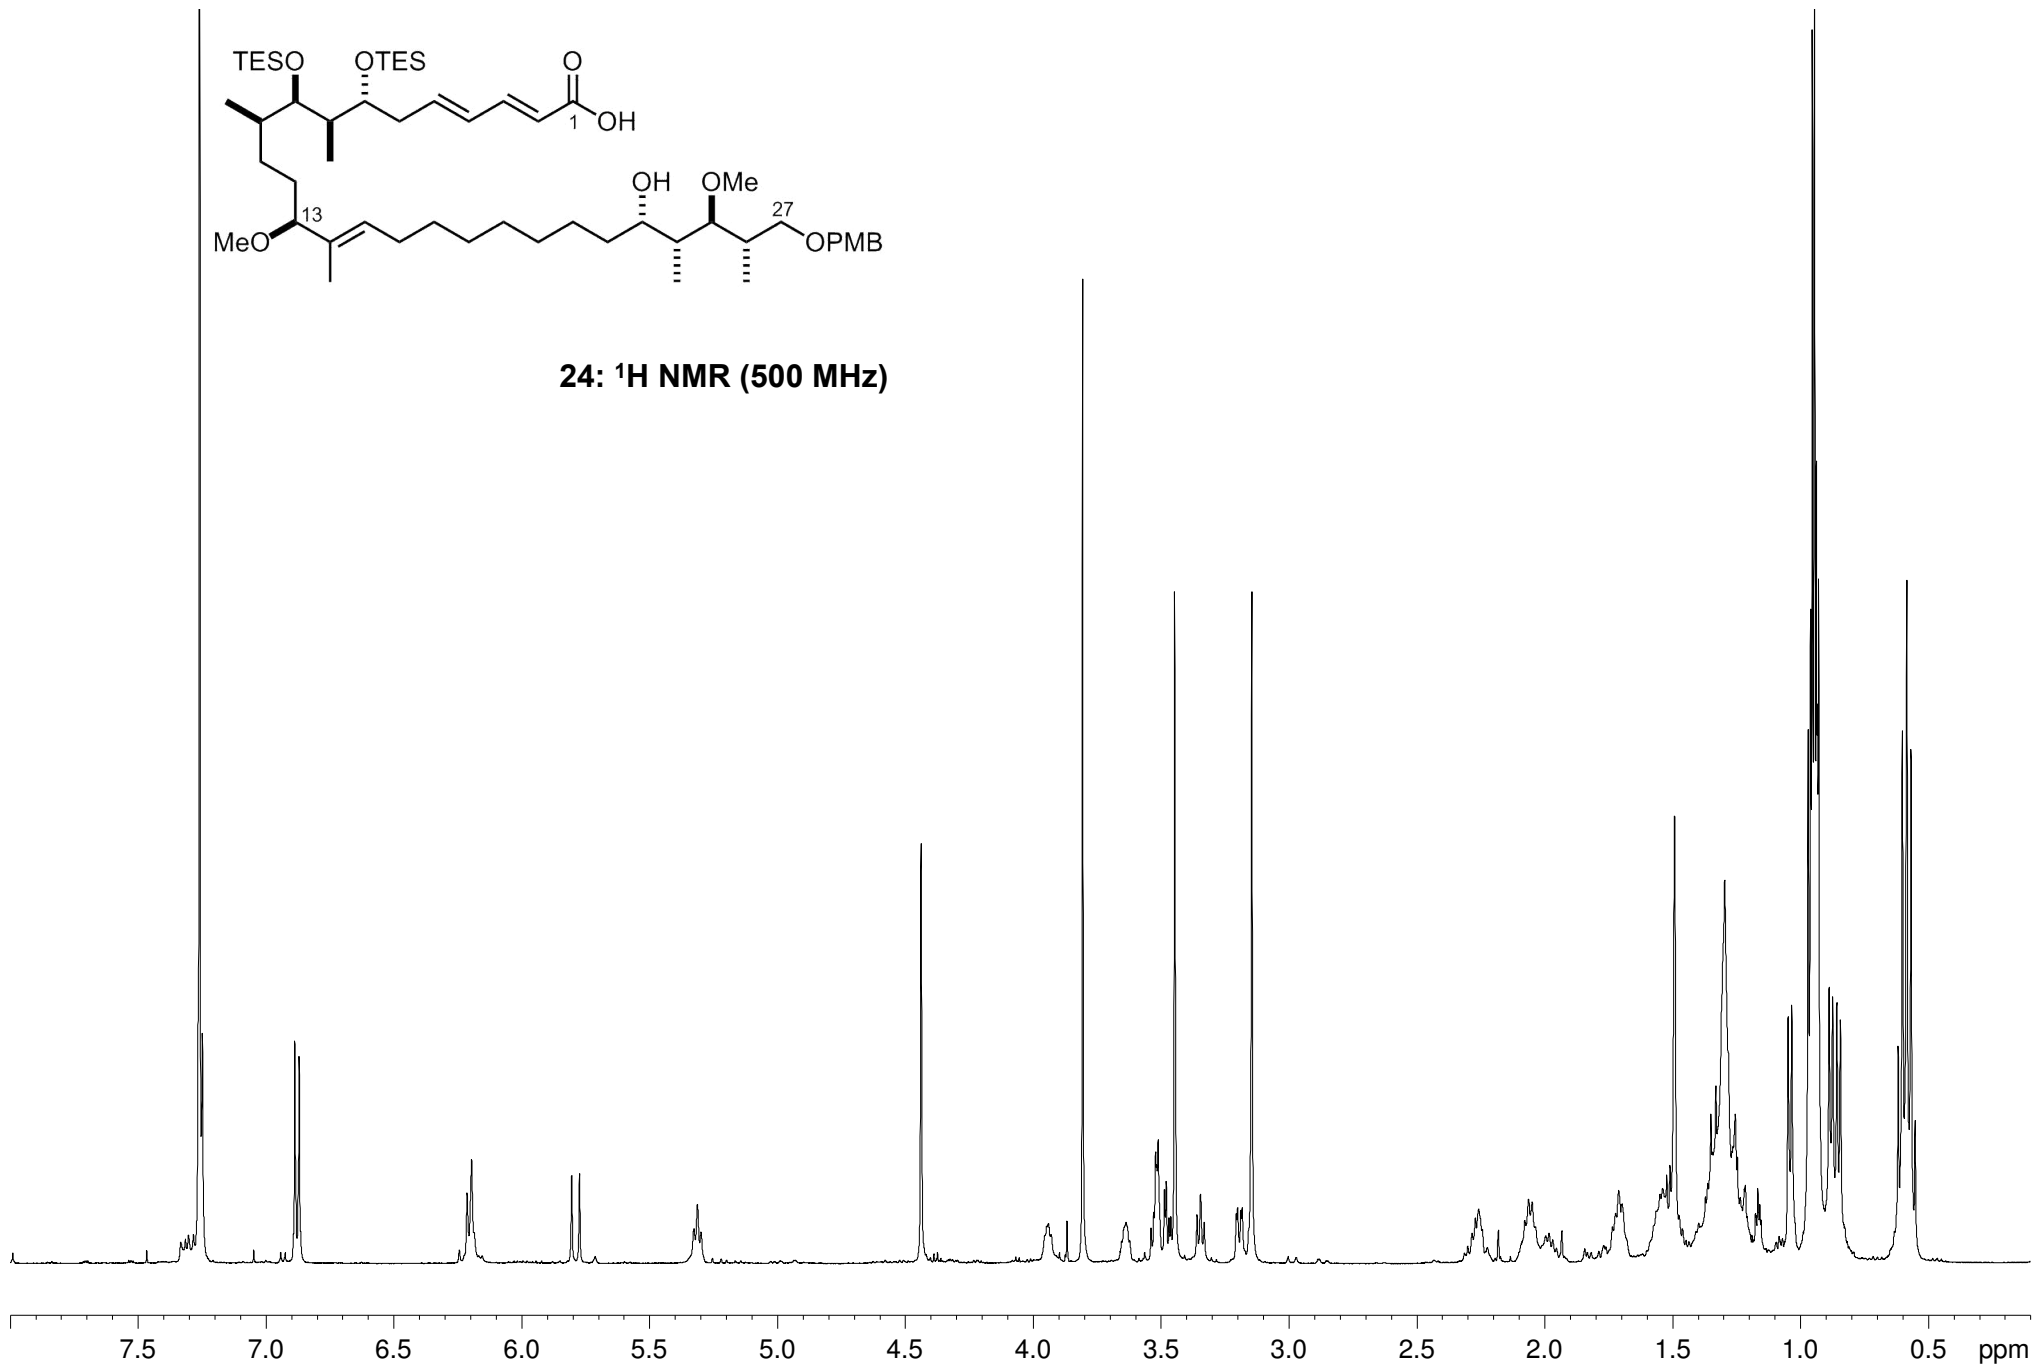













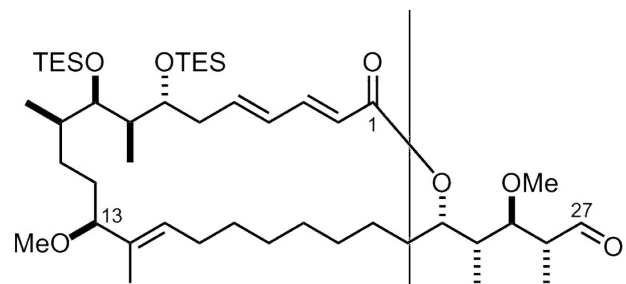

26:  $^1\text{H}$  NMR (500 MHz)

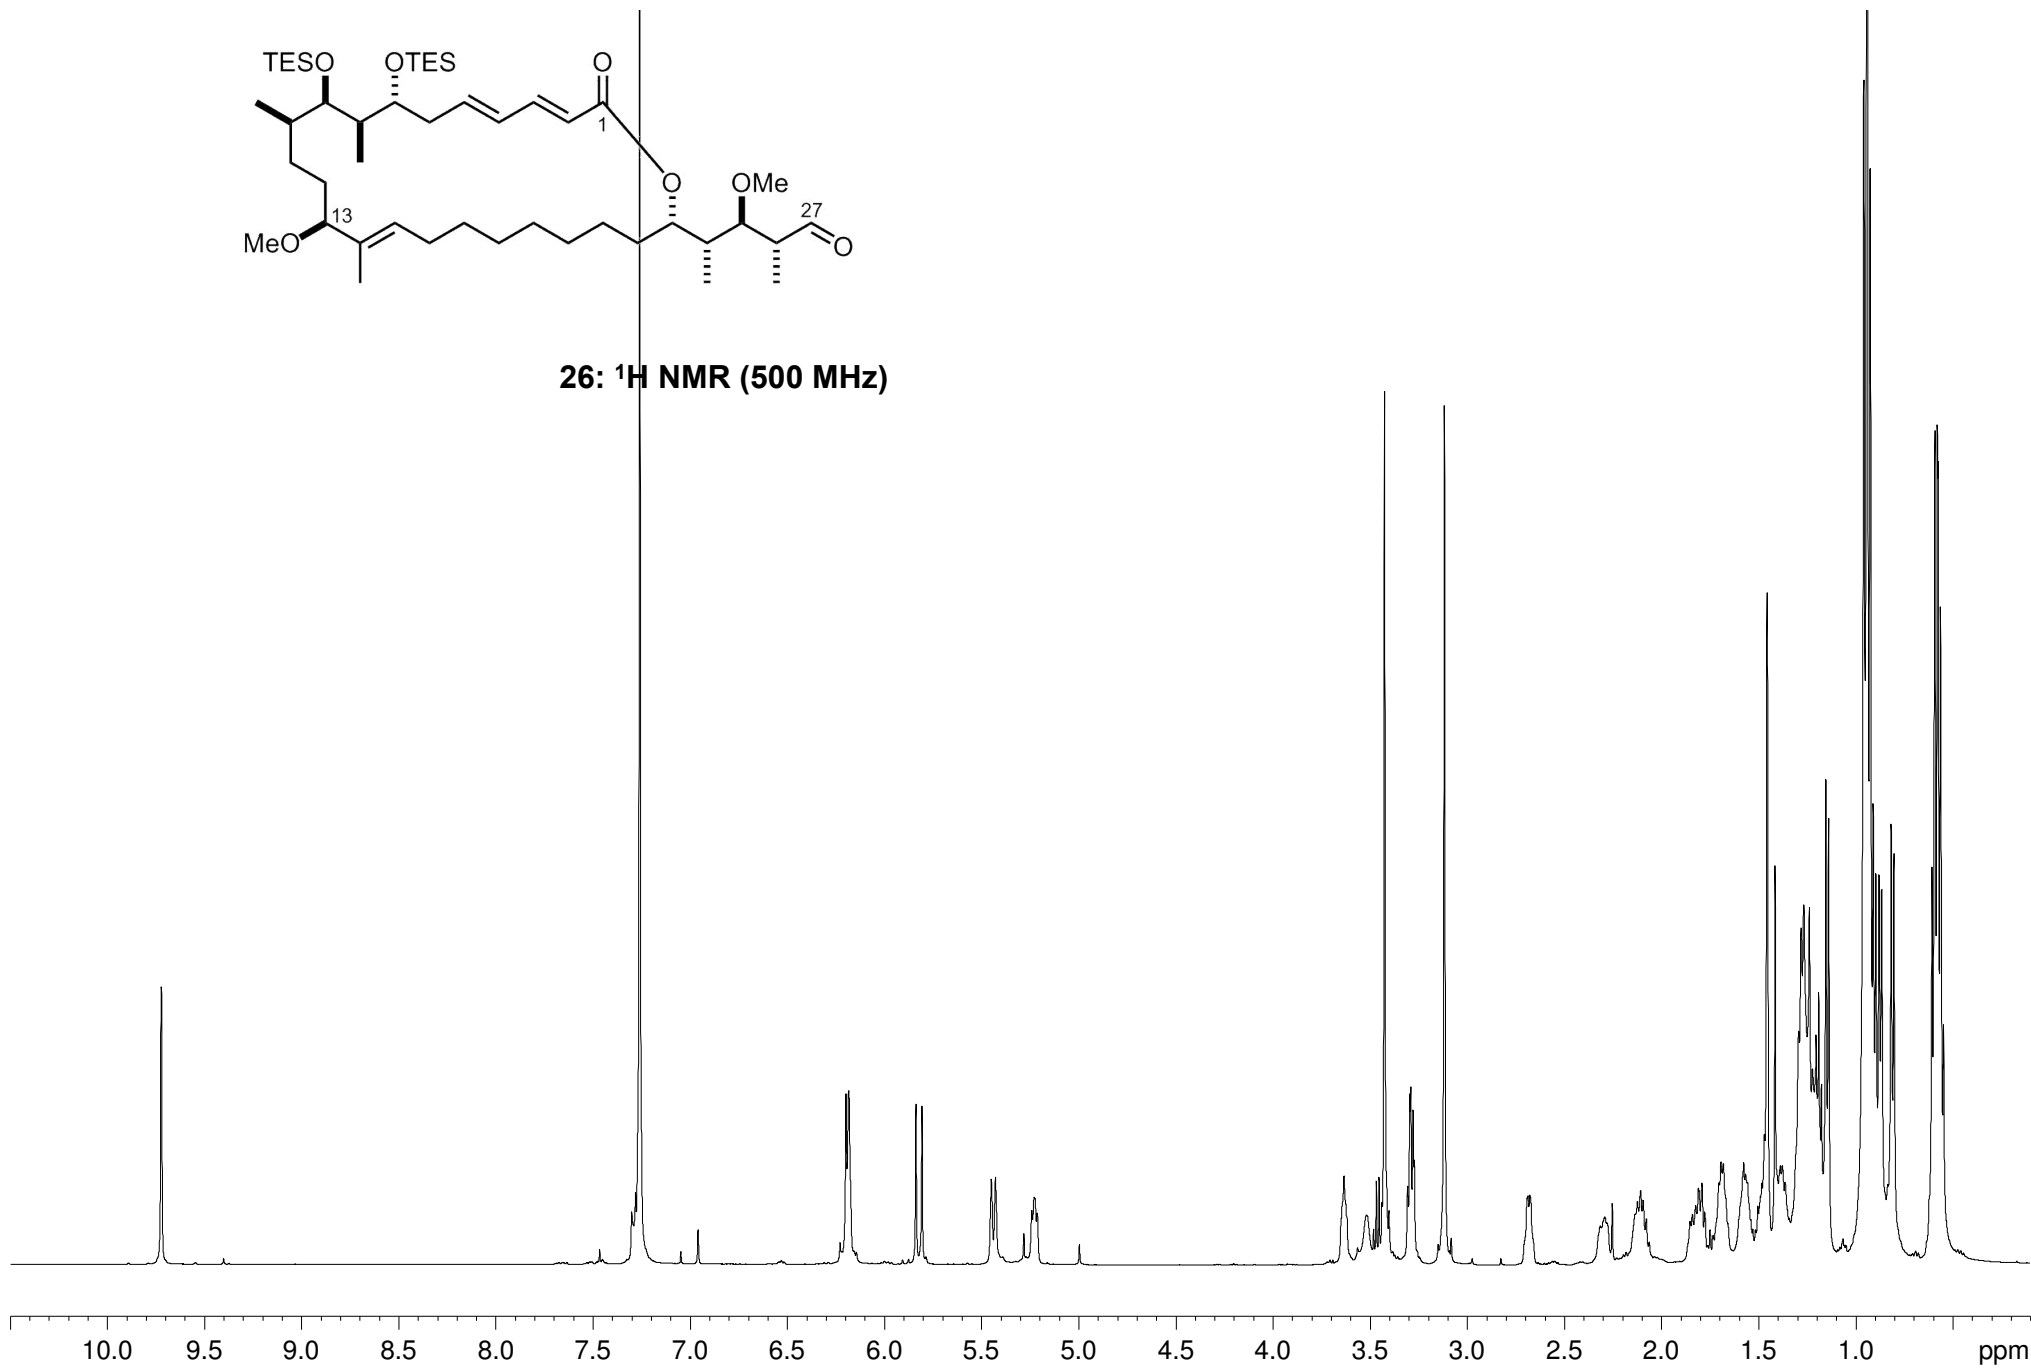



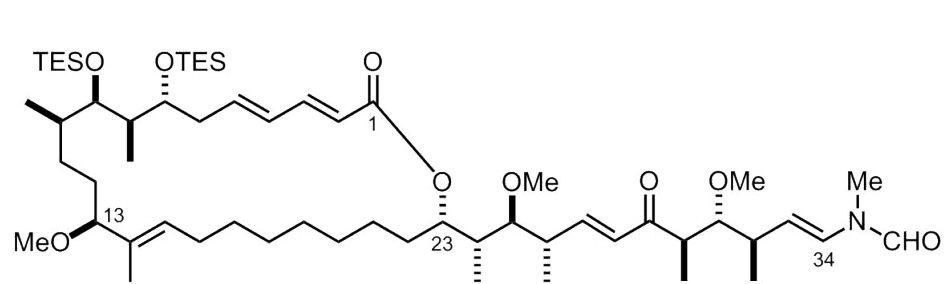

**26a:  $^1\text{H}$  NMR (500 MHz)**

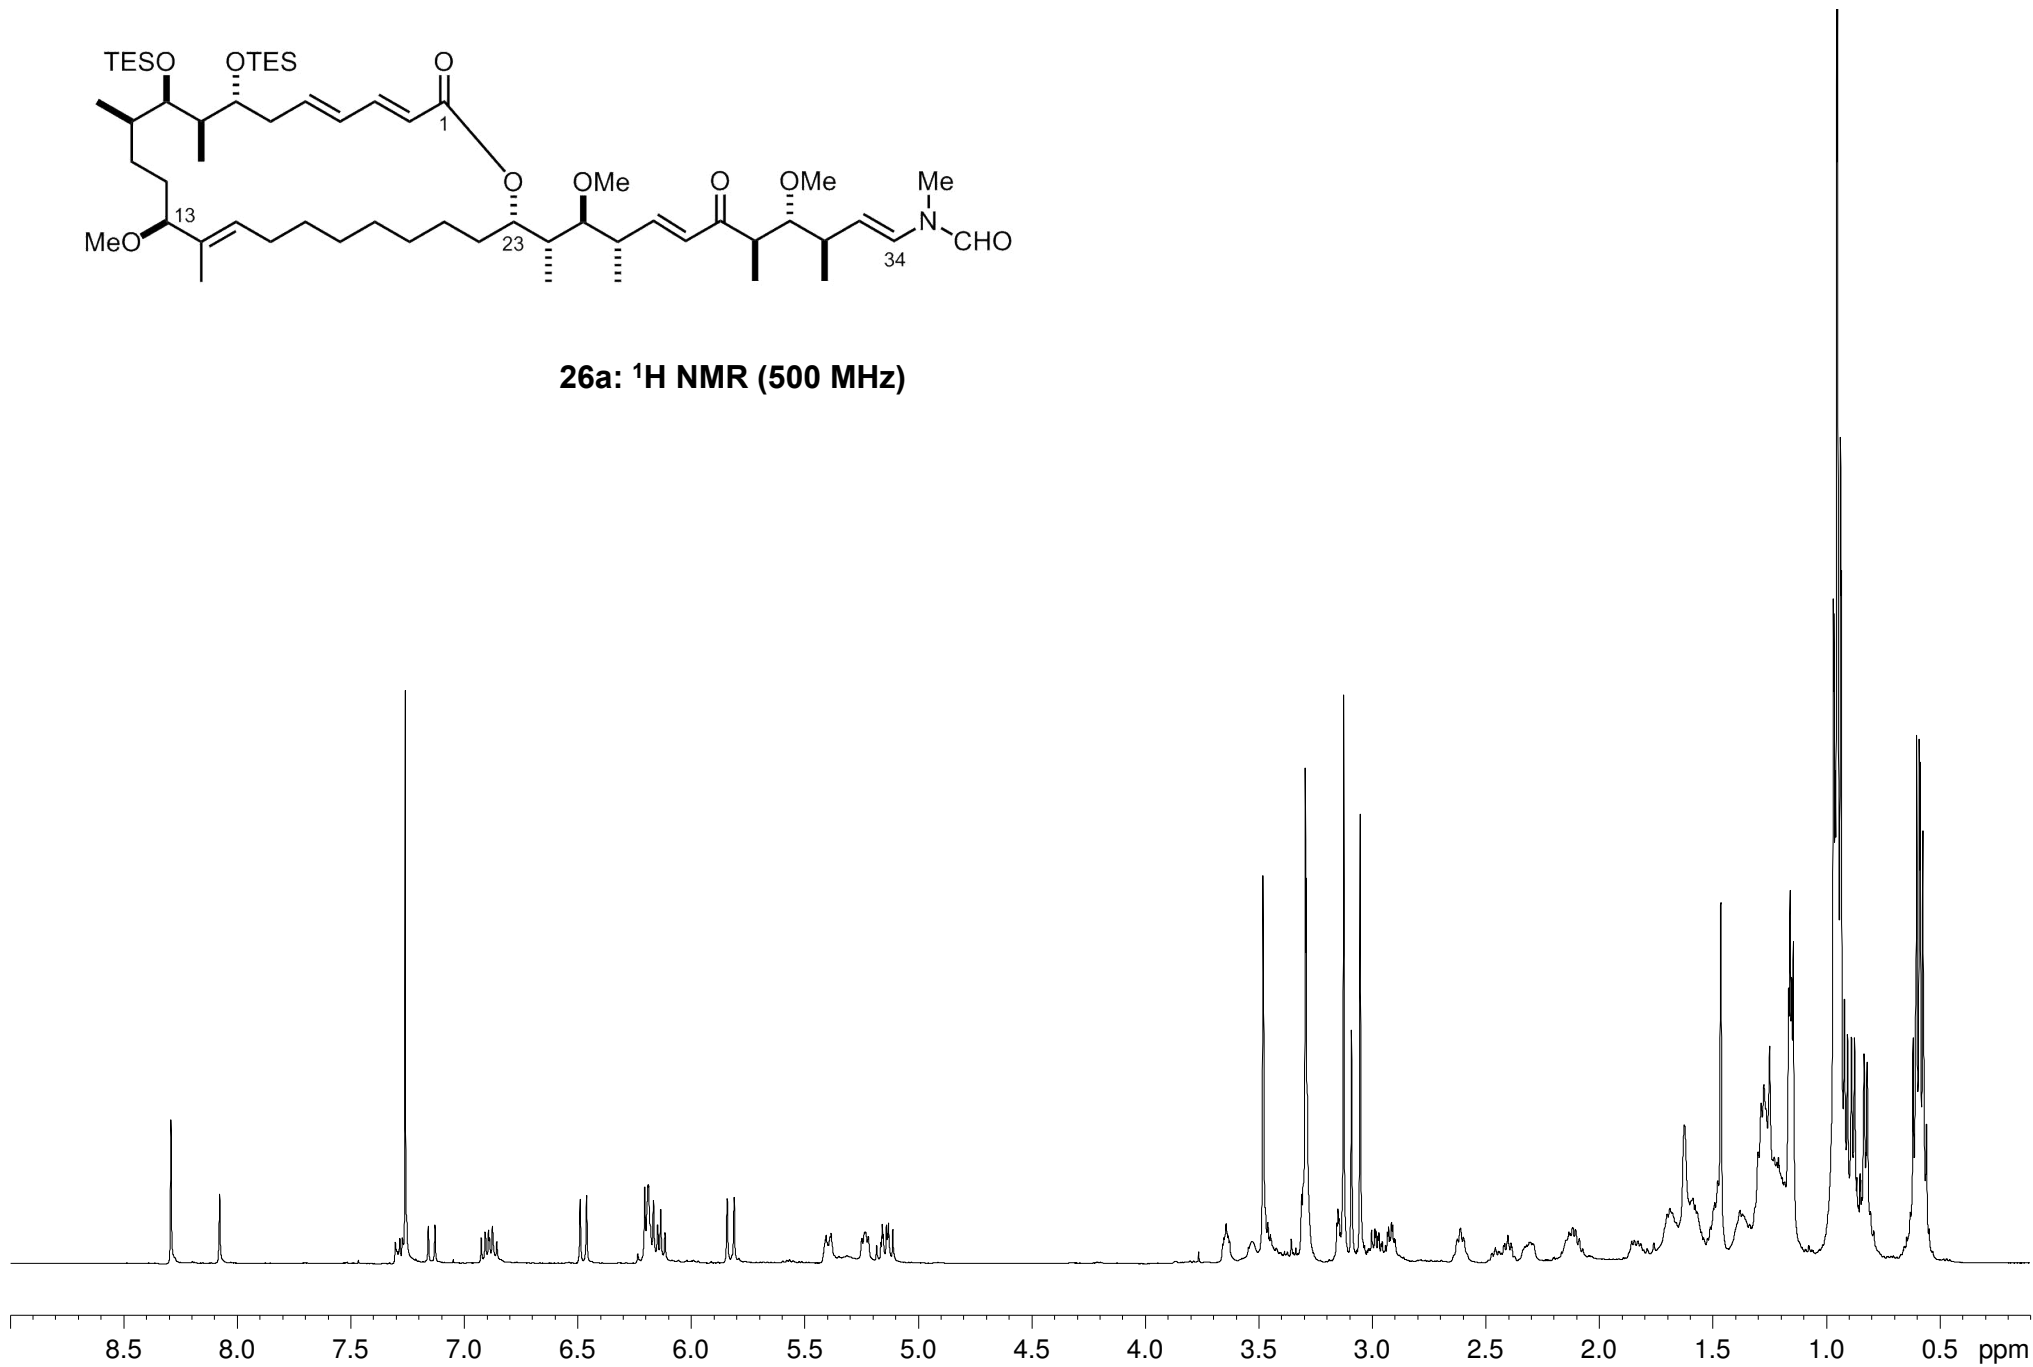



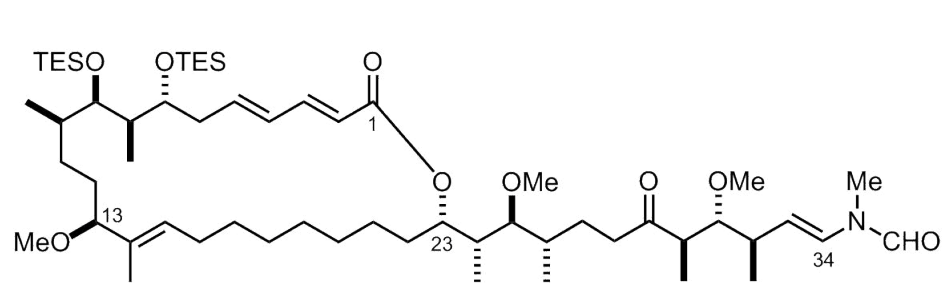

**10:  $^1\text{H}$  NMR (500 MHz)**

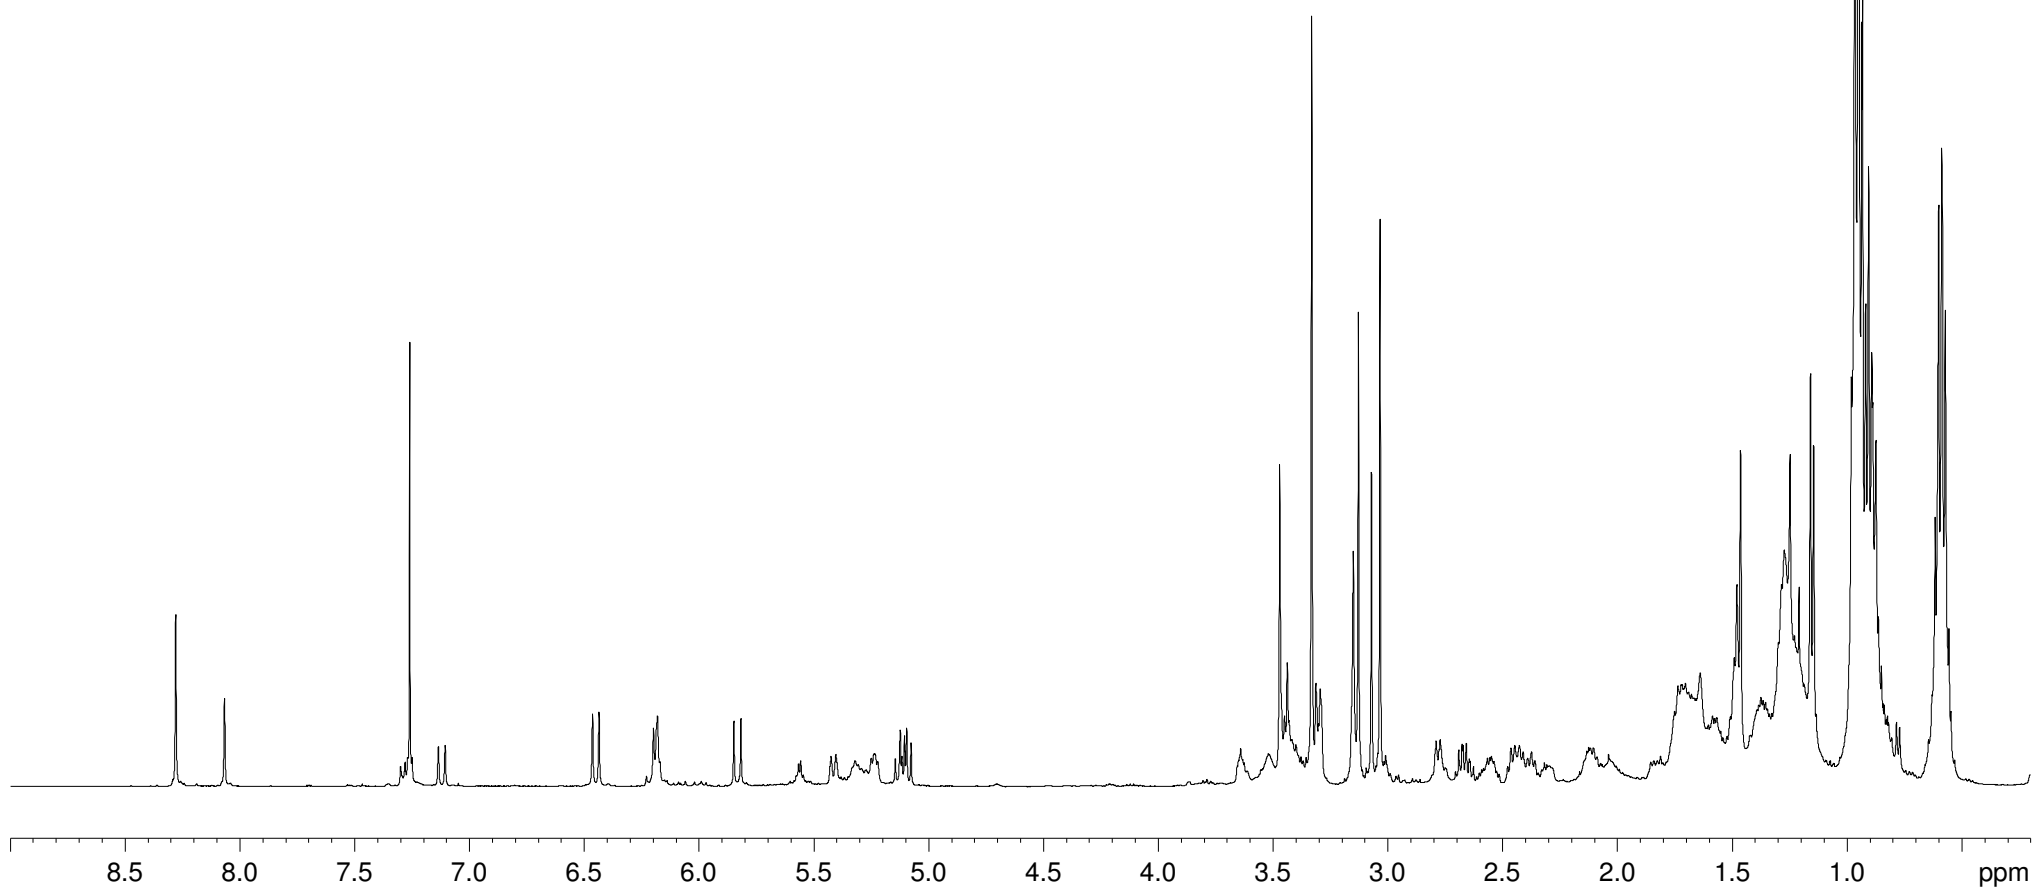





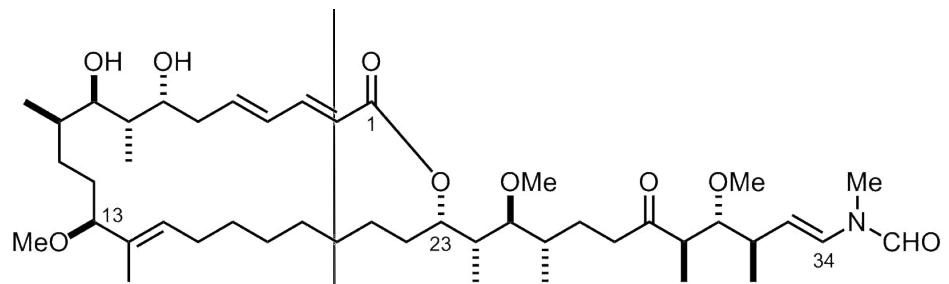

**9: <sup>1</sup>H NMR (500 MHz)**  
Aplyronine C/  
scytophycin hybrid

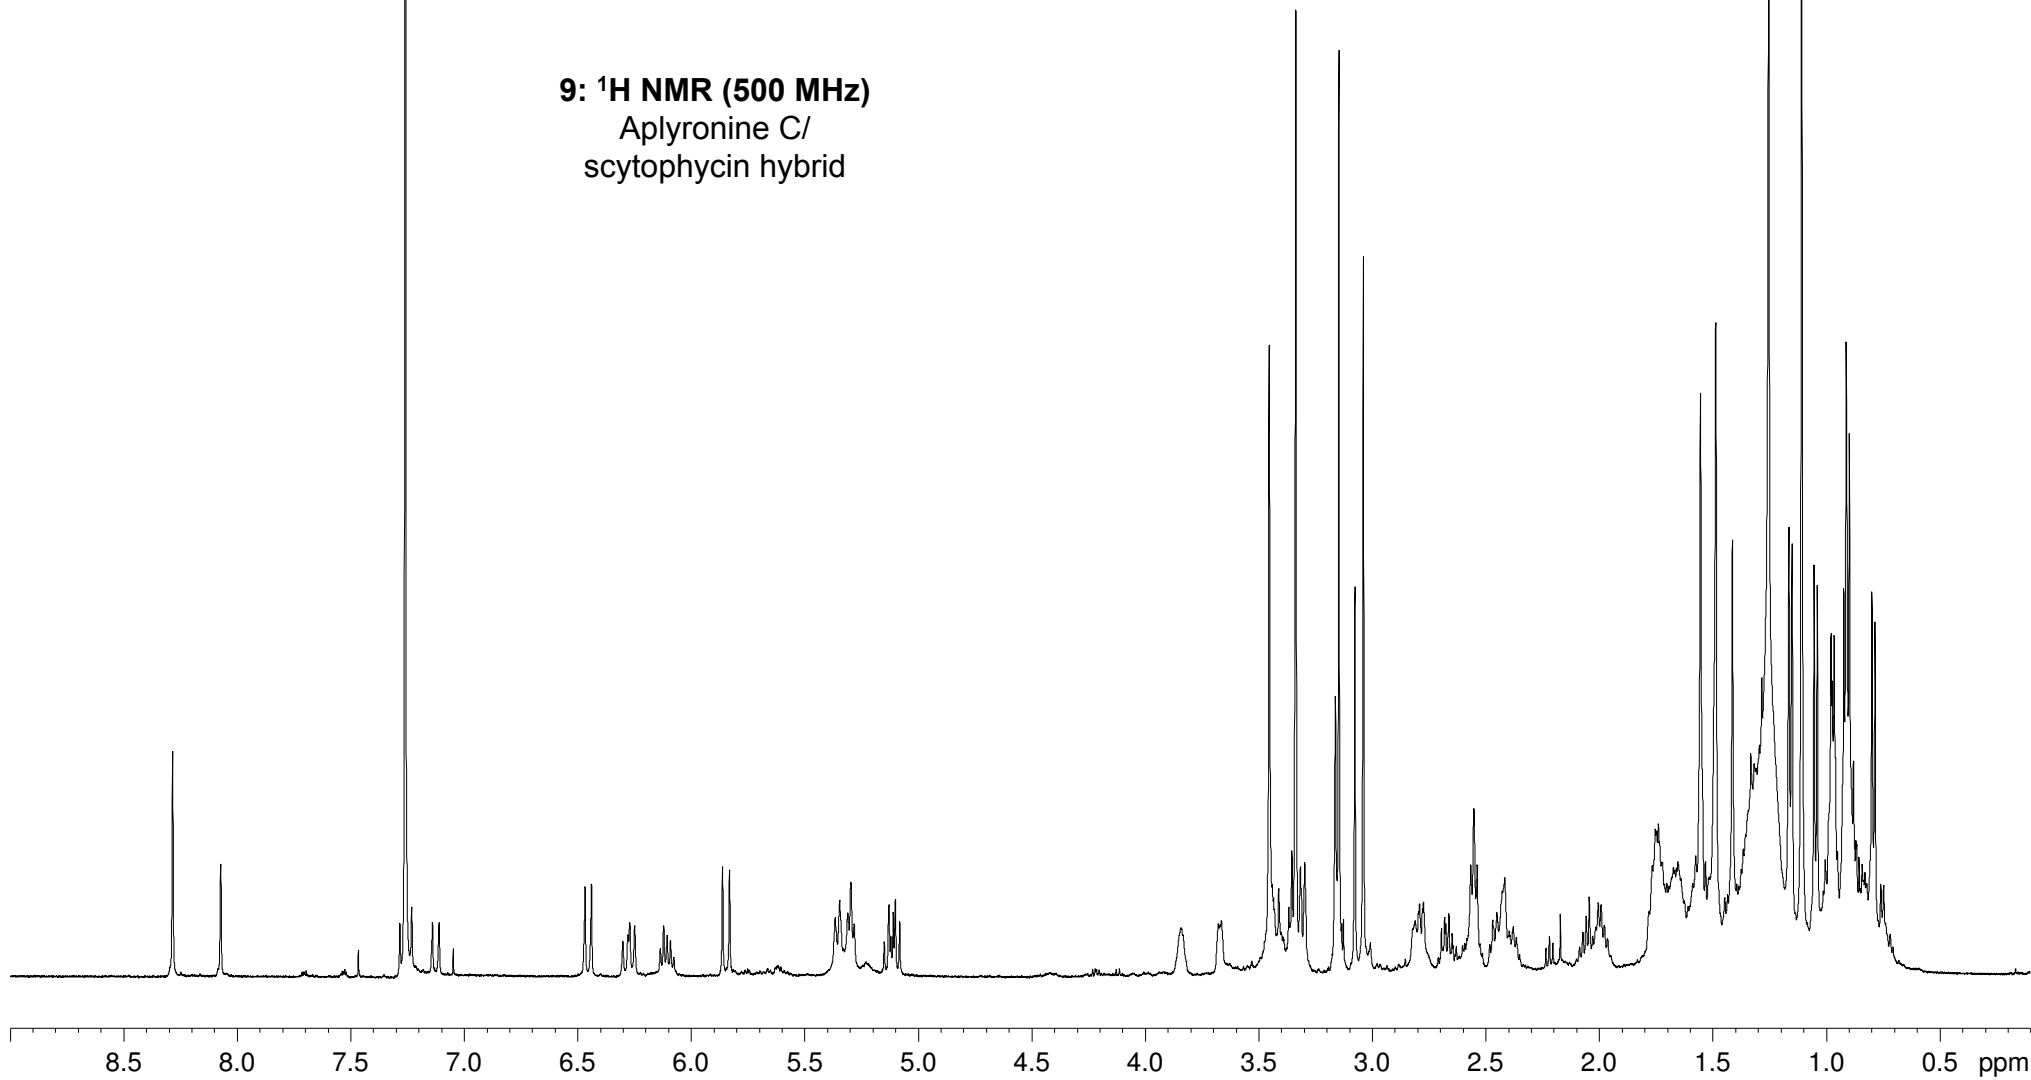

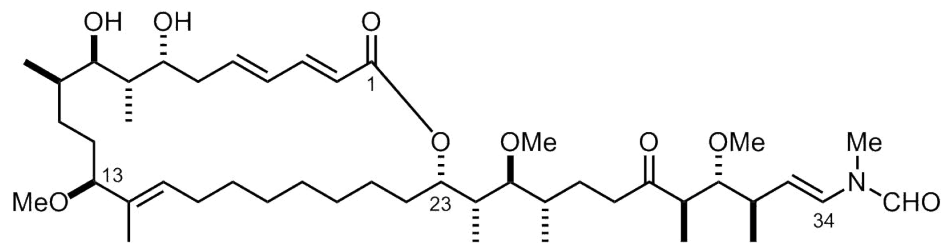

**9: <sup>13</sup>C NMR (125 MHz)**  
Aplyronine C/scytophycin hybrid

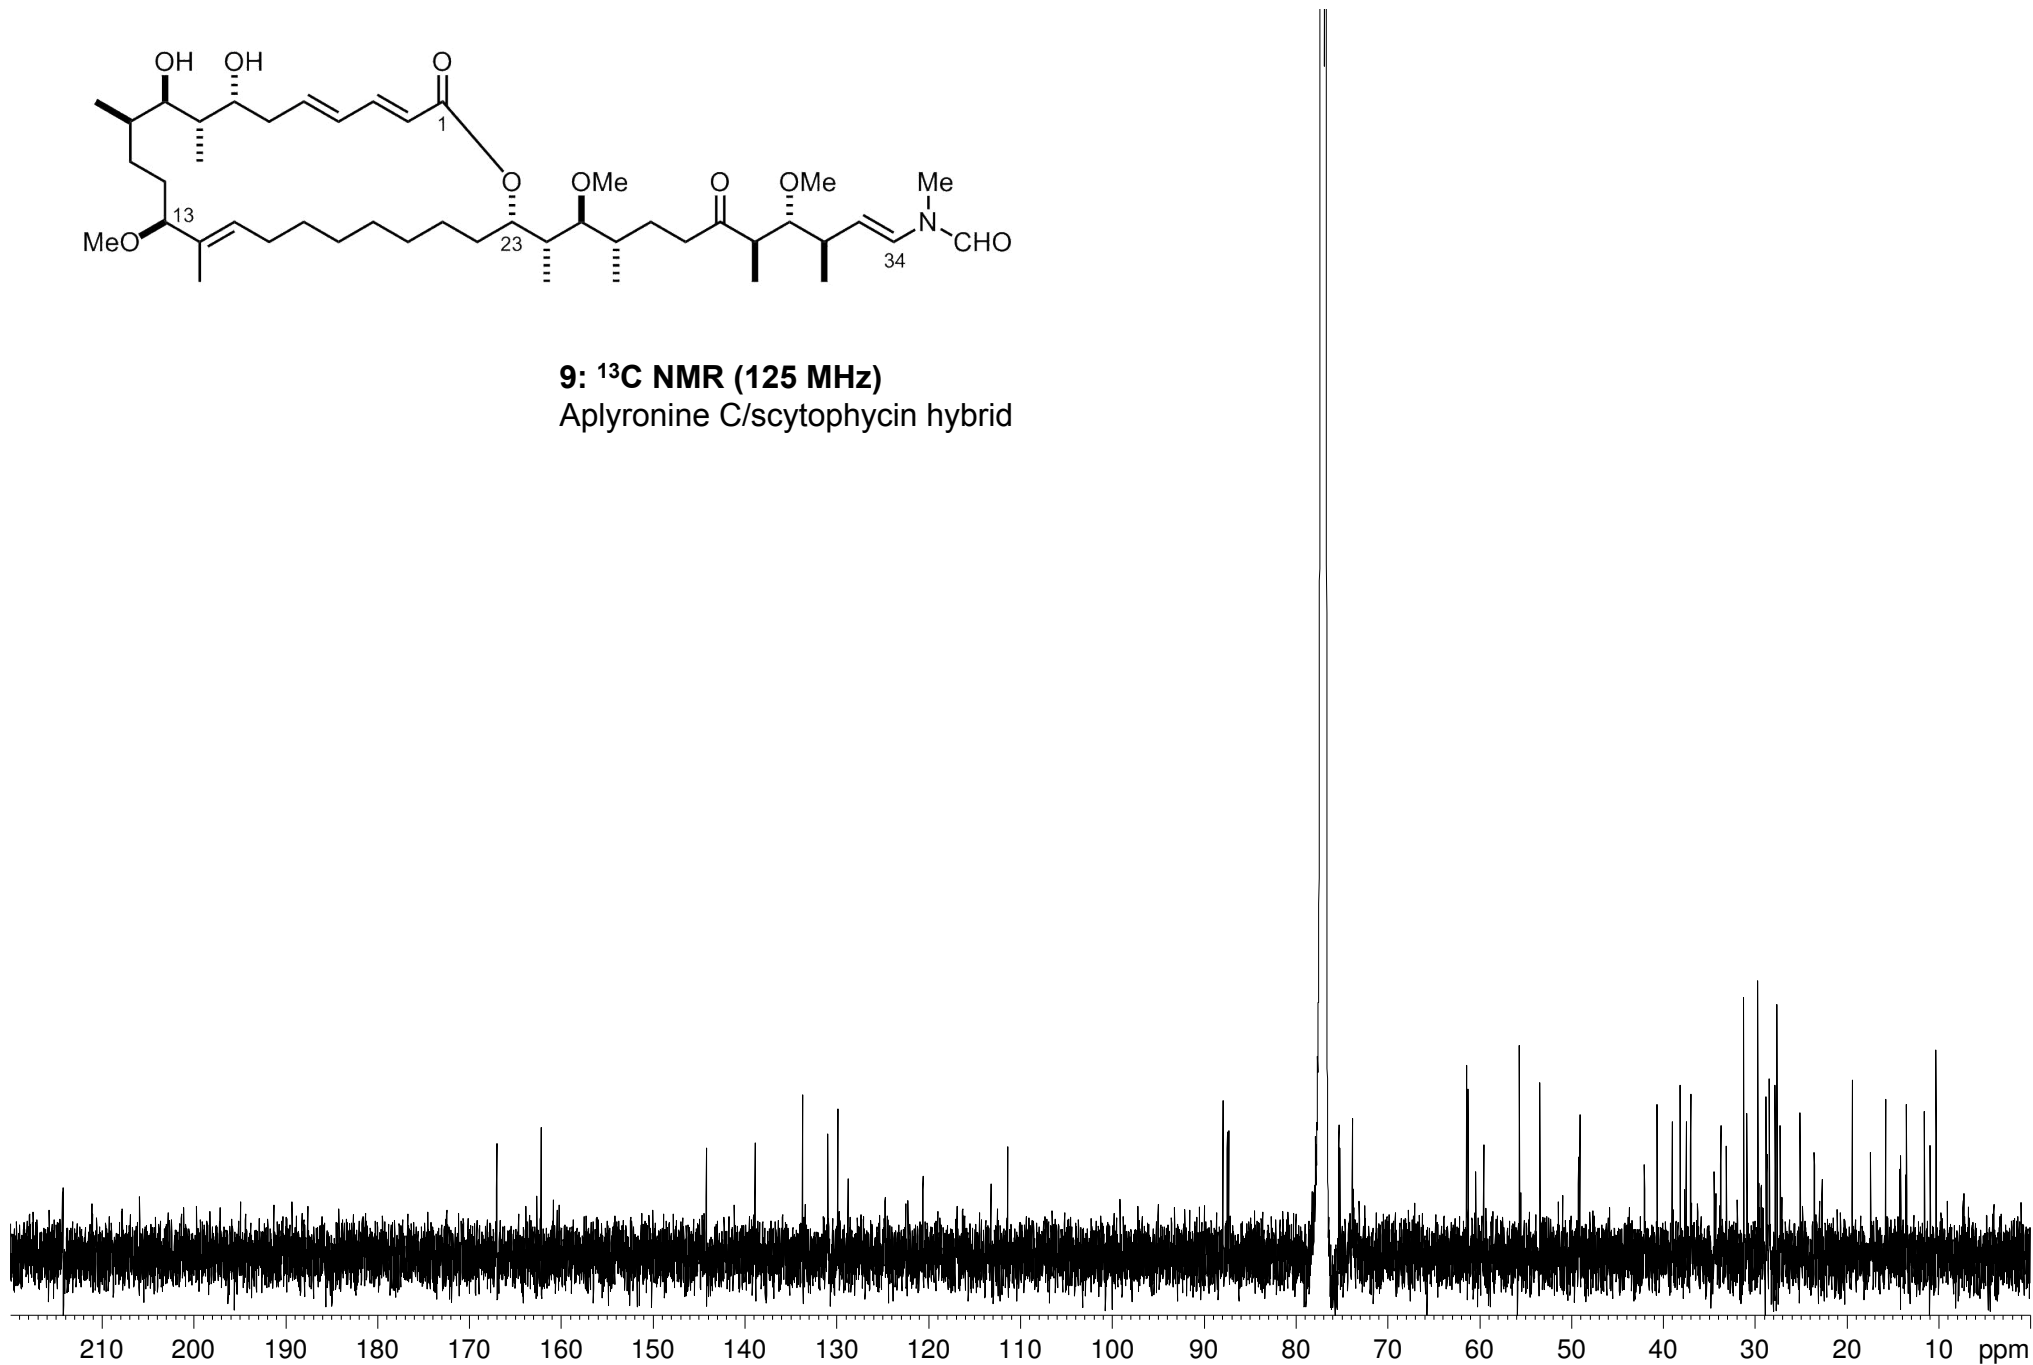

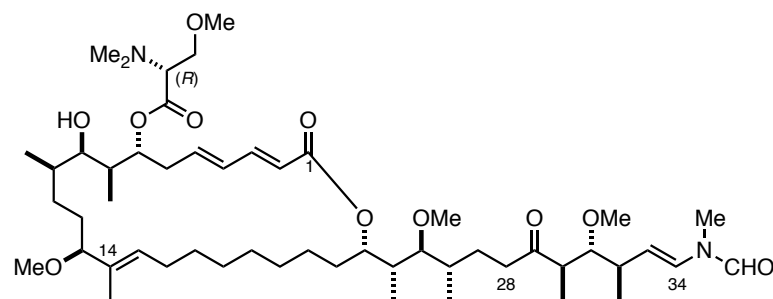

**R-8: <sup>1</sup>H NMR (500 MHz)**  
Aplyronine A, D/scytophycin hybrid

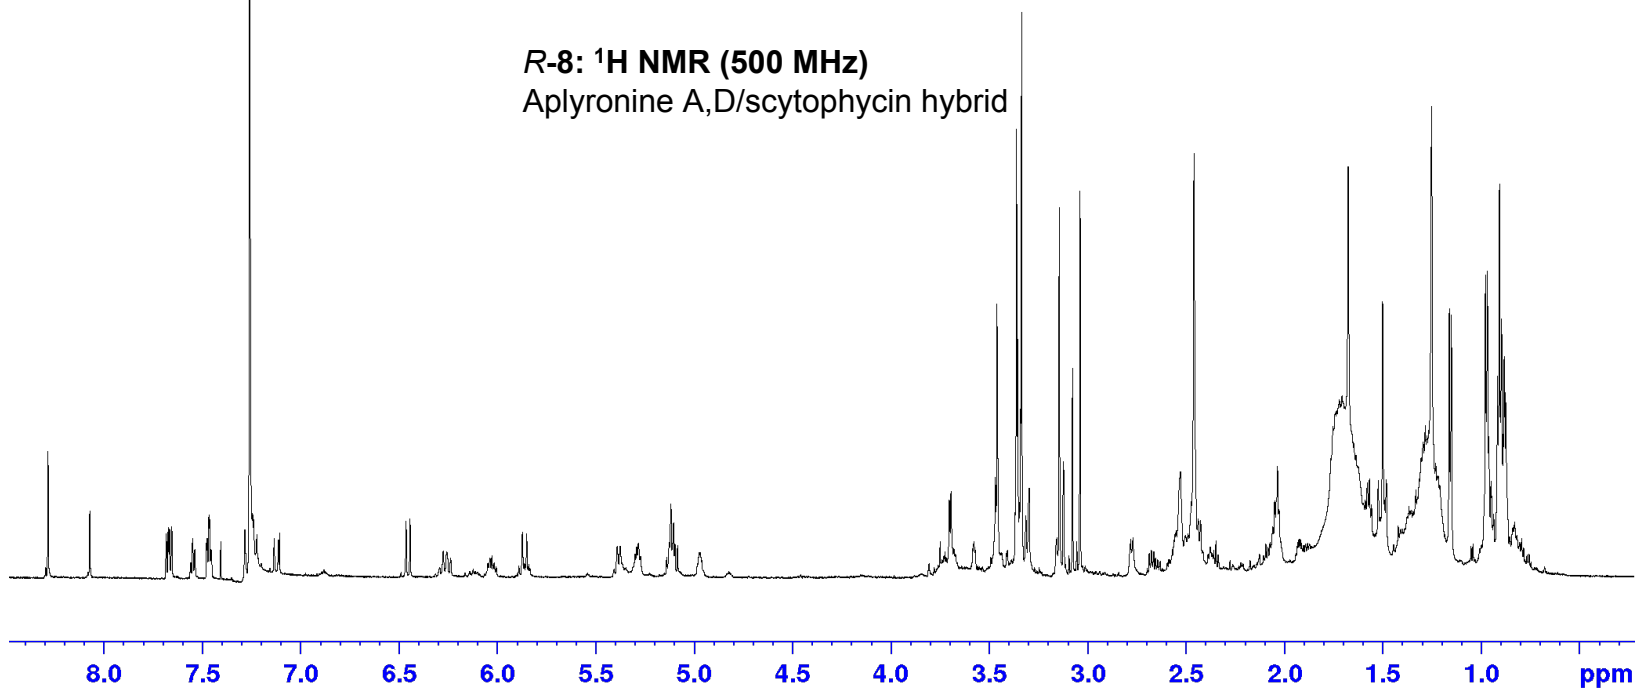

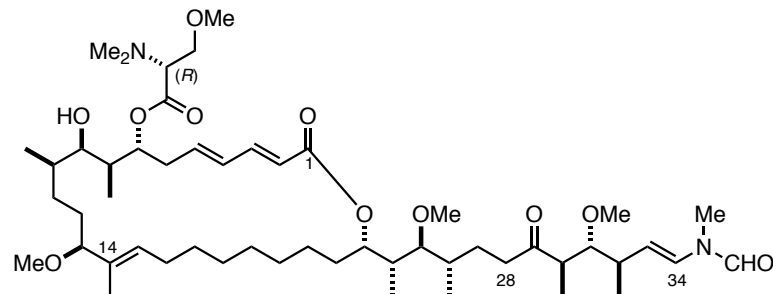

**R-8: <sup>13</sup>C NMR (125 MHz)**  
Aplyronine A,D/scytophycin hybrid

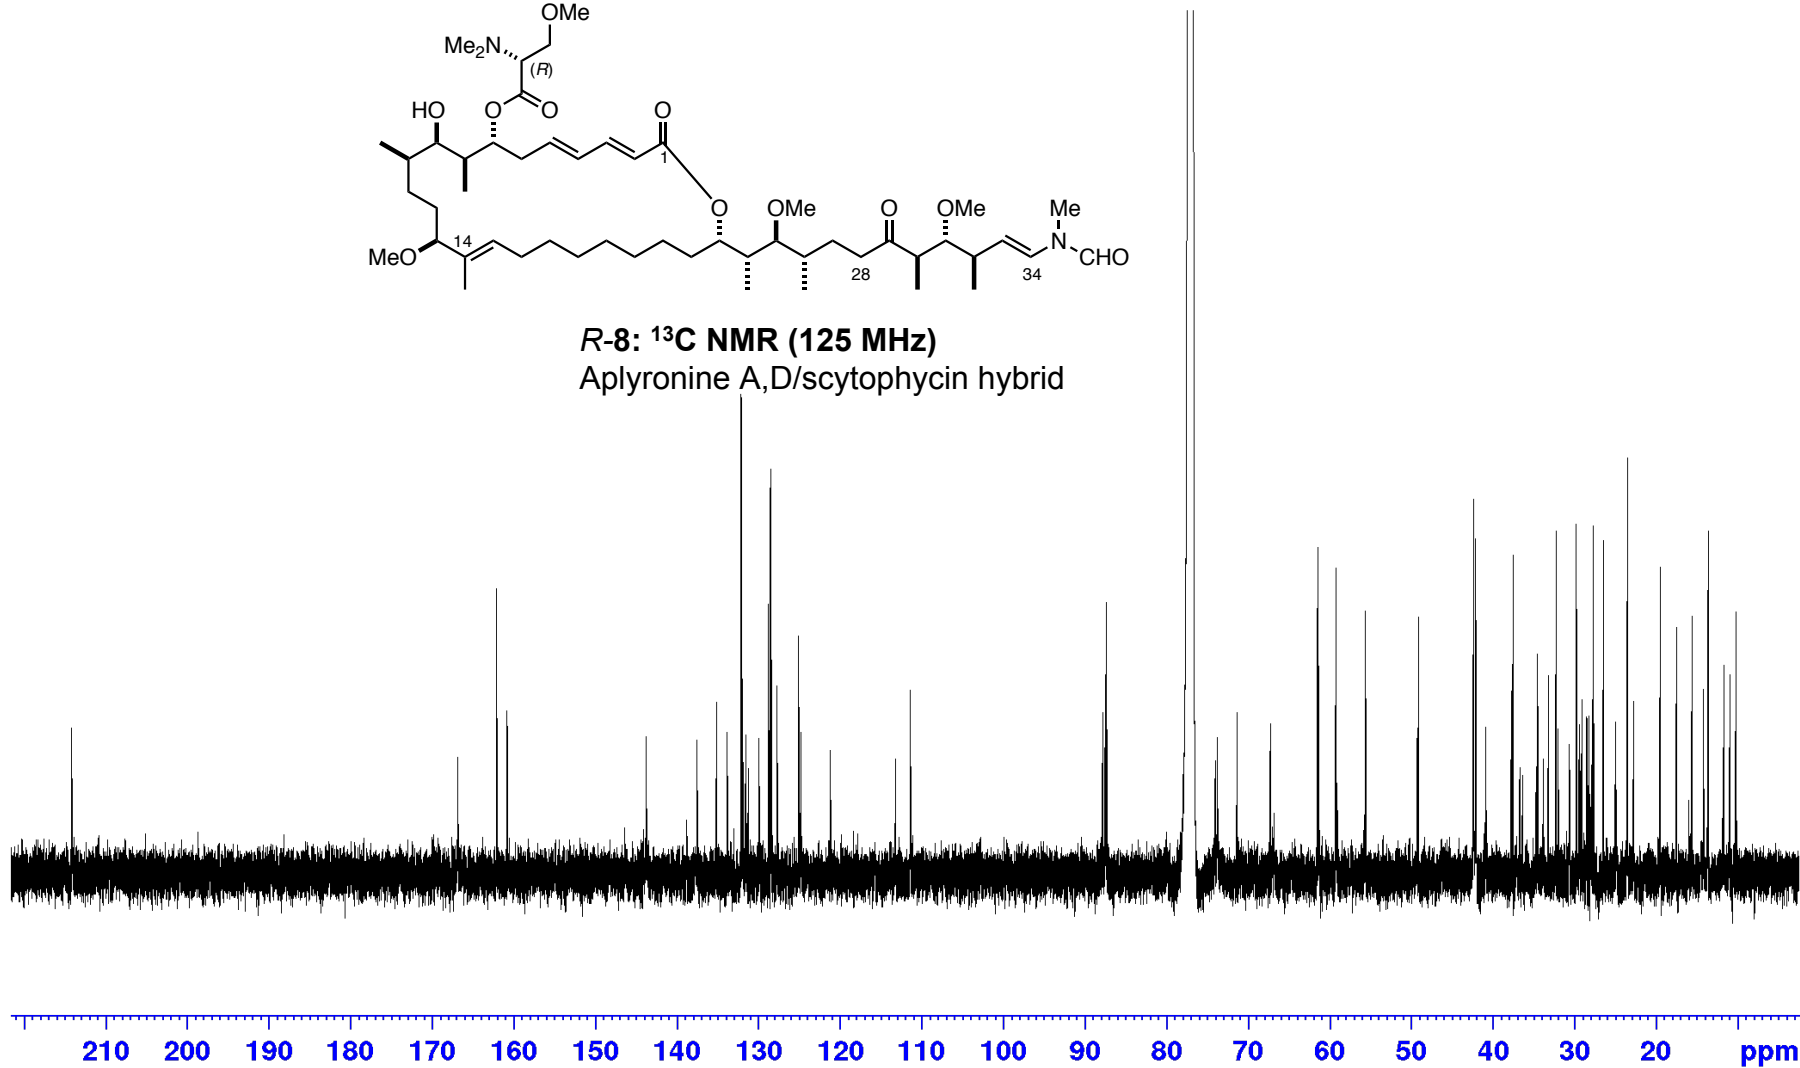



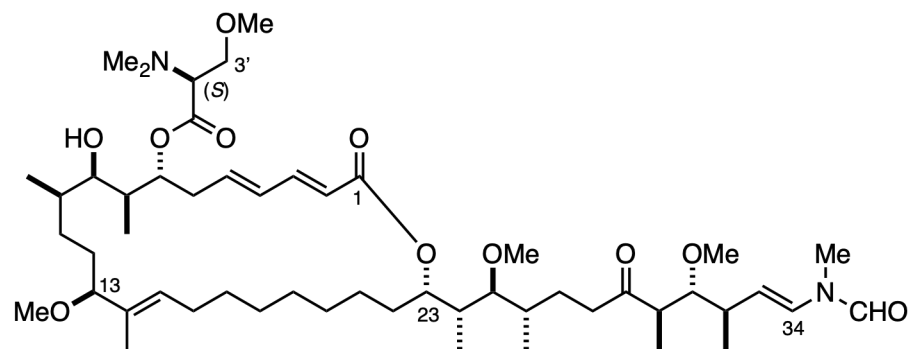

**S-8:  $^{13}\text{C}$  NMR (125 MHz)**  
 Aplyronine A,D/  
 scytophycin hybrid

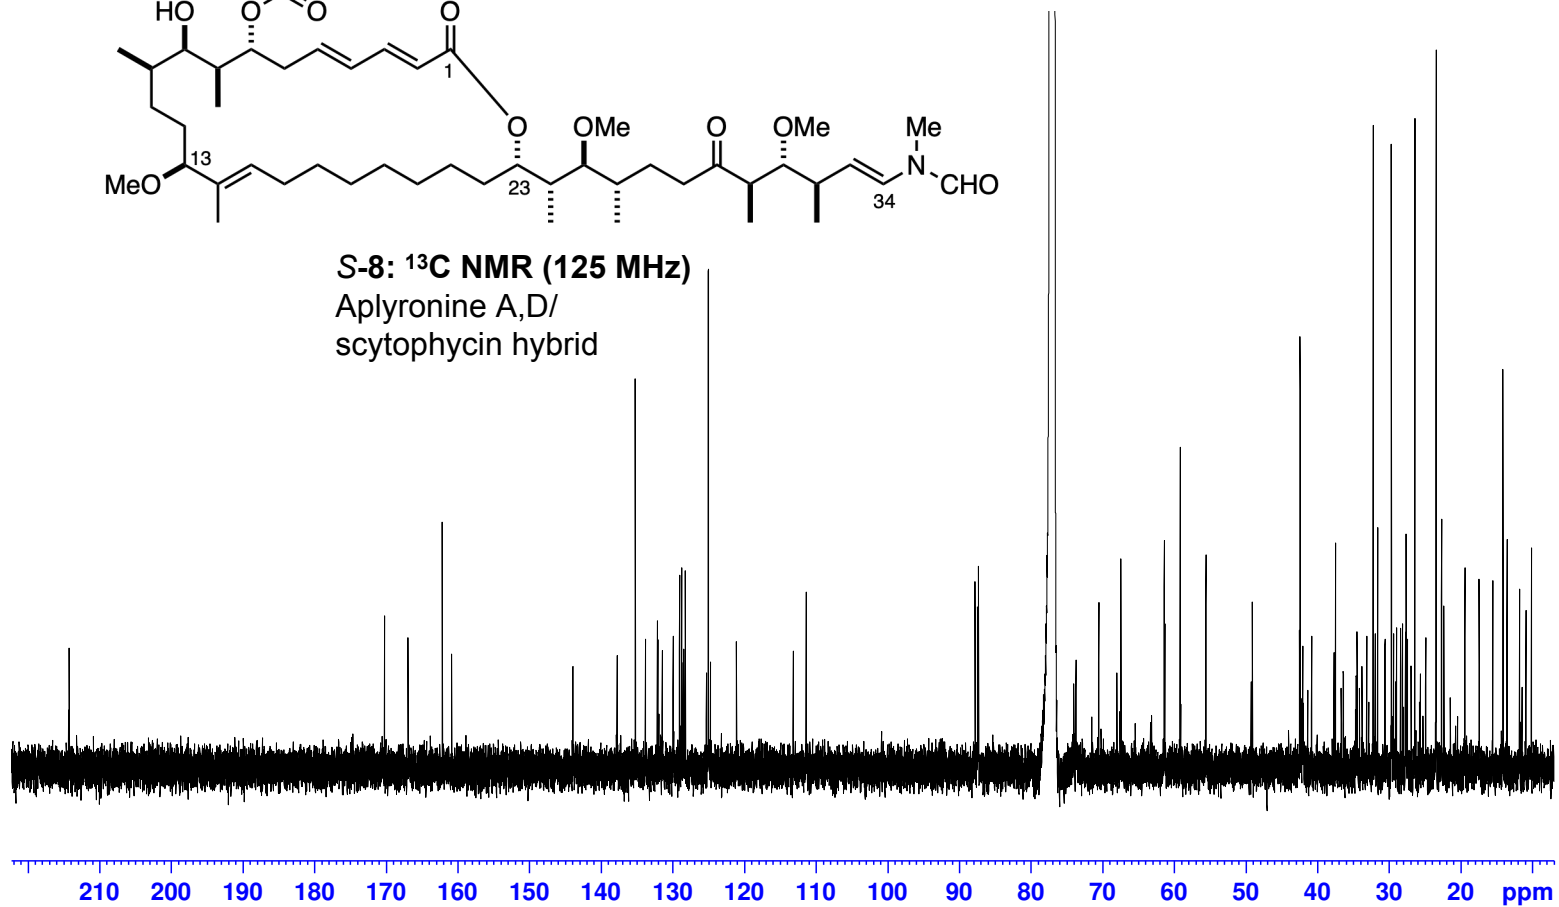

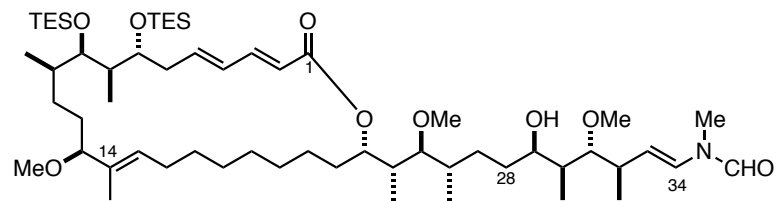

**27a: <sup>1</sup>H NMR (500 MHz)**

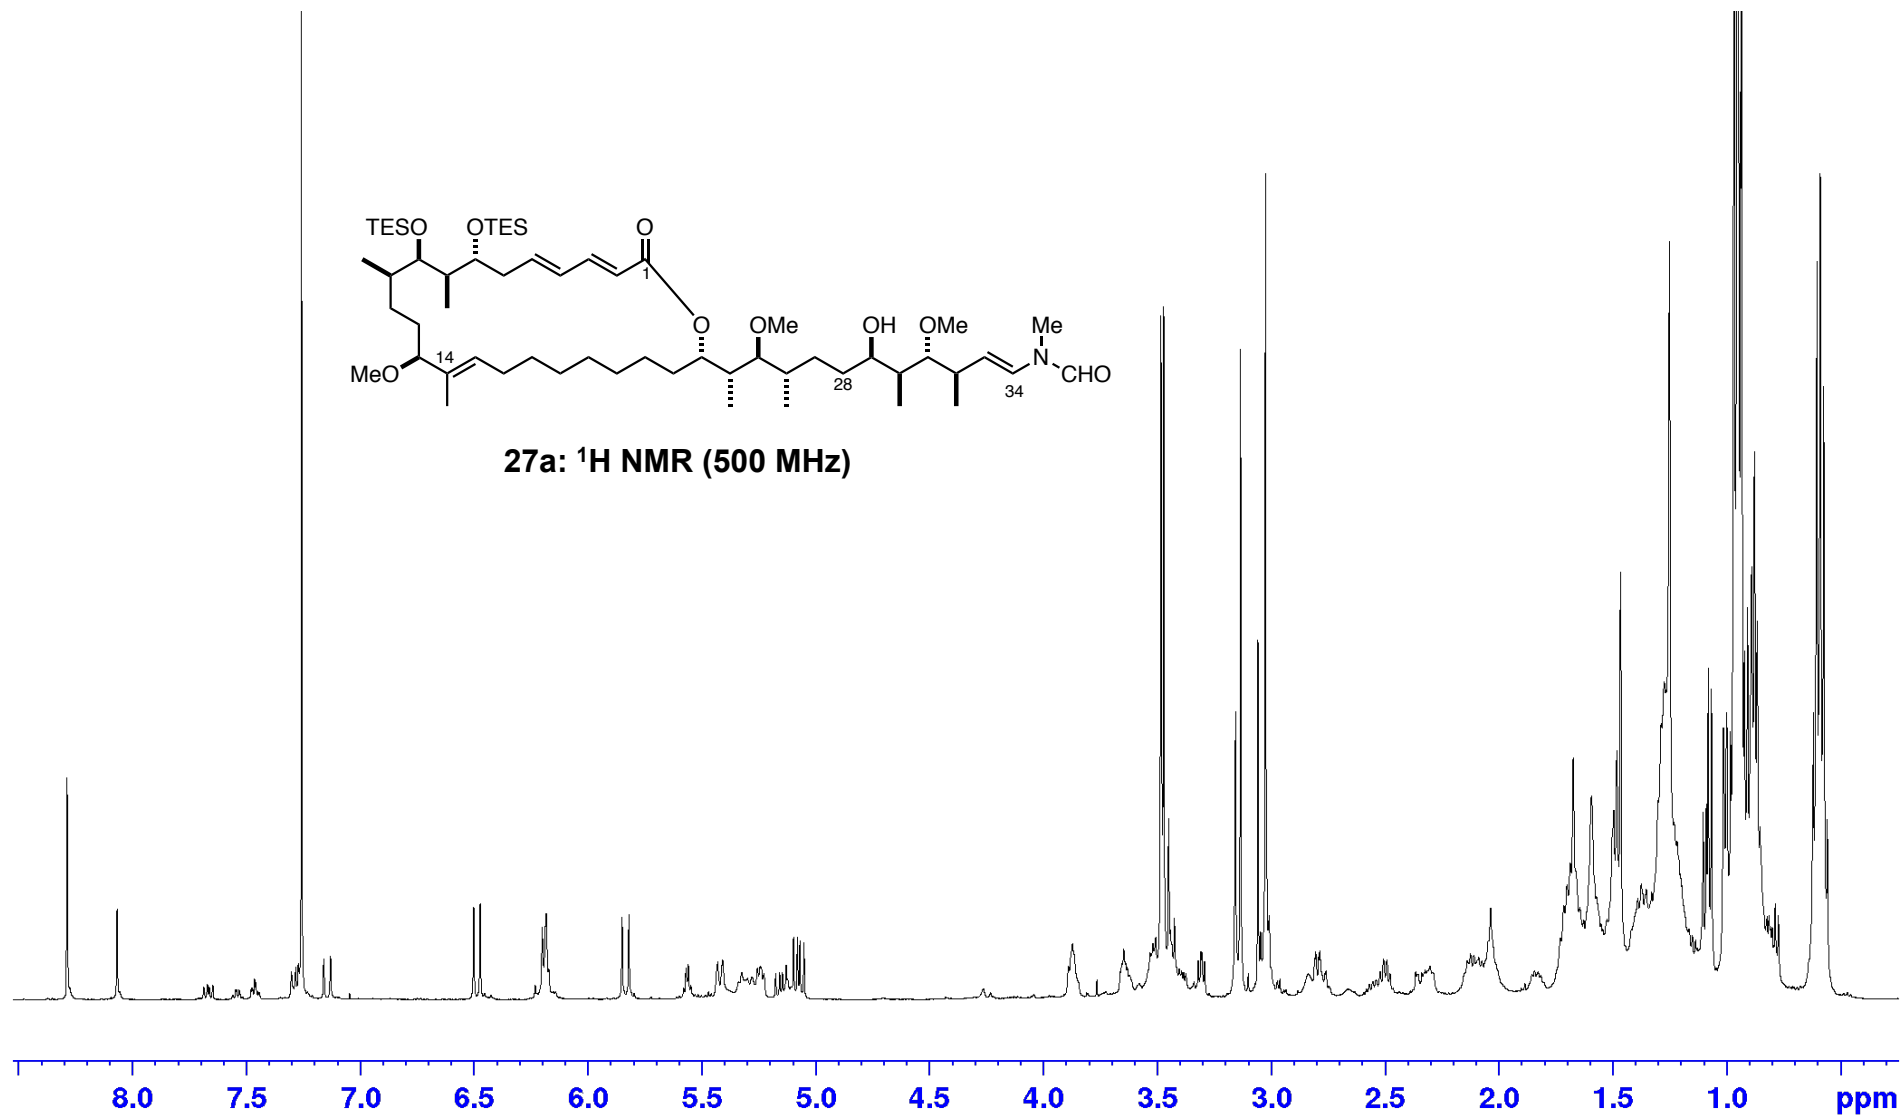









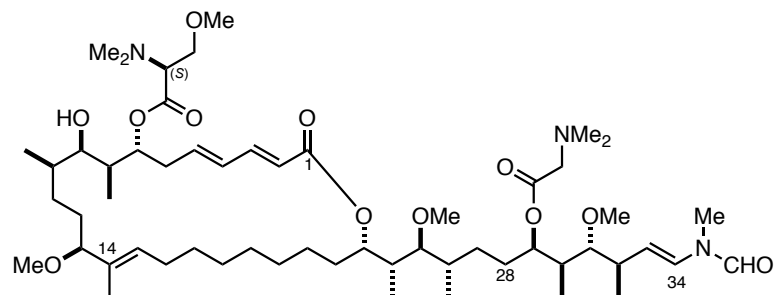

7: <sup>1</sup>H NMR (500 MHz)  
Aplyrologue D

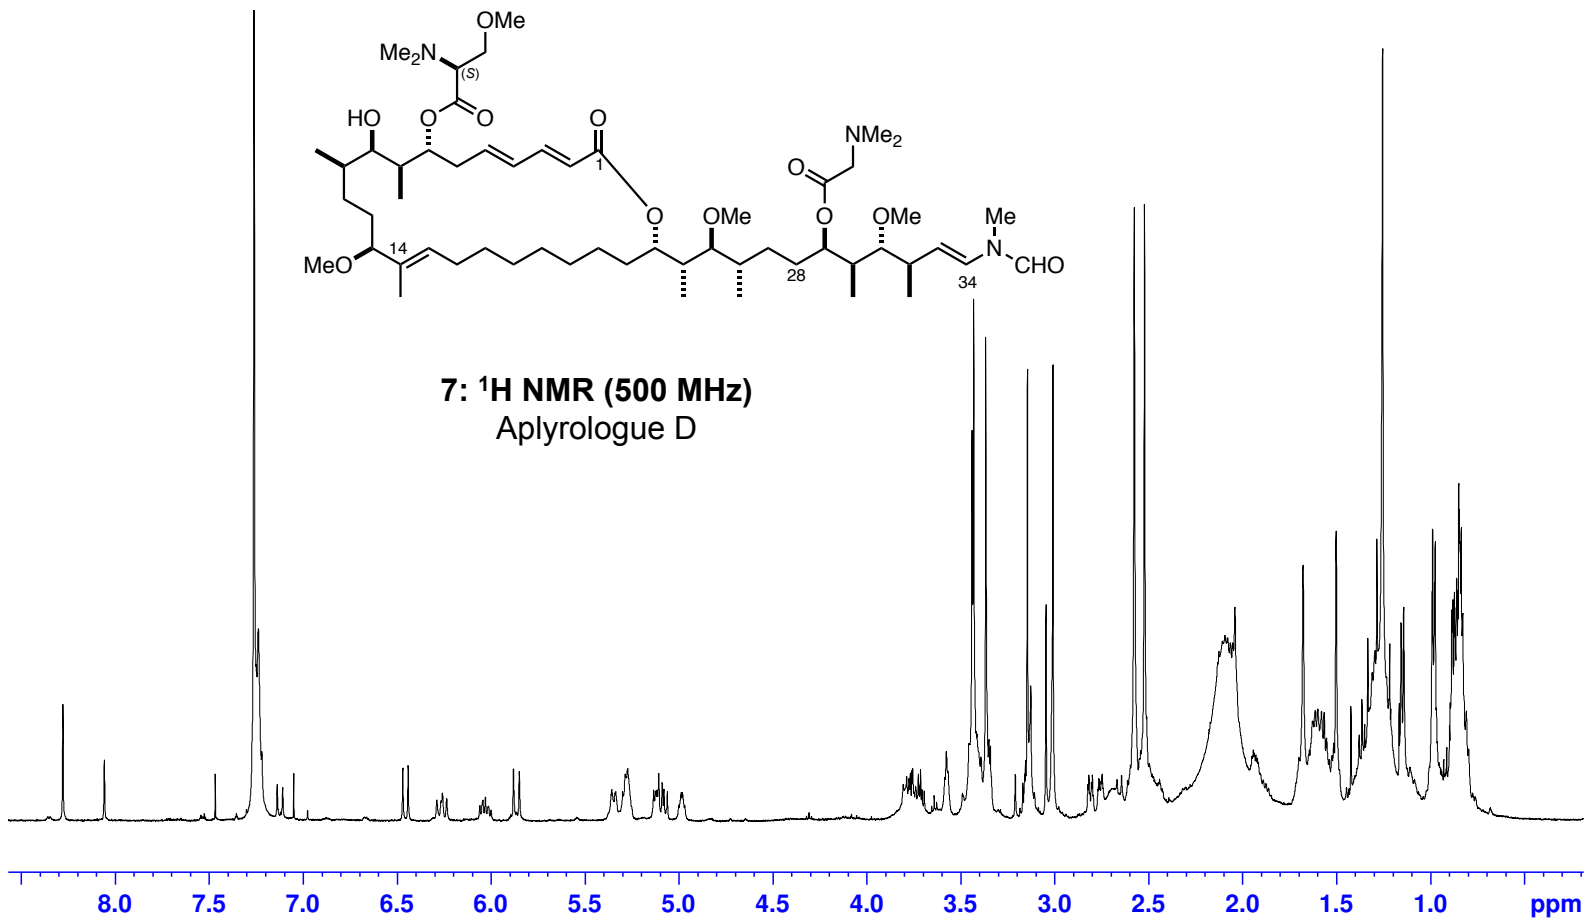

Supplement: c9cc09050a1.pdf [file c9cc09050a1.pdf]
